# Supplementary material for: Comparison and Analysis of Injuries At Ski Resorts in Chongli, China and Japan
Source: Research Square preprint supplement (doi:10.21203/rs.3.rs-1134070/v1), 2021-12-07
Supplement: Supplementary file 1 [file 2a0d6ff34b82a9d032c93750.pdf]

2019/2020シーズン  
スキー場傷害報告書  
令和2年2月1日～2月29日

全部把握出来!!!

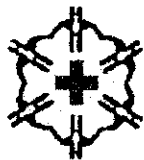

全国スキー安全対策協議会

## 目 次

|                                                                   |    |
|-------------------------------------------------------------------|----|
| はじめに                                                              | 3  |
| 1. 協力スキー場および調査期間                                                  | 4  |
| 2. 用具の分類                                                          | 4  |
| 3. 受傷者数および集計・分析の対象                                                | 4  |
| 4. スキーとスノーボードの受傷者割合                                               | 7  |
| 5. 用具別の受傷者割合                                                      | 7  |
| 6. リフト等の輸送人員                                                      | 8  |
| 7. 受傷率                                                            | 9  |
| 8. スキー受傷率およびスノーボード受傷率                                             | 10 |
| 9. 受傷時間帯                                                          | 15 |
| 10. 天候                                                            | 16 |
| 11. 性別                                                            | 17 |
| 12. 年齢                                                            | 17 |
| 13. 技能                                                            | 18 |
| 14. 受傷場所                                                          | 19 |
| 15. 受傷原因                                                          | 20 |
| 16. 傷害の部位と種類                                                      | 22 |
| 17. 傷害程度                                                          | 24 |
| 18. 頭を強く打った疑い                                                     | 25 |
| 19. ヘルメットの着用状況                                                    | 25 |
| 20. 保険の加入状況                                                       | 26 |
| 21. 受傷時の行動                                                        | 27 |
| 22. 受傷時のスピード                                                      | 28 |
| 23. 雪面状況                                                          | 29 |
| 24. 雪質                                                            | 29 |
| 資料 1 2019/2020 シーズン スキー場内および管理区域外での死亡事故一覧表<br>(2020 年 3 月 31 日現在) | 30 |
| 資料 2 スノースポーツ死亡者数の 17 年間の推移                                        | 33 |
| 資料 3 2020 年 2 月スキー場傷害調査用紙                                         | 34 |
| 資料 4 全国統一スキー場標識マーク等色刷一覧表                                          | 35 |

## はじめに

このスキー場傷害報告書は、毎年全国スキー安全対策協議会より協力を依頼したスキー場の2月中のデータをもとに作成しています。

本調査は例年通り47スキー場の協力を得て実施することができました。各スキー場では、リフト・ゴンドラ等の新設・運休・廃止等シーズンによって状況が異なることがあるので、調査対象が同じであっても、その結果が必ずしも同じとは言えないかもしれません。しかし、そのような状況を考慮しても、我が国において、本調査のような大規模かつ長期にわたる経年的統計データは他に見られないことから、本調査には大切な意味があると考えられます。

2019/2020シーズンの調査結果の特徴として下記3項目が挙げられます。

はじめに、負傷者の国名を記入する欄を新たに設けました。その結果、全傷害件数(2,644件)に占める外国人の割合は全体で18%(476件)を占め、最も高い65%を筆頭に、20%を超えるスキー場は全国で11スキー場もありました。国別でみると、オーストラリア151人、台湾67人、香港56人、中国41人、アメリカ29人、タイ21人、シンガポール17人、イギリス11人、ニュージーランド10人、マレーシア8人の順でした。日本の良質な天然雪を求めてこれほど多くの外国人が訪れて、不幸にもケガをされているとは、今シーズンの調査結果を見るまで思いもよりませんでした。増え続けるインバウンド受傷者に対応する、スキー場の安全対策に関わるスタッフの苦労がうかがえます。

次に受傷率の推移について、昨シーズンのスキーの受傷率が過去20年間で最悪(0.0096)を記録しましたが、今シーズンは過去20年間の平均値(0.0079)とほぼ同じ値(0.0080)に回復しました。またスノーボードの受傷率も、昨シーズンは過去20年間でワースト3(0.0136)を記録しましたが、今シーズンは過去20年間でベスト(0.0105)を記録しました。受傷率が大幅に改善した要因について、詳しい分析を待たないとなりませんが、傷害件数が昨年と比べておよそ千件も減ったことや、新型コロナウイルスの影響で客足が落ちたことも関係するかもしれません。

主なスキー外傷の部位や種類の傾向は例年と変わらず、頭部外傷がスキーで4位、スノーボードで3位と高位を占めることから、ヘルメット着用を訴えてきました。スキーのヘルメット着用率は昨シーズン43.2%と初めて40%を超え、今シーズンは48.2%とさらに伸び、5割に迫ってきました。同様にスノーボードのヘルメット着用率も、8シーズン前の5%から着実に伸び続け、昨シーズンは22.9%、さらに今シーズンは24.4%と約1/4にまで確実に上昇を続けており、スノーボードの傷害発生率の低下に貢献しています。

本調査の目的はスキー場の傷害調査であることから、スキー場より報告された調査票に含まれる傷害以外の急病等の疾病については、傷害発生率などの分析に影響するので集計から除いています。その結果、傷害報告数と、本報告書の傷害件数が異なる場合があることをご了承願います。なお、調査項目については、記入に要する労力や経費削減の観点から引き続き精査しております。

本報告書が、スキー場のリスクマネジメント・スキー学校等における安全指導の参考資料等として活用され、安全で楽しいスノースポーツ発展の一助となることを願っています。

本調査にご協力いただいた、受傷したスノースポーツ愛好者の方々、スキーパトロール隊や診療所等スキー場関係者の皆様に厚くお礼申し上げます。

2020(令和2)年6月

全国スキー安全対策協議会  
調査委員 富 樫 泰 一

## 1. 協力スキー場および調査期間

2020 年 2 月 1 日から 2 月 29 日の 1 ヶ月間、全国 47 スキー場から報告があったデータをもとに集計・分析しました。協力スキー場及び受傷者数については表 1、表 2 に示しました。

なお、志賀高原スキー場については、志賀高原エリアの 8 スキー場を総合したものです。シーズンによって協力スキー場が異なる場合があります。

## 2. 用具の分類

用具は、2011/2012 シーズンの調査用紙より次のように分類しました。

### 1) スキー

- ① アルペンスキー（従来のノーマルスキー、カービングスキー、フアンスキーやファットスキー、モーグルスキー、オールランドスキー等を含む）
- ② スキーボード（スキー板の長さ 100cm 未満のもの）
- ③ テレマークスキー
- ④ クロスカントリースキー
- ⑤ その他のスキー

### 2) スノーボード

- ① フリースタイルスノーボード
- ② アルペンスノーボード
- ③ その他のスノーボード

### 3) ソリ

- ① 子供用ソリ
- ② 腰掛ソリ
- ③ 立ち乗りソリ（スノースケート等）
- ④ その他のソリ

### 4) その他

## 3. 受傷者数および集計・分析の対象

47 スキー場から送付されてきた調査票のうち、持病や体調不良など傷害ではないと思われるもの 24 件（リフト搬器衝突や落下事故、駐車場やレストハウス等での事故、内科系疾患等）を除き 2,644 件を分析の対象としました。その受傷者内訳は、スキー 1,174 件（表 1）、スノーボード 1,460 件（表 2）、ソリその他が 10 件（表 2）でした。

なお、各項目における集計・分析は原則として無記入（欠損値）を除いて行いました。



表1. 用具別受傷者数（スキー）

|    |                |           | (F)             | (人)                         |                  |                     |                 |           | (G) |
|----|----------------|-----------|-----------------|-----------------------------|------------------|---------------------|-----------------|-----------|-----|
| 番号 | スキー場           | 受傷者<br>合計 |                 |                             |                  |                     |                 |           |     |
|    |                |           | アル<br>ペン<br>スキー | スキー<br>ボード<br>(100cm<br>未満) | テレ<br>マーク<br>スキー | クロスカ<br>ントリー<br>スキー | その他<br>のスキ<br>ー | スキー<br>小計 |     |
| 1  | ニセコグランヒラフ      | 118       | 60              | 0                           | 0                | 0                   | 0               | 60        |     |
| 2  | 朝里川温泉スキー場      | 9         | 6               | 2                           | 0                | 0                   | 0               | 8         |     |
| 3  | サッポロテイネススキー場   | 33        | 24              | 0                           | 0                | 0                   | 0               | 24        |     |
| 4  | 札幌国際スキー場       | 21        | 8               | 0                           | 0                | 0                   | 0               | 8         |     |
| 5  | ルスツリゾートスキー場    | 117       | 71              | 1                           | 0                | 0                   | 0               | 72        |     |
| 6  | 富良野スキー場        | 58        | 33              | 0                           | 2                | 0                   | 0               | 36        |     |
| 7  | 大鱒温泉スキー場       | 8         | 7               | 0                           | 0                | 0                   | 0               | 7         |     |
| 8  | 安比高原スキー場       | 68        | 35              | 0                           | 0                | 0                   | 0               | 35        |     |
| 9  | みやぎ蔵王白石スキー場    | 9         | 7               | 0                           | 0                | 0                   | 0               | 7         |     |
| 10 | みやぎ蔵王えぼしスキー場   | 30        | 10              | 0                           | 0                | 0                   | 1               | 11        |     |
| 11 | 猪苗代スキー場        | 39        | 17              | 1                           | 0                | 0                   | 0               | 18        |     |
| 12 | 裏磐梯猫魔スキー場      | 23        | 7               | 0                           | 0                | 0                   | 0               | 7         |     |
| 13 | アルツ磐梯スキー場      | 55        | 11              | 0                           | 0                | 0                   | 2               | 15        |     |
| 14 | 会津高原たかつえスキー場   | 8         | 2               | 0                           | 0                | 0                   | 0               | 2         |     |
| 15 | たざわ湖スキー場       | 22        | 13              | 0                           | 0                | 0                   | 0               | 13        |     |
| 16 | 蔵王温泉スキー場       | 105       | 63              | 2                           | 0                | 0                   | 3               | 68        |     |
| 17 | 苗場スキー場         | 75        | 40              | 0                           | 0                | 0                   | 1               | 41        |     |
| 18 | 石打丸山スキー場       | 65        | 23              | 0                           | 0                | 0                   | 4               | 27        |     |
| 19 | 舞子スノーリゾート      | 35        | 2               | 0                           | 0                | 0                   | 0               | 2         |     |
| 20 | 上越国際スキー場       | 74        | 44              | 1                           | 0                | 0                   | 0               | 45        |     |
| 21 | 六日町八海山スキー場     | 6         | 4               | 0                           | 0                | 0                   | 0               | 4         |     |
| 22 | 斑尾高原スキー場       | 121       | 41              | 0                           | 0                | 0                   | 0               | 41        |     |
| 23 | 野沢温泉スキー場       | 127       | 56              | 0                           | 0                | 0                   | 0               | 56        |     |
| 24 | 志賀高原スキー場       | 160       | 104             | 0                           | 0                | 0                   | 0               | 105       |     |
| 25 | 白馬五竜スキー場       | 145       | 61              | 1                           | 0                | 0                   | 1               | 63        |     |
| 26 | 白馬八方尾根スキー場     | 150       | 97              | 0                           | 0                | 0                   | 0               | 97        |     |
| 27 | 白馬岩岳スノーフィールド   | 60        | 19              | 0                           | 1                | 0                   | 0               | 20        |     |
| 28 | 榎池高原スキー場       | 146       | 54              | 0                           | 0                | 0                   | 1               | 55        |     |
| 29 | 立山山麓スキー場       | 5         | 3               | 0                           | 0                | 0                   | 0               | 3         |     |
| 30 | 白山一里野温泉スキー場    | 10        | 5               | 0                           | 0                | 0                   | 0               | 5         |     |
| 31 | 草津国際スキー場       | 26        | 9               | 0                           | 0                | 0                   | 0               | 9         |     |
| 32 | スノーパーク尾瀬戸倉     | 14        | 2               | 0                           | 0                | 0                   | 1               | 3         |     |
| 33 | 万座温泉スキー場       | 15        | 13              | 0                           | 0                | 0                   | 0               | 13        |     |
| 34 | ハンターマウンテン塩原    | 140       | 21              | 0                           | 0                | 0                   | 0               | 21        |     |
| 35 | ダイナランド         | 206       | 33              | 0                           | 0                | 0                   | 1               | 34        |     |
| 36 | SKI JAM 勝山スキー場 | 39        | 16              | 0                           | 0                | 0                   | 1               | 17        |     |
| 37 | 箱館山スキー場        | 4         | 3               | 0                           | 0                | 0                   | 0               | 3         |     |
| 38 | ハチ北高原スキー場      | 77        | 17              | 1                           | 0                | 0                   | 0               | 18        |     |
| 39 | びわ湖パレイススキー場    | 46        | 19              | 1                           | 0                | 0                   | 0               | 20        |     |
| 40 | 奥神鍋スキー場        |           |                 |                             |                  | 0                   |                 |           |     |
| 41 | ハチ高原スキー場       | 59        | 33              | 0                           | 0                | 0                   | 0               | 33        |     |
| 42 | だいせんホワイトリゾート   | 44        | 25              | 1                           | 0                | 0                   | 0               | 26        |     |
| 43 | 芸北国際スキー場       | 8         | 2               | 0                           | 0                | 0                   | 0               | 2         |     |
| 44 | 恐羅漢スノーパーク      | 7         | 1               | 0                           | 1                | 0                   | 1               | 3         |     |
| 45 | 瑞穂ハイランド        | 44        | 9               | 0                           | 0                | 0                   | 1               | 10        |     |
| 46 | ユートピアサイオト      | 10        | 6               | 0                           | 0                | 0                   | 0               | 6         |     |
| 47 | 久万スキーランド       | 3         | 1               | 0                           | 0                | 0                   | 0               | 1         |     |
|    | 合 計            | 2,644     | 1,137           | 11                          | 4                | 0                   | 18              | 1,174     |     |

表2. 用具別受傷者数（スノーボード・ソリ・その他）

|    |                | (F)       | (H)                       |                        |                        |                  | (I=ソリ小計+その他)(人) |          |            |            |          |     |
|----|----------------|-----------|---------------------------|------------------------|------------------------|------------------|-----------------|----------|------------|------------|----------|-----|
| 番号 | スキー場           | 受傷者<br>合計 | スノーボード                    |                        |                        | スノー<br>ボード<br>小計 | ソリ              |          |            |            |          | その他 |
|    |                |           | フリー<br>スタイル<br>スノー<br>ボード | アルペ<br>ン<br>スノー<br>ボード | その他<br>のス<br>ノー<br>ボード |                  | 子ども<br>用ソリ      | 腰掛ソ<br>リ | 立ち乗<br>りソリ | その他<br>のソリ | ソリ<br>小計 |     |
| 1  | ニセコグランヒラフ      | 118       | 57                        | 1                      | 0                      | 58               | 0               | 0        | 0          | 0          | 0        | 0   |
| 2  | 朝里川温泉スキー場      | 9         | 1                         | 0                      | 0                      | 1                | 0               | 0        | 0          | 0          | 0        | 0   |
| 3  | サッポロテイネススキー場   | 33        | 8                         | 0                      | 0                      | 8                | 0               | 0        | 0          | 1          | 1        | 0   |
| 4  | 札幌国際スキー場       | 21        | 13                        | 0                      | 0                      | 13               | 0               | 0        | 0          | 0          | 0        | 0   |
| 5  | ルスツリゾートスキー場    | 117       | 45                        | 0                      | 0                      | 45               | 0               | 0        | 0          | 0          | 0        | 0   |
| 6  | 富良野スキー場        | 58        | 22                        | 0                      | 0                      | 22               | 0               | 0        | 0          | 0          | 0        | 0   |
| 7  | 大鱒温泉スキー場       | 8         | 1                         | 0                      | 0                      | 1                | 0               | 0        | 0          | 0          | 0        | 0   |
| 8  | 安比高原スキー場       | 68        | 32                        | 1                      | 0                      | 33               | 0               | 0        | 0          | 0          | 0        | 0   |
| 9  | みやぎ蔵王白石スキー場    | 9         | 1                         | 0                      | 0                      | 1                | 0               | 0        | 0          | 0          | 0        | 1   |
| 10 | みやぎ蔵王えぼしスキー場   | 30        | 19                        | 0                      | 0                      | 19               | 0               | 0        | 0          | 0          | 0        | 0   |
| 11 | 猪苗代スキー場        | 39        | 21                        | 0                      | 0                      | 21               | 0               | 0        | 0          | 0          | 0        | 0   |
| 12 | 裏磐梯猫魔スキー場      | 23        | 16                        | 0                      | 0                      | 16               | 0               | 0        | 0          | 0          | 0        | 0   |
| 13 | アルツ磐梯スキー場      | 55        | 38                        | 1                      | 0                      | 40               | 0               | 0        | 0          | 0          | 0        | 0   |
| 14 | 会津高原たかつえスキー場   | 8         | 6                         | 0                      | 0                      | 6                | 0               | 0        | 0          | 0          | 0        | 0   |
| 15 | たざわ湖スキー場       | 22        | 9                         | 0                      | 0                      | 9                | 0               | 0        | 0          | 0          | 0        | 0   |
| 16 | 蔵王温泉スキー場       | 105       | 37                        | 0                      | 0                      | 37               | 0               | 0        | 0          | 0          | 0        | 0   |
| 17 | 苗場スキー場         | 75        | 33                        | 0                      | 0                      | 33               | 0               | 0        | 0          | 0          | 0        | 0   |
| 18 | 石打丸山スキー場       | 65        | 31                        | 0                      | 6                      | 38               | 0               | 0        | 0          | 0          | 0        | 0   |
| 19 | 舞子スノーリゾート      | 35        | 33                        | 0                      | 0                      | 33               | 0               | 0        | 0          | 0          | 0        | 0   |
| 20 | 上越国際スキー場       | 74        | 29                        | 0                      | 0                      | 29               | 0               | 0        | 0          | 0          | 0        | 0   |
| 21 | 六日町八海山スキー場     | 6         | 2                         | 0                      | 0                      | 2                | 0               | 0        | 0          | 0          | 0        | 0   |
| 22 | 斑尾高原スキー場       | 121       | 80                        | 0                      | 0                      | 80               | 0               | 0        | 0          | 0          | 0        | 0   |
| 23 | 野沢温泉スキー場       | 127       | 68                        | 1                      | 0                      | 69               | 0               | 2        | 0          | 0          | 2        | 0   |
| 24 | 志賀高原スキー場       | 160       | 52                        | 1                      | 0                      | 53               | 0               | 2        | 0          | 0          | 2        | 0   |
| 25 | 白馬五竜スキー場       | 145       | 82                        | 0                      | 0                      | 82               | 0               | 0        | 0          | 0          | 0        | 0   |
| 26 | 白馬八方尾根スキー場     | 150       | 53                        | 0                      | 0                      | 53               | 0               | 0        | 0          | 0          | 0        | 0   |
| 27 | 白馬岩岳スノーフィールド   | 60        | 39                        | 0                      | 0                      | 39               | 0               | 0        | 0          | 0          | 0        | 1   |
| 28 | 樺池高原スキー場       | 146       | 88                        | 2                      | 1                      | 91               | 0               | 0        | 0          | 0          | 0        | 0   |
| 29 | 立山山麓スキー場       | 5         | 2                         | 0                      | 0                      | 2                | 0               | 0        | 0          | 0          | 0        | 0   |
| 30 | 白山一里野温泉スキー場    | 10        | 5                         | 0                      | 0                      | 5                | 0               | 0        | 0          | 0          | 0        | 0   |
| 31 | 草津国際スキー場       | 26        | 17                        | 0                      | 0                      | 17               | 0               | 0        | 0          | 0          | 0        | 0   |
| 32 | スノーパーク尾瀬戸倉     | 14        | 11                        | 0                      | 0                      | 11               | 0               | 0        | 0          | 0          | 0        | 0   |
| 33 | 万座温泉スキー場       | 15        | 2                         | 0                      | 0                      | 2                | 0               | 0        | 0          | 0          | 0        | 0   |
| 34 | ハンターマウンテン塩原    | 140       | 117                       | 0                      | 0                      | 117              | 0               | 0        | 0          | 0          | 0        | 1   |
| 35 | ダイナランド         | 206       | 171                       | 1                      | 0                      | 172              | 0               | 0        | 0          | 0          | 0        | 0   |
| 36 | SKI JAM 勝山スキー場 | 39        | 22                        | 0                      | 0                      | 22               | 0               | 0        | 0          | 0          | 0        | 0   |
| 37 | 箱館山スキー場        | 4         | 1                         | 0                      | 0                      | 1                | 0               | 0        | 0          | 0          | 0        | 0   |
| 38 | ハチ北高原スキー場      | 77        | 58                        | 1                      | 0                      | 59               | 0               | 0        | 0          | 0          | 0        | 0   |
| 39 | びわ湖バレイスキー場     | 46        | 26                        | 0                      | 0                      | 26               | 0               | 0        | 0          | 0          | 0        | 0   |
| 40 | 奥神鍋スキー場        | 0         | 0                         | 0                      | 0                      | 0                | 0               | 0        | 0          | 0          | 0        | 0   |
| 41 | ハチ高原スキー場       | 59        | 26                        | 0                      | 0                      | 26               | 0               | 0        | 0          | 0          | 0        | 0   |
| 42 | だいせんホワイトリゾート   | 44        | 18                        | 0                      | 0                      | 18               | 0               | 0        | 0          | 0          | 0        | 0   |
| 43 | 芸北国際スキー場       | 8         | 6                         | 0                      | 0                      | 6                | 0               | 0        | 0          | 0          | 0        | 0   |
| 44 | 恐羅漢スノーパーク      | 7         | 4                         | 0                      | 0                      | 4                | 0               | 0        | 0          | 0          | 0        | 0   |
| 45 | 瑞穂ハイランド        | 44        | 33                        | 0                      | 1                      | 34               | 0               | 0        | 0          | 0          | 0        | 0   |
| 46 | ユートピアサイオト      | 10        | 4                         | 0                      | 0                      | 4                | 0               | 0        | 0          | 0          | 0        | 0   |
| 47 | 久万スキーランド       | 3         | 1                         | 1                      | 0                      | 2                | 0               | 0        | 0          | 0          | 0        | 0   |
|    | 合 計            | 2,644     | 1,440                     | 10                     | 8                      | 1,460            | 0               | 4        | 0          | 1          | 5        | 3   |

#### 4. スキーとスノーボードの受傷者割合

図1は過去5年間のスキー及びスノーボードの受傷者の割合を示したものです（ソリ等その他を除いて集計）。受傷者割合はこの4シーズンで大きな変化がなく、スキーは44.6%、スノーボードは55.4%でした。

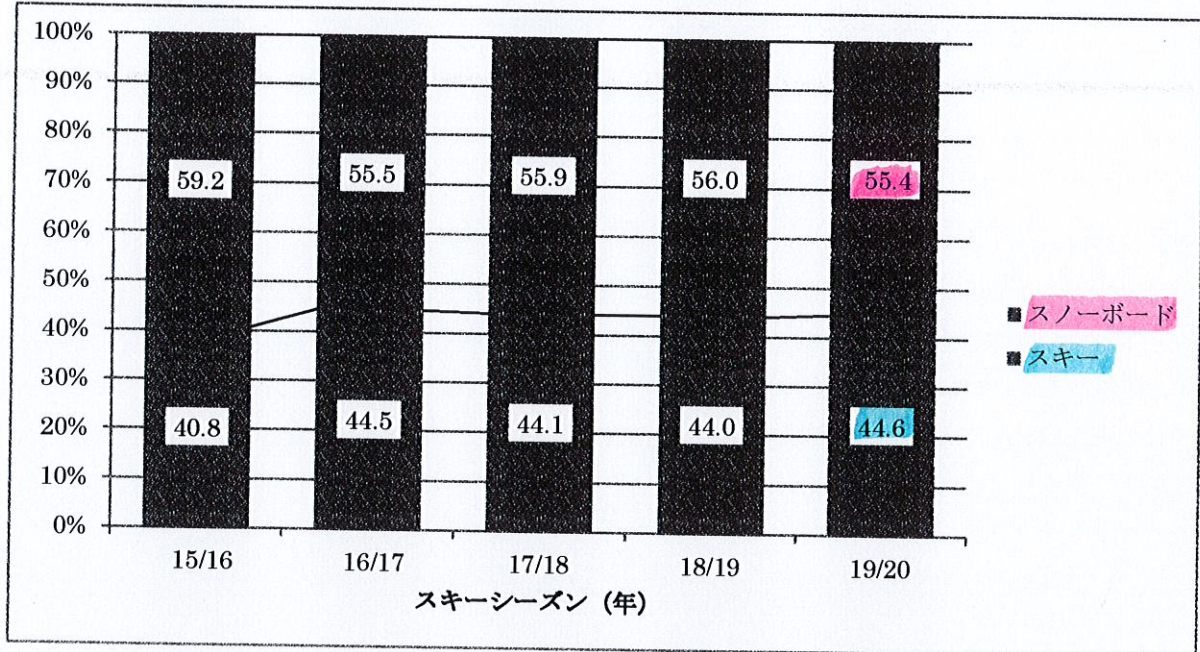

図1. スキーとスノーボードの受傷者割合の推移

#### 5. 用具別受傷者割合

図2は受傷者の使用用具の割合です。昨シーズンと比較すると、アルペンスキーが0.9ポイント増加、フリースタイルスノーボードが0.2ポイント減少しました。

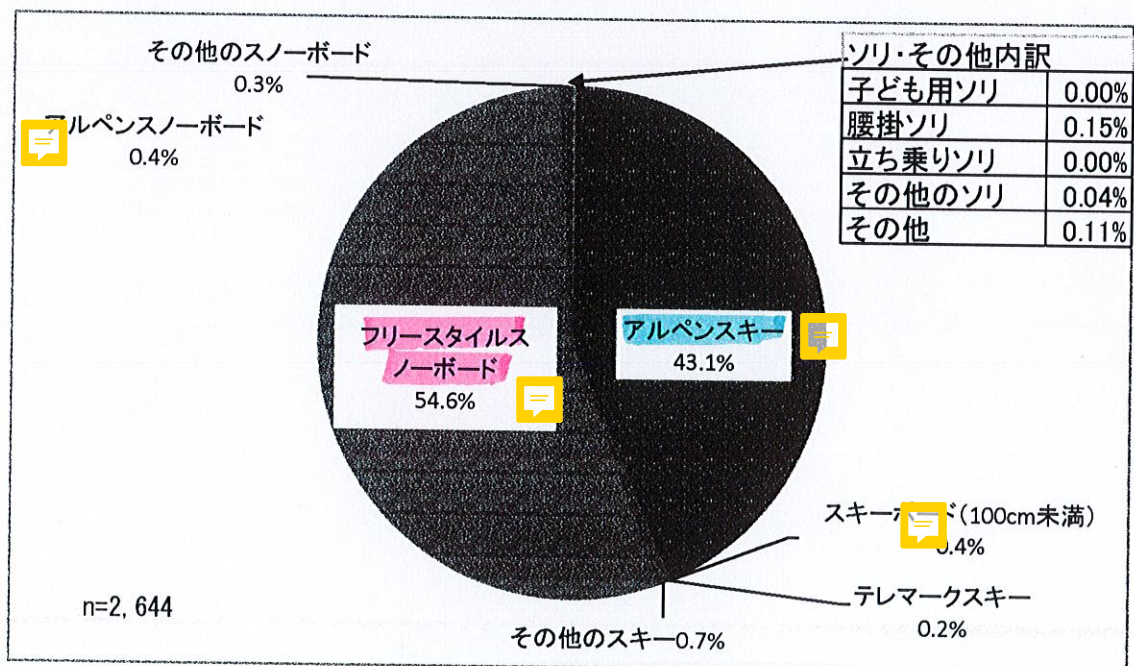

図2. 用具別受傷者の割合



表3は、用具別受傷者の過去5年間の推移を表したものです。今シーズンの受傷者数は昨シーズンより27.3ポイント減少しました。

表3. 用具別受傷者数の推移（人）

| 調査年   | スキー   |            |           |      |      | スノーボード      |      |      | ソリ<br>その他 | 計      |
|-------|-------|------------|-----------|------|------|-------------|------|------|-----------|--------|
|       | アルペン  | スキー<br>ボード | テレマー<br>ク | クロカン | その他  | フリース<br>タイル | アルペン | その他  |           |        |
| 2016年 | 1,213 | 17         | 2         | 1    | 50   | 1,818       | 18   | 26   | 30        | 3,175  |
|       | 38.2% | 0.5%       | 0.1%      | 0.0% | 1.6% | 57.3%       | 0.6% | 0.8% | 0.9%      | 100.0% |
| 2017年 | 1,382 | 14         | 3         | 1    | 19   | 1,747       | 11   | 12   | 6         | 3,195  |
|       | 43.3% | 0.4%       | 0.1%      | 0.0% | 0.6% | 54.7%       | 0.3% | 0.4% | 0.2%      | 100.0% |
| 2018年 | 1,313 | 13         | 4         | 0    | 9    | 1,689       | 4    | 3    | 18        | 3,053  |
|       | 43.0% | 0.4%       | 0.1%      | 0.0% | 0.3% | 55.3%       | 0.1% | 0.1% | 0.6%      | 100.0% |
| 2019年 | 1,531 | 26         | 2         | 3    | 26   | 1,985       | 18   | 17   | 16        | 3,624  |
|       | 42.2% | 0.7%       | 0.1%      | 0.1% | 0.7% | 54.8%       | 0.5% | 0.5% | 0.4%      | 100.0% |
| 2020年 | 1,137 | 11         | 4         | 0    | 18   | 1,440       | 10   | 8    | 8         | 2,636  |
|       | 43.1% | 0.4%       | 0.2%      | 0.0% | 0.7% | 54.6%       | 0.4% | 0.3% | 0.3%      | 100.0% |

#### 6. リフト等の輸送人員

スキーヤーとスノーボーダーの推計輸送人員は、各スキー場から報告があった2月の輸送延べ人員とスキーヤーとスノーボーダーの入り込みの比率から推計したものです。

表4はスキーヤーとスノーボーダーの推計輸送人員の推移です。2020年2月の輸送延べ人員は、前年度と比べて13.1ポイント減少しました。内訳はスキーヤーが15.3ポイント減少、スノーボーダーは10.3ポイント減少しました。

表4. スキーヤーとスノーボーダーの推計輸送人員の推移（人）

| 調査年<br>(2月) | スキーヤー      | 対前年<br>比 | スノーボー<br>ダー | 対前年比    | 総輸送人員      | 対前年比    |
|-------------|------------|----------|-------------|---------|------------|---------|
| 2016年       | 17,023,802 | 0.71%    | 14,097,941  | -4.14%  | 31,121,743 | -1.55%  |
| 2017年       | 15,513,064 | -8.87%   | 13,693,128  | -2.87%  | 29,206,192 | -6.16%  |
| 2018年       | 18,455,657 | 18.97%   | 13,574,169  | -0.87%  | 32,029,826 | 9.67%   |
| 2019年       | 17,152,397 | -7.06%   | 13,630,601  | 0.42%   | 30,782,998 | -3.89%  |
| 2020年       | 14,529,151 | -15.29%  | 12,223,262  | -10.32% | 26,757,377 | -13.08% |

※ 調査年により協力スキー場数に変動があります。



図3はスキヤーとスノーボーダーの推計輸送人員の割合です。スキヤーは1.5ポイント減、スノーボーダーは1.4ポイント増となりました。

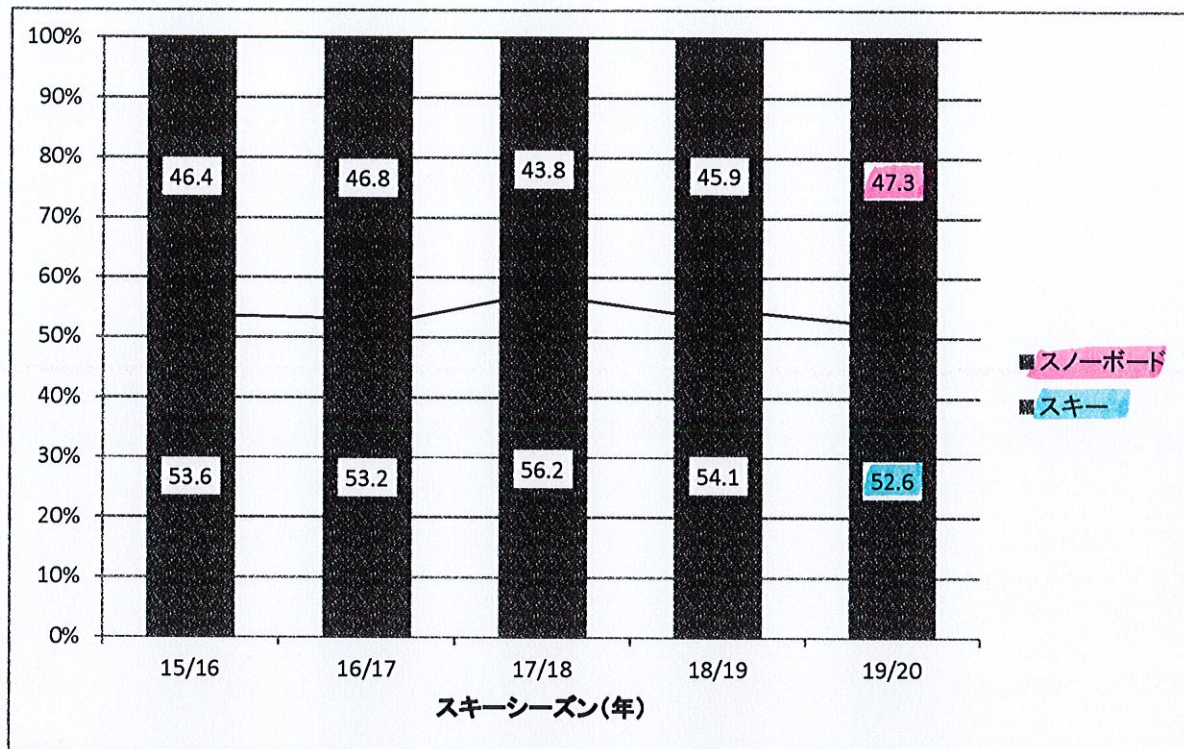

図3. スキヤーとスノーボーダーの推計輸送人員の割合の推移

## 7. 受傷率

最近10シーズンの、スキー・スノーボード・ソリその他を合わせた受傷率の推移を図4に示しました。昨シーズンは過去7シーズンで最高値(0.0116)を示しましたが、今シーズンは過去10シーズンで最低値(0.0093)となりました。

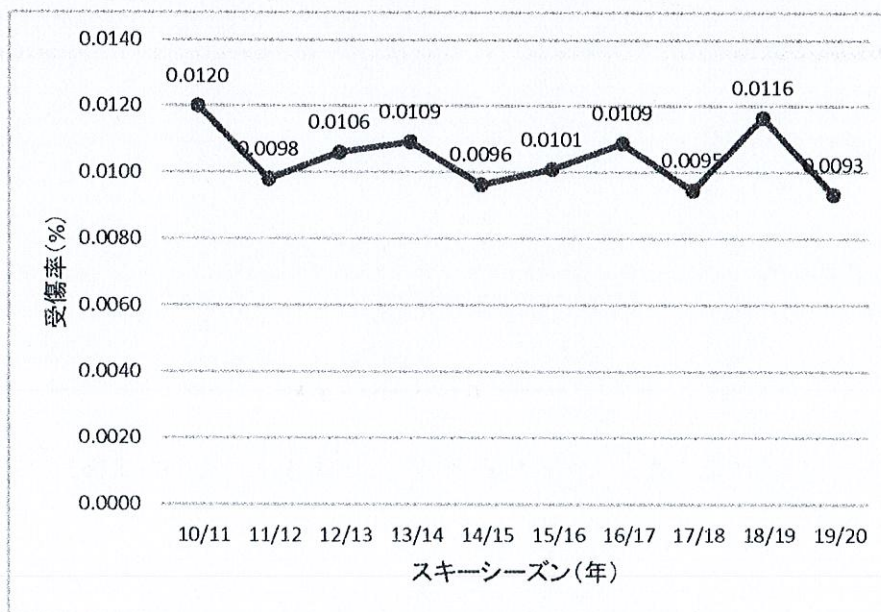

図4. 最近10シーズンの受傷率の推移



## 8. スキー受傷率およびスノーボード受傷率

図 5-1 に最近 10 シーズンのスキー及びスノーボードの受傷率の推移を示しました。

スキーは、11/12 シーズンに最低値 (0.0067%) を記録した後は微増傾向が続いていましたが、昨シーズンは過去 10 シーズンで最も高い値 (0.0096%) を記録し、今シーズンは平均値 (0.0079%) 近くに回復しました。スノーボードは、過去最低値 (0.0105%) を記録しました。

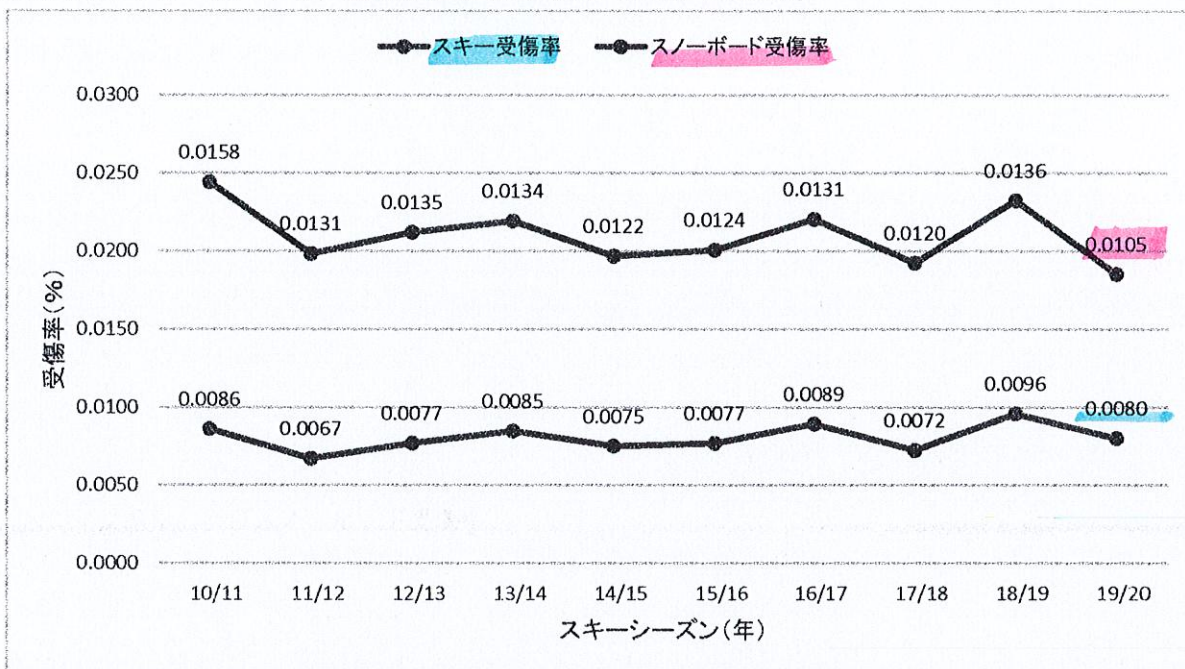

図 5-1. スキー及びスノーボード受傷率の推移

図 5-2 に、過去 20 年間の受傷率の推移を示しました。スノーボードの受傷率は明らかな減少傾向を示しているものの、スキーはほぼ横ばい(受傷率の改善が見られない)であることから、新たな対策が必要であることがうかがえます。

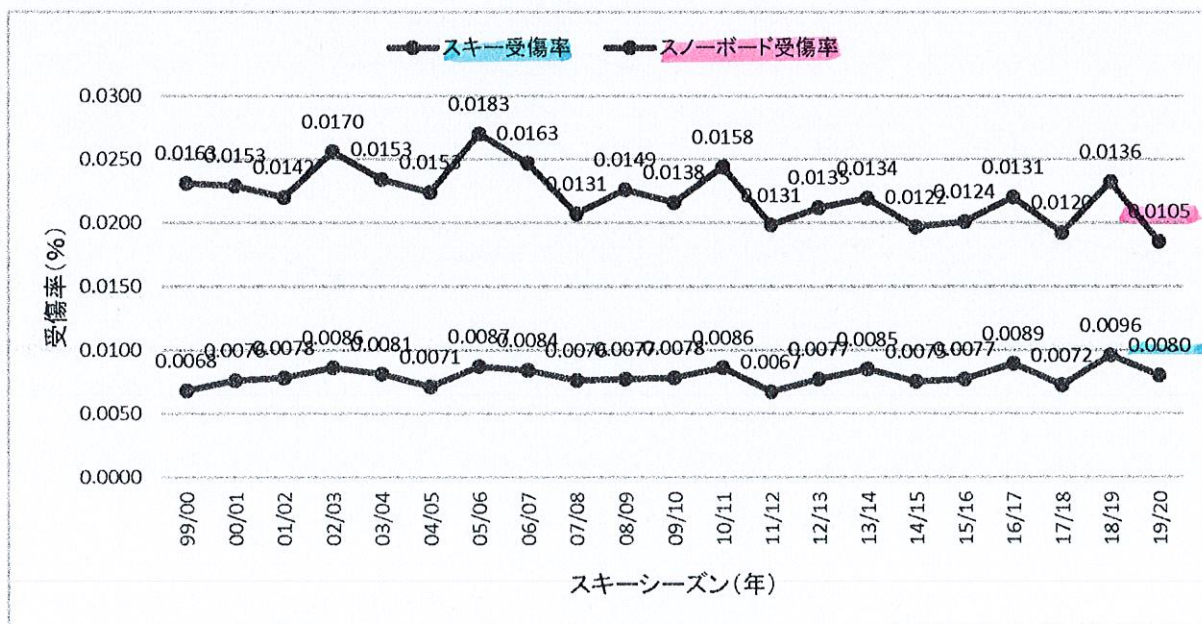

図 5-2. スキー・スノーボード受傷率の推移 (過去 20 年間)



図5-3は、輸送人員を横軸に、傷害者数を縦軸にプロット・直線回帰分析したものです。分析結果より、受傷者数の変動は輸送人員の変動から、スキーヤーで76.5%、スノーボーダーで49.6%説明できることを表しています。すなわち、傷害者数の変動は輸送人員の変動から5～8割は説明できます。

尚、赤（スノーボード）の破線で囲まれたスキー場は、直線回帰式から大きく外れており、スキー場特有の問題点を抱えているか、特別な対策が必要なスキー場と考えられます。

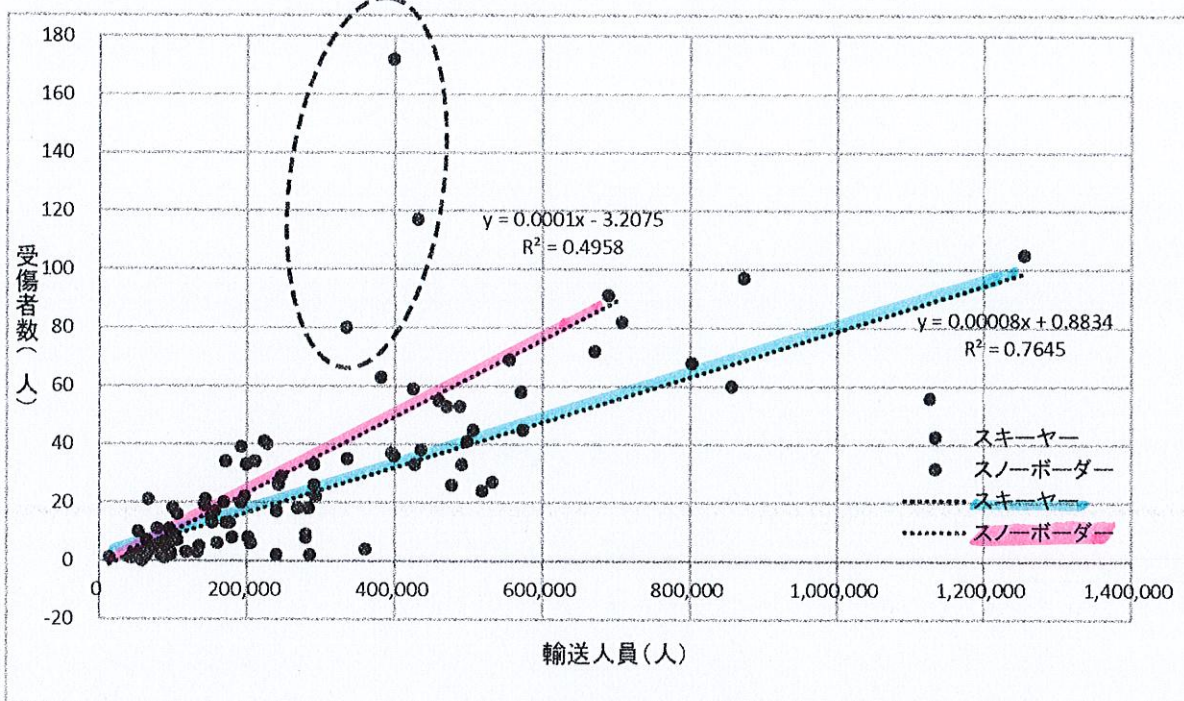

図5-3. 輸送人員と傷害者数

本報告書では、受傷率を輸送延べ人員に対する受傷者数の割合として計算しています。

例えば受傷率0.010%とは、リフト・ゴンドラ等の輸送人員1万人あたり受傷者1人を指し、10万人あたりでは10人、100万人あたりでは100人となります。

スキー受傷率は、スキーヤー推計輸送人員に対するスキー受傷者数の割合、スノーボード受傷率は、スノーボーダー推計輸送人員に対するスノーボード受傷者数の割合を示したものです。

なお、提出された集計表に書かれた傷害件数と調査用紙（個票）の数が一致しないスキー場やケガ以外の疾病などが含まれている場合があるので、受傷率の計算は可能な限り実際の傷害件数を採用しました。したがって、スキー場から報告された傷害件数と本報告書の傷害件数とが異なる場合がありますのでご了承ください。

表5は輸送人員、入り込み比率、及びスキー・スノーボード別推計輸送人員です。

各スキー場の受傷者数と受傷率は、表6に示しました。受傷率は、総輸送人員に対する受傷者数の割合を示したものです。

表7は、スキーヤー・スノーボーダーの入り込み比率の推移を示したものです。

表 5. 輸送人員、入り込み比率及びスキー・スノーボード別推計輸送人員

| 番号 | スキー場           | (A)                | (B)       |      | (C)        |            | (D=AxB) | (E=AxC) |
|----|----------------|--------------------|-----------|------|------------|------------|---------|---------|
|    |                | 輸送人員(人)<br>2020年2月 | 入り込み比率(%) |      | 推計輸送人員(人)  |            |         |         |
|    |                |                    | スキーヤー     | ボーダー | スキーヤー      | ボーダー       |         |         |
| 1  | ニセコグランヒラフ      | 1,426,076          | 60        | 40   | 855,646    | 570,430    |         |         |
| 2  | 朝里川温泉スキー場      | 224,183            | 80        | 20   | 179,346    | 44,837     |         |         |
| 3  | サッポロテイネススキー場   | 796,805            | 65        | 35   | 517,923    | 278,882    |         |         |
| 4  | 札幌国際スキー場       | 372,442            | 54        | 46   | 201,119    | 171,323    |         |         |
| 5  | ルスツリゾートスキー場    | 1,175,800          | 57        | 43   | 670,206    | 505,594    |         |         |
| 6  | 富良野スキー場        | 594,534            | 67        | 33   | 398,338    | 196,196    |         |         |
| 7  | 大鱈温泉スキー場       | 107,521            | 87        | 13   | 93,866     | 13,655     |         |         |
| 8  | 安比高原スキー場       | 533,402            | 63        | 37   | 334,976    | 198,426    |         |         |
| 9  | みやぎ蔵王白石スキー場    | 106,610            | 60        | 40   | 63,966     | 42,644     |         |         |
| 10 | みやぎ蔵王えぼしスキー場   | 237,000            | 40        | 60   | 94,800     | 142,200    |         |         |
| 11 | 猪苗代スキー場        | 165,824            | 60        | 40   | 99,494     | 66,330     |         |         |
| 12 | 裏磐梯猫魔スキー場      | 211,195            | 50        | 50   | 105,598    | 105,598    |         |         |
| 13 | アルツ磐梯スキー場      | 377,570            | 40        | 60   | 151,028    | 226,542    |         |         |
| 14 | 会津高原たかつえスキー場   | 398,921            | 60        | 40   | 239,353    | 159,568    |         |         |
| 15 | たざわ湖スキー場       | 254,174            | 60        | 40   | 152,504    | 101,670    |         |         |
| 16 | 蔵王温泉スキー場       | 1,197,000          | 67        | 33   | 801,990    | 395,010    |         |         |
| 17 | 苗場スキー場         | 992,872            | 50        | 49   | 497,429    | 490,479    |         |         |
| 18 | 石打丸山スキー場       | 966,898            | 55        | 45   | 531,794    | 435,104    |         |         |
| 19 | 舞子スノーリゾート      | 711,026            | 40        | 60   | 284,410    | 426,616    |         |         |
| 20 | 上越国際スキー場       | 818,510            | 70        | 30   | 572,957    | 245,553    |         |         |
| 21 | 六日町八海山スキー場     | 120,731            | 63        | 37   | 76,181     | 44,550     |         |         |
| 22 | 斑尾高原スキー場       | 556,498            | 40        | 60   | 222,599    | 333,899    |         |         |
| 23 | 野沢温泉スキー場       | 1,681,200          | 67        | 33   | 1,126,404  | 554,796    |         |         |
| 24 | 志賀高原スキー場       | 1,742,054          | 72        | 28   | 1,254,279  | 487,775    |         |         |
| 25 | 白馬五竜スキー場       | 1,088,136          | 35        | 65   | 380,848    | 707,288    |         |         |
| 26 | 白馬八方尾根スキー場     | 1,342,312          | 65        | 35   | 872,503    | 469,809    |         |         |
| 27 | 白馬岩岳スノーフィールド   | 383,175            | 50        | 50   | 191,588    | 191,588    |         |         |
| 28 | 裾池高原スキー場       | 1,147,967          | 40        | 60   | 459,187    | 688,780    |         |         |
| 29 | 立山山麓スキー場       | 161,315            | 60        | 40   | 96,789     | 64,526     |         |         |
| 30 | 白山一里野温泉スキー場    | 224,968            | 60        | 40   | 134,981    | 89,987     |         |         |
| 31 | 草津国際スキー場       | 435,426            | 64        | 36   | 279,108    | 156,318    |         |         |
| 32 | スノーパーク尾瀬戸倉     | 195,570            | 60        | 40   | 117,342    | 78,228     |         |         |
| 33 | 万座温泉スキー場       | 258,688            | 68        | 32   | 175,649    | 83,039     |         |         |
| 34 | ハンターマウンテン塩原    | 573,928            | 25        | 75   | 143,482    | 430,446    |         |         |
| 35 | ダイナランド         | 568,487            | 30        | 70   | 170,546    | 397,941    |         |         |
| 36 | SKI JAM 勝山スキー場 | 531,438            | 45        | 55   | 239,147    | 292,291    |         |         |
| 37 | 箱館山スキー場        | 220,631            | 60        | 40   | 132,379    | 88,252     |         |         |
| 38 | ハチ北高原スキー場      | 707,000            | 40        | 60   | 282,800    | 424,200    |         |         |
| 39 | びわ湖バレイスキー場     | 410,000            | 41        | 59   | 168,100    | 241,900    |         |         |
| 40 | 奥神鍋スキー場        | 115,673            | 50        | 50   | 57,837     | 57,837     |         |         |
| 41 | ハチ高原スキー場       | 580,000            | 50        | 50   | 290,000    | 290,000    |         |         |
| 42 | だいせんホワイトリゾート   | 744,907            | 64        | 36   | 476,740    | 268,167    |         |         |
| 43 | 芸北国際スキー場       | 292,002            | 30        | 70   | 87,601     | 204,401    |         |         |
| 44 | 恐羅漢スノーパーク      | 155,188            | 40        | 60   | 62,075     | 93,113     |         |         |
| 45 | 瑞穂ハイランド        | 263,092            | 20        | 80   | 52,618     | 210,474    |         |         |
| 46 | ユートピアサイオト      | 449,628            | 20        | 80   | 89,926     | 359,702    |         |         |
| 47 | 久万スキーランド       | 139,000            | 30        | 70   | 41,700     | 97,300     |         |         |
|    | 合 計            | 26,757,377         |           |      | 14,529,151 | 12,223,262 |         |         |



表 6. 受傷率

| 番号 | スキー場           | (F)     | (G)   | (H)   | (I) | (F/Ax100) | (G/Dx100) | (H/Ex100) |
|----|----------------|---------|-------|-------|-----|-----------|-----------|-----------|
|    |                | 受傷者数(人) |       |       |     | 受傷率(%)    |           |           |
|    |                | 合計      | スキーヤー | ボーダー  | その他 | 合計        | スキーヤー     | ボーダー      |
| 1  | ニセコグランヒラフ      | 118     | 60    | 58    | 0   | 0.0083    | 0.0070    | 0.0102    |
| 2  | 朝里川温泉スキー場      | 9       | 8     | 1     | 0   | 0.0040    | 0.0045    | 0.0022    |
| 3  | サップロティネスキー場    | 33      | 24    | 8     | 1   | 0.0041    | 0.0046    | 0.0029    |
| 4  | 札幌国際スキー場       | 21      | 8     | 13    | 0   | 0.0056    | 0.0040    | 0.0076    |
| 5  | ルスツリゾートスキー場    | 117     | 72    | 45    | 0   | 0.0100    | 0.0107    | 0.0089    |
| 6  | 富良野スキー場        | 58      | 36    | 22    | 0   | 0.0098    | 0.0090    | 0.0112    |
| 7  | 大鱈温泉スキー場       | 8       | 7     | 1     | 0   | 0.0074    | 0.0075    | 0.0073    |
| 8  | 安比高原スキー場       | 68      | 35    | 33    | 0   | 0.0127    | 0.0104    | 0.0166    |
| 9  | みやぎ蔵王白石スキー場    | 9       | 7     | 1     | 1   | 0.0084    | 0.0109    | 0.0023    |
| 10 | みやぎ蔵王えぼしスキー場   | 30      | 11    | 19    | 0   | 0.0127    | 0.0116    | 0.0134    |
| 11 | 猪苗代スキー場        | 39      | 18    | 21    | 0   | 0.0235    | 0.0181    | 0.0317    |
| 12 | 裏磐梯猫魔スキー場      | 23      | 7     | 16    | 0   | 0.0109    | 0.0066    | 0.0152    |
| 13 | アルツ磐梯スキー場      | 55      | 15    | 40    | 0   | 0.0146    | 0.0099    | 0.0177    |
| 14 | 会津高原たかつえスキー場   | 8       | 2     | 6     | 0   | 0.0020    | 0.0008    | 0.0038    |
| 15 | たざわ湖スキー場       | 22      | 13    | 9     | 0   | 0.0087    | 0.0085    | 0.0089    |
| 16 | 蔵王温泉スキー場       | 105     | 68    | 37    | 0   | 0.0088    | 0.0085    | 0.0094    |
| 17 | 苗場スキー場         | 75      | 41    | 33    | 1   | 0.0076    | 0.0082    | 0.0067    |
| 18 | 石打丸山スキー場       | 65      | 27    | 38    | 0   | 0.0067    | 0.0051    | 0.0087    |
| 19 | 舞子スノーリゾート      | 35      | 2     | 33    | 0   | 0.0049    | 0.0007    | 0.0077    |
| 20 | 上越国際スキー場       | 74      | 45    | 29    | 0   | 0.0090    | 0.0079    | 0.0118    |
| 21 | 六日町八海山スキー場     | 6       | 4     | 2     | 0   | 0.0050    | 0.0053    | 0.0045    |
| 22 | 斑尾高原スキー場       | 121     | 41    | 80    | 0   | 0.0217    | 0.0184    | 0.0240    |
| 23 | 野沢温泉スキー場       | 127     | 56    | 69    | 2   | 0.0076    | 0.0050    | 0.0124    |
| 24 | 志賀高原スキー場       | 160     | 105   | 53    | 2   | 0.0092    | 0.0084    | 0.0109    |
| 25 | 白馬五竜スキー場       | 145     | 63    | 82    | 0   | 0.0133    | 0.0165    | 0.0116    |
| 26 | 白馬八方尾根スキー場     | 150     | 97    | 53    | 0   | 0.0112    | 0.0111    | 0.0113    |
| 27 | 白馬岩岳スノーフィールド   | 60      | 20    | 39    | 1   | 0.0157    | 0.0104    | 0.0204    |
| 28 | 桐池高原スキー場       | 146     | 55    | 91    | 0   | 0.0127    | 0.0120    | 0.0132    |
| 29 | 立山山麓スキー場       | 5       | 3     | 2     | 0   | 0.0031    | 0.0031    | 0.0031    |
| 30 | 白山一里野温泉スキー場    | 10      | 5     | 5     | 0   | 0.0044    | 0.0037    | 0.0056    |
| 31 | 草津国際スキー場       | 26      | 9     | 17    | 0   | 0.0060    | 0.0032    | 0.0109    |
| 32 | スノーパーク尾瀬戸倉     | 14      | 3     | 11    | 0   | 0.0072    | 0.0026    | 0.0141    |
| 33 | 万座温泉スキー場       | 15      | 13    | 2     | 0   | 0.0058    | 0.0074    | 0.0024    |
| 34 | ハンターマウンテン塩原    | 140     | 21    | 117   | 2   | 0.0244    | 0.0146    | 0.0272    |
| 35 | ダイナランド         | 206     | 34    | 172   | 0   | 0.0362    | 0.0199    | 0.0432    |
| 36 | SKI JAM 勝山スキー場 | 39      | 17    | 22    | 0   | 0.0073    | 0.0071    | 0.0075    |
| 37 | 箱館山スキー場        | 4       | 3     | 1     | 0   | 0.0018    | 0.0023    | 0.0011    |
| 38 | ハチ北高原スキー場      | 77      | 18    | 59    | 0   | 0.0109    | 0.0064    | 0.0139    |
| 39 | びわ湖バレイスキー場     | 46      | 20    | 26    | 0   | 0.0112    | 0.0119    | 0.0107    |
| 40 | 奥神鍋スキー場        | 0       | 0     | 0     | 0   | 0.0000    | 0.0000    | 0.0000    |
| 41 | ハチ高原スキー場       | 59      | 33    | 26    | 0   | 0.0102    | 0.0114    | 0.0090    |
| 42 | だいせんホワイトリゾート   | 44      | 26    | 18    | 0   | 0.0059    | 0.0055    | 0.0067    |
| 43 | 芸北国際スキー場       | 8       | 2     | 6     | 0   | 0.0027    | 0.0023    | 0.0029    |
| 44 | 恐羅漢スノーパーク      | 7       | 3     | 4     | 0   | 0.0045    | 0.0048    | 0.0043    |
| 45 | 瑞穂ハイランド        | 44      | 10    | 34    | 0   | 0.0167    | 0.0190    | 0.0162    |
| 46 | ユートピアサイオト      | 10      | 6     | 4     | 0   | 0.0022    | 0.0067    | 0.0011    |
| 47 | 久万スキーランド       | 3       | 1     | 2     | 0   | 0.0022    | 0.0024    | 0.0021    |
|    | 合 計            | 2,644   | 1,174 | 1,460 | 10  | 0.0093    | 0.0080    | 0.0105    |

表 7. スキーヤー・スノーボーダーの入り込み比率の推移  
(スキーヤーの比率：スノーボーダーの比率)

(スキーヤー：スノーボーダー)

| 番号 | スキー場           | 2016年2月     | 2017年2月     | 2018年2月     | 2019年2月     | 2020年2月     |
|----|----------------|-------------|-------------|-------------|-------------|-------------|
| 1  | ニセコグランヒラフ      | 60 : 40     | 60 : 40     | 60 : 40     | 60 : 40     | 60 : 40     |
| 2  | 朝里川温泉スキー場      | 80 : 20     | 80 : 40     | 80 : 40     | 80 : 40     | 80 : 20     |
| 3  | サップロテイネススキー場   | 80 : 40     | 80 : 40     | 85 : 35     | 85 : 35     | 85 : 35     |
| 4  | 札幌国際スキー場       | 55 : 45     | 53 : 47     | 53 : 47     | 53 : 47     | 54 : 46     |
| 5  | ルスツリゾートスキー場    | 54 : 46     | 55 : 45     | 60 : 40     | 56 : 40     | 57 : 43     |
| 6  | 富良野スキー場        | 84 : 16     | 85 : 17     | 84 : 17     | 89 : 17     | 87 : 33     |
| 7  | 大鱈温泉スキー場       | 83 : 7      | 84 : 7      | 88 : 12     | 89 : 12     | 87 : 13     |
| 8  | 安比高原スキー場       | 76 : 24     | 71 : 29     | 71 : 30     | 66 : 30     | 63 : 37     |
| 9  | みやぎ蔵王白石スキー場    | 60 : 40     | 60 : 40     | 60 : 40     | 60 : 40     | 60 : 40     |
| 10 | みやぎ蔵王えぼしスキー場   | 60 : 60     | 50 : 50     | 50 : 50     | 40 : 50     | 40 : 60     |
| 11 | 猪苗代スキー場        | 40 : 60     | 50 : 50     | 60 : 40     | 60 : 40     | 60 : 40     |
| 12 | 裏磐梯猫魔スキー場      | 40 : 60     | 70 : 30     | 50 : 50     | 50 : 50     | 50 : 50     |
| 13 | アルツ磐梯スキー場      | 60 : 40     | 60 : 60     | 40 : 60     | 40 : 60     | 40 : 60     |
| 14 | 会津高原たかつえスキー場   | 80 : 40     | 40 : 40     | 50 : 50     | 60 : 50     | 80 : 40     |
| 15 | たざわ湖スキー場       | 74 : 26     | 70 : 30     | 70 : 30     | 50 : 30     | 80 : 40     |
| 16 | 蔵王温泉スキー場       | 87 : 33     | 88 : 31     | 87 : 33     | 88 : 33     | 87 : 33     |
| 17 | 苗場スキー場         | 60 : 40     | 45 : 55     | 32 : 48     | 63 : 48     | 50 : 49     |
| 18 | 石打丸山スキー場       | 60 : 50     | 60 : 50     | 60 : 50     | 60 : 50     | 55 : 45     |
| 19 | 舞子スノーリゾート      | 43 : 57     | 23 : 77     | 38 : 61     | 40 : 61     | 40 : 60     |
| 20 | 上越国際スキー場       | 40 : 60     | 60 : 40     | 60 : 40     | 70 : 40     | 70 : 30     |
| 21 | 六日町八海山スキー場     |             |             |             | 57 : 65     | 63 : 37     |
| 22 | 斑尾高原スキー場       | 60 : 40     | 52 : 47     | 55 : 45     | 55 : 45     | 40 : 60     |
| 23 | 野沢温泉スキー場       | 85 : 35     | 87 : 33     | 80 : 35     | 84 : 35     | 87 : 33     |
| 24 | 志賀高原スキー場       | 55 : 45     | 75 : 24     | 71 : 29     | 65 : 29     | 72 : 28     |
| 25 | 白馬五竜スキー場       | 65 : 35     | 60 : 40     | 60 : 40     | 60 : 40     | 35 : 65     |
| 26 | 白馬八方尾根スキー場     | 78 : 22     | 70 : 30     | 70 : 30     | 70 : 30     | 85 : 35     |
| 27 | 白馬岩岳スノーフィールド   | 30 : 70     | 52 : 48     | 51 : 49     | 55 : 49     | 50 : 50     |
| 28 | 裾池高原スキー場       | 70 : 30     | 40 : 60     | 40 : 60     | 40 : 60     | 40 : 60     |
| 29 | 立山山麓スキー場       | 50 : 50     | 50 : 50     | 60 : 40     | 60 : 40     | 60 : 40     |
| 30 | 白山一里野温泉スキー場    | 60 : 40     | 60 : 50     | 70 : 30     | 60 : 30     | 80 : 40     |
| 31 | 草津国際スキー場       | 84 : 36     | 84 : 36     | 71 : 29     | 65 : 29     | 64 : 36     |
| 32 | スノーパーク尾瀬戸倉     | 50 : 60     | 45 : 55     | 45 : 55     | 45 : 55     | 50 : 40     |
| 33 | 万座温泉スキー場       | 71 : 29     | 70 : 30     | 70 : 30     | 67 : 30     | 68 : 32     |
| 34 | ハンターマウンテン塩原    | 30 : 70     | 40 : 60     | 30 : 70     | 30 : 70     | 25 : 75     |
| 35 | ダイナランド         | 32 : 68     | 30 : 70     | 35 : 65     | 35 : 65     | 30 : 70     |
| 36 | SKI JAM 勝山スキー場 | 44 : 56     | 45 : 55     | 60 : 50     | 48 : 50     | 45 : 55     |
| 37 | 箱館山スキー場        | 67 : 33     | 65 : 35     | 71 : 29     | 73 : 29     | 80 : 40     |
| 38 | ハチ北高原スキー場      | 35 : 62     | 30 : 70     | 60 : 60     | 35 : 60     | 40 : 60     |
| 39 | びわ湖パレイススキー場    | 35 : 65     | 40 : 60     | 42 : 57     | 36 : 57     | 41 : 59     |
| 40 | 奥神鍋スキー場        | 40 : 60     | 60 : 50     | 50 : 50     | 60 : 50     | 50 : 50     |
| 41 | ハチ高原スキー場       | 60 : 50     | 40 : 60     | 60 : 40     | 60 : 40     | 50 : 50     |
| 42 | だいせんホワイトリゾート   | 66 : 34     | 35 : 65     | 72 : 28     | 65 : 28     | 64 : 36     |
| 43 | 芸北国際スキー場       | 40 : 60     | 38 : 62     | 30 : 70     | 30 : 70     | 30 : 70     |
| 44 | 恐羅漢スノーパーク      | 40 : 60     | 40 : 60     | 40 : 60     | 40 : 60     | 40 : 60     |
| 45 | 瑞穂ハイランド        | 32 : 68     | 40 : 60     | 40 : 60     | 29 : 60     | 20 : 80     |
| 46 | ユートピアサイオト      | 40 : 60     | 40 : 60     | 60 : 40     | 30 : 40     | 20 : 80     |
| 47 | 久万スキーランド       | 18 : 83     | 19 : 81     | 68 : 32     | 33 : 32     | 30 : 70     |
|    | 平均             | 54.8 : 45.7 | 53.2 : 46.8 | 56.6 : 43.4 | 54.1 : 43.8 | 52.6 : 47.3 |

## 9. 受傷時間帯

図6は時刻毎に発生した受傷数を示したものです。スキー場内のケガ全体では11時～12時と14～15時に多発しています。スキーもスノーボードも11時台が一番多く発生していました。時間帯による受傷数に2峰性が観られる原因として、混雑、雪質や雪の状態の変化、疲労など人的・環境的要因が影響しているものと考えられます。12時と13時台が減少しているのは、昼食時間帯のためと考えられます。受傷数が多い時間帯（特に昼食時間帯前）は注意して行動しましょう。

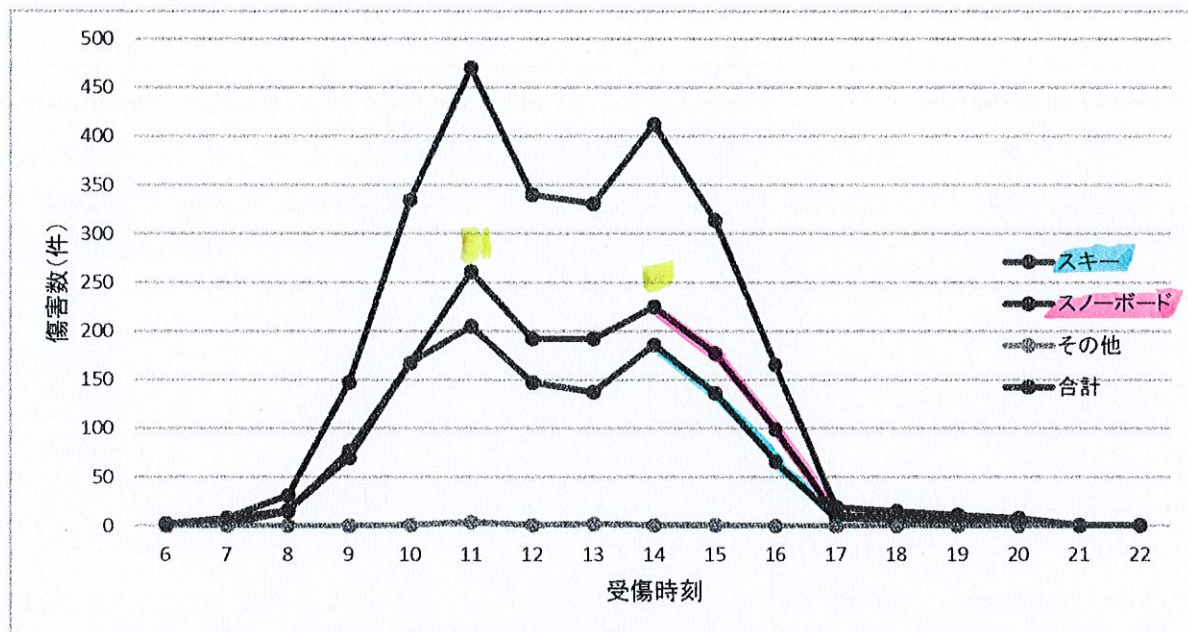

図6. 受傷時間帯

## 10. 天 候

図 7-1 は受傷時の天候です。晴れが 46.1%と約半数を占めました。晴れた日にはスキー場の入込が多く、スピードも出やすくなるので、天候が傷害発生の間接的原因の一つと思われます。

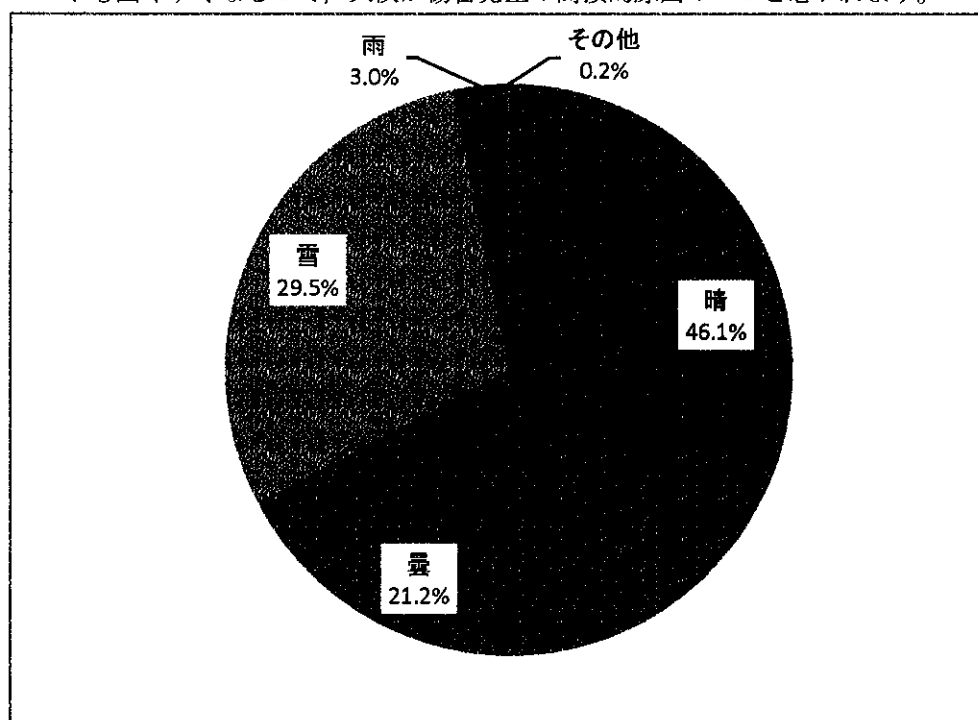

図 7-1. 天 候

図 7-2 は、2 月の傷害発生数と天候の内訳を示しています。グラフから、傷害発生数は、休日は平日の 2~3 倍多く、日曜日よりは土曜日が多く、休日が晴天だと傷害発生数も多いことがわかります。今シーズンの 3 連休初日は雨のところが多く、例年より傷害発生数が少なくなりました。

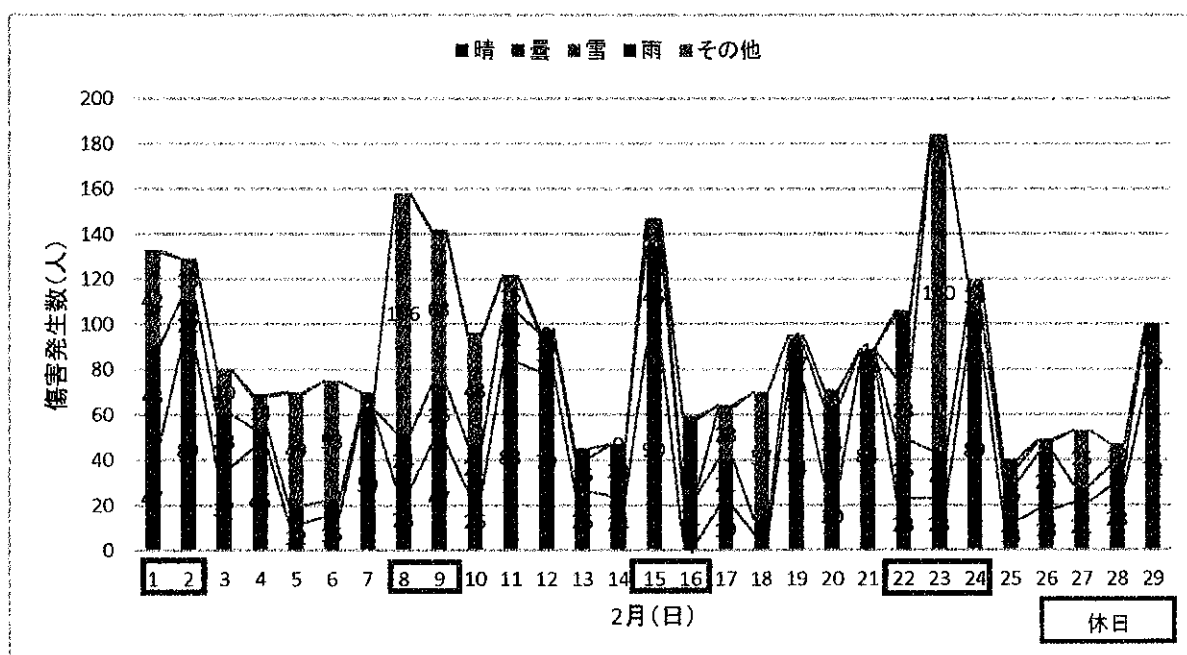

図7-2. 2月の傷害発生数と天候内訳



## 11. 性別

図8は受傷者の性別を示したものです。「合計」とはスキー、スノーボード、ソリ・その他を合計したものです。

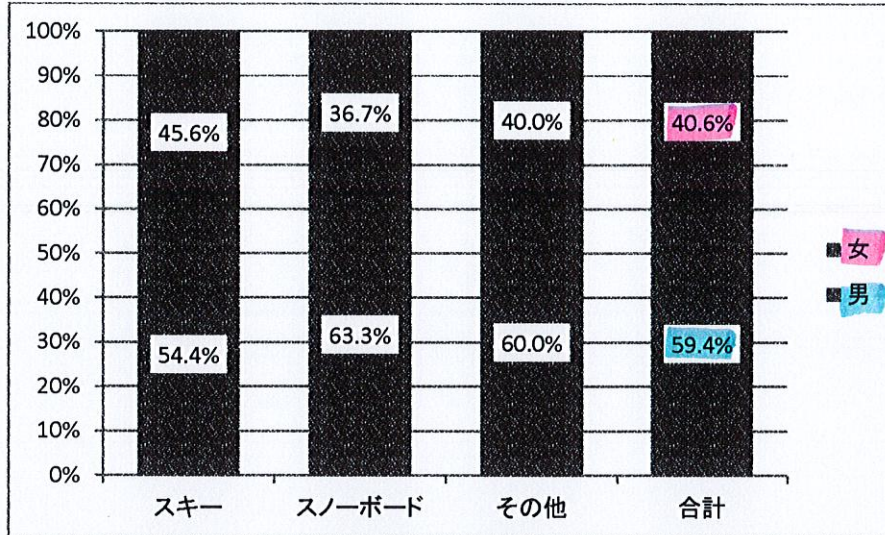

図8. 性別

## 12. 年齢

図9は受傷者の年代を示したものです。スキーの受傷者は、10歳代が17.8%と最も多く、次いで20歳代（17.0%）、50歳代（15.7%）、40歳代（13.5%）、60歳代（11.9%）と続き、80歳以上で1.1%（50歳代以上合計34.0%）と、スノーボードに比べ年齢層が広く、高齢者の割合も多いことが分かります。スノーボードの受傷者は30歳代以下が全体の86.5%を占め、スキーに比べて若年層が圧倒的に多いことがわかります。

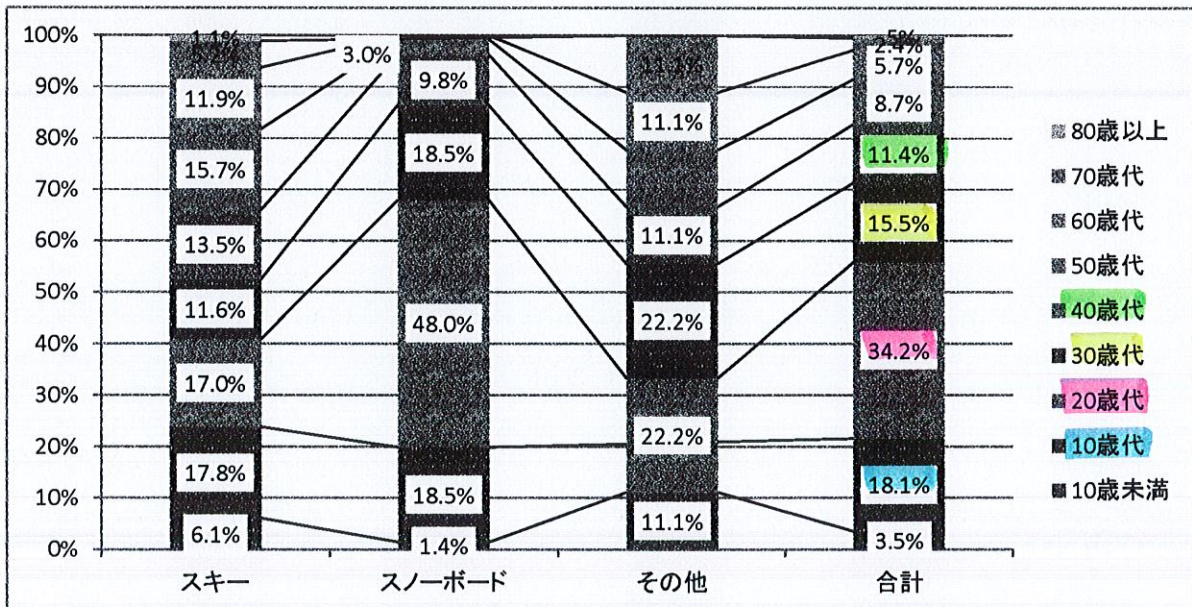

図9. 年齢



### 13. 技能

図10-1 は受傷者の技能を示したものです。スノーボードの受傷者は「初めて・初級者」が53.5%を占めるのに対して、スキーは中級と上級合わせて53.7%を占めています。

「合計」とはスキー、スノーボード及びその他の受傷者を合計したものです。

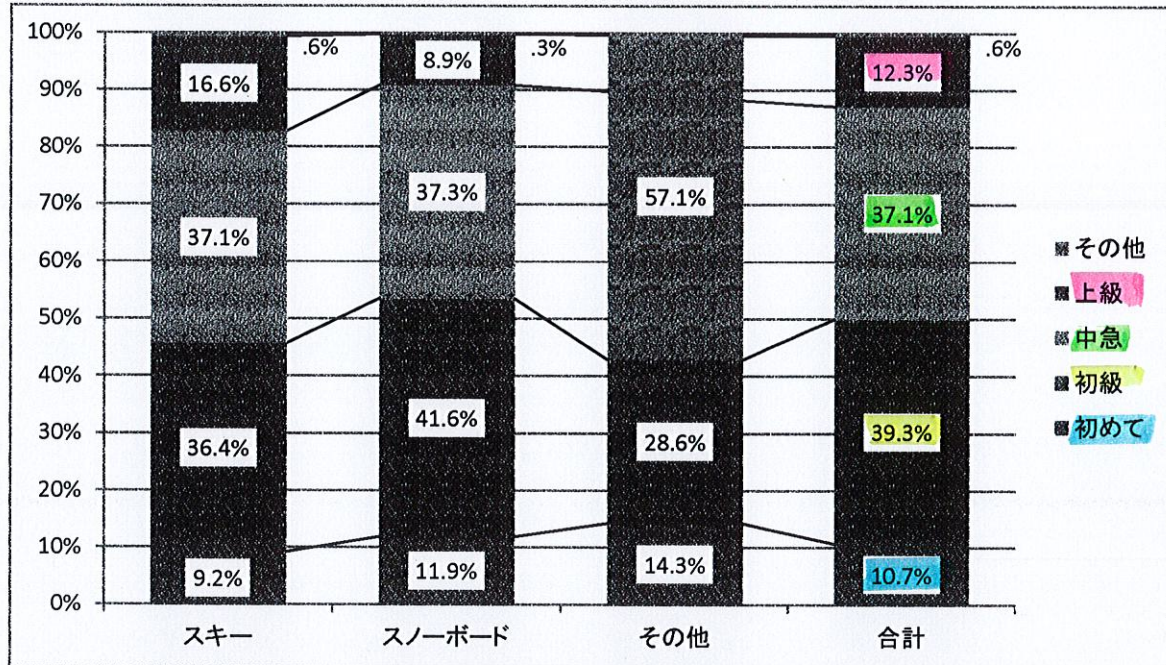

図 10-1. 技能

図10-2 は受傷者の技能を性別に示したものです。スキー・スノーボードの受傷者とも技能レベルは男性が女性より高くなっています。これは、スキー、スノーボードの愛好者の人口そのものが、男性が女性より上級者の占める割合が高いことと関連があると思われます。

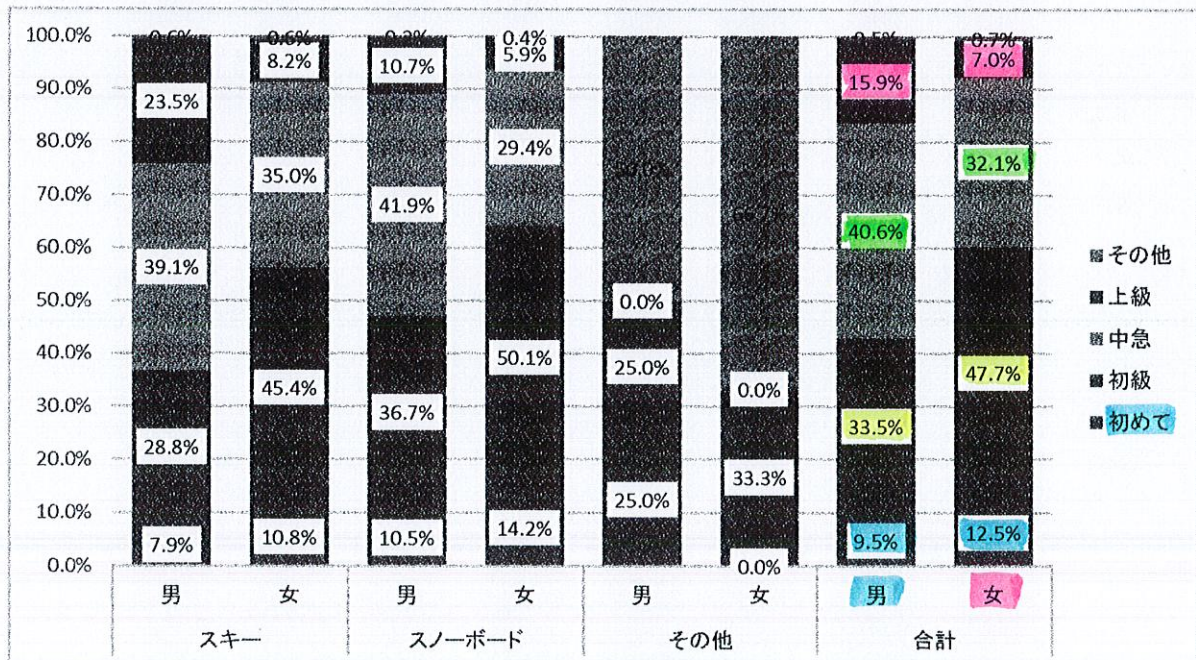

図 10-2. 性別技能



#### 14. 受傷場所

図 11-1 は受傷場所を斜面別に、図 11-2 はパークの種別を示したものです。スノーボードでは、「ワンメイク」での受傷の割合がスキーと比べて4ポイント高くなっています。スノーボードの「その他の場所」では、ボックス、キッカー、FRP、レールが多く見られました。

図 11-3 は、リフト乗り場・乗車中・降り場での傷害数を示し、乗り場より降り場でのケガが多く、特にスノーボーダーで多いことがわかります。

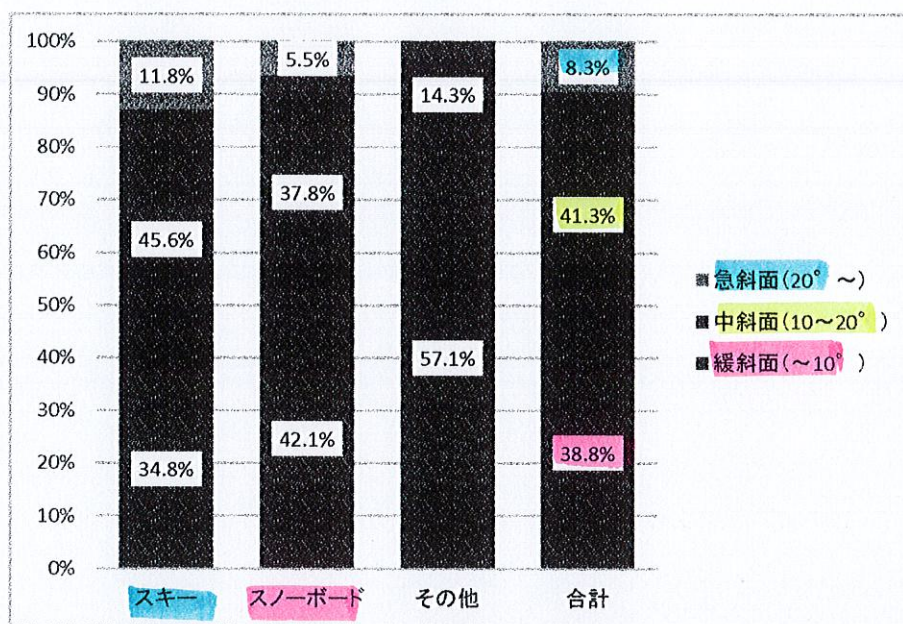

図 11-1. 受傷場所（斜面）

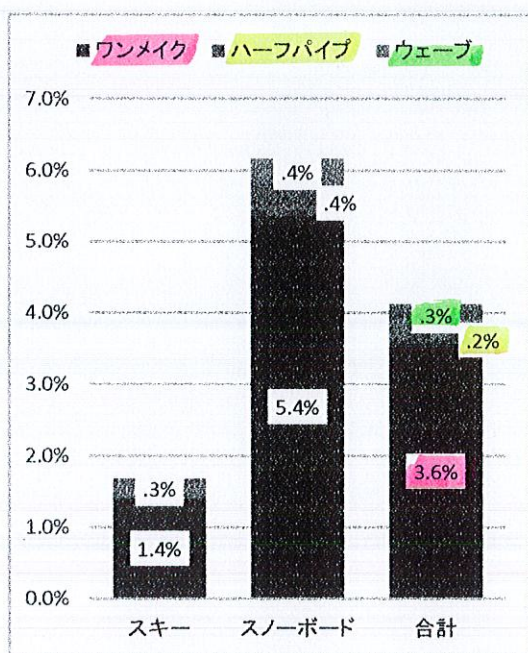

図 11-2. 受傷場所（パーク）

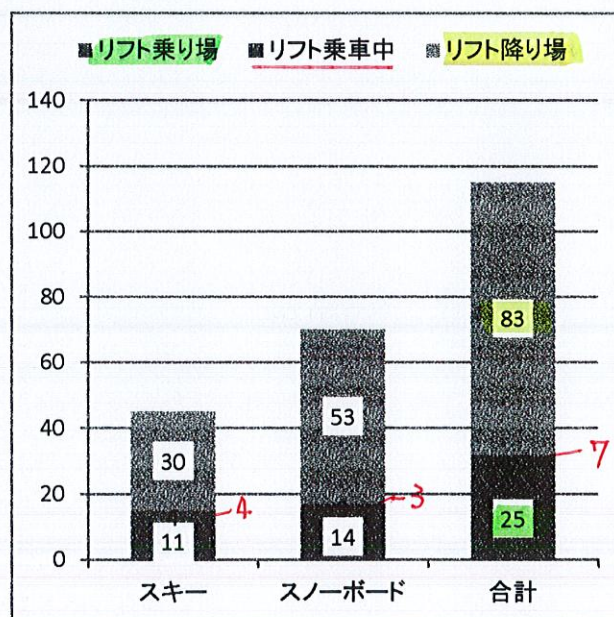

図 11-3. リフト乗り場・乗車中・降り場の傷害数



## 15. 受傷原因

図12-1 は受傷原因を示したものです。スキー、スノーボードともに「自分で転倒」の割合が最も高くなっています。「人と衝突」の割合は、スキーがスノーボードより4.1ポイント高率でした。

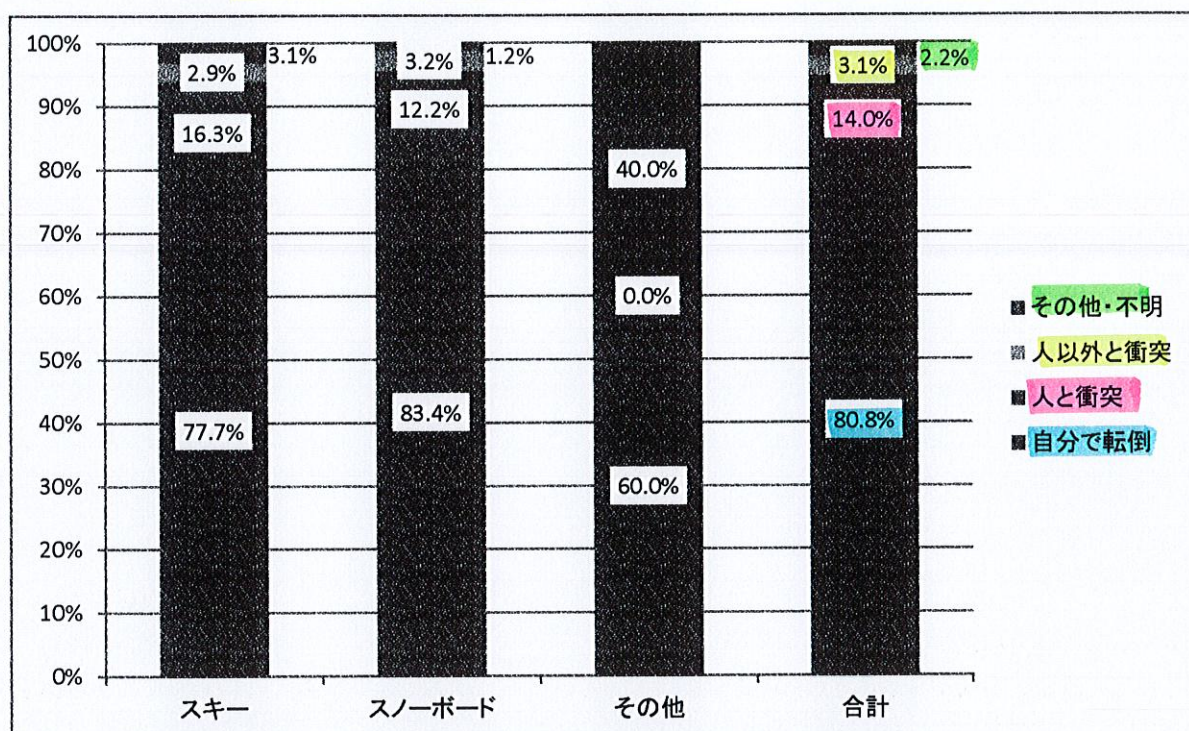

図 12-1. 受傷原因

図 12-2 は受傷原因のうち「自分で転倒」についての内訳です。スキー、スノーボードとも「バランスを崩して転倒」の割合が最も高く、スキーでは 88.2%，スノーボードでは 75.3%を占めました。スノーボードの「ジャンプ失敗」「トリック失敗」は合わせて 11.4%でした。

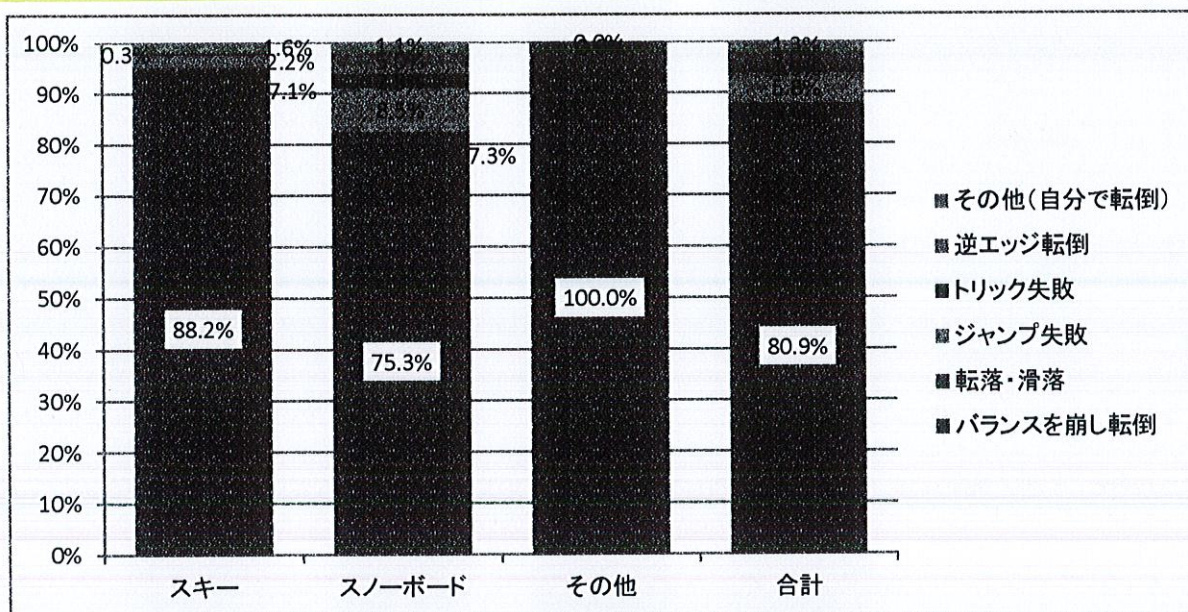

図 12-2. 受傷原因「自分で転倒」の内訳



図12.3 は受傷原因のうち「人と衝突」についての内訳です。スノーボードでは、スノーボーダー同士の衝突が約75.7%と高率でした。それに対してスキーヤーは、「スキーヤー」「スノーボーダー」との衝突は共に約半数を占めました。

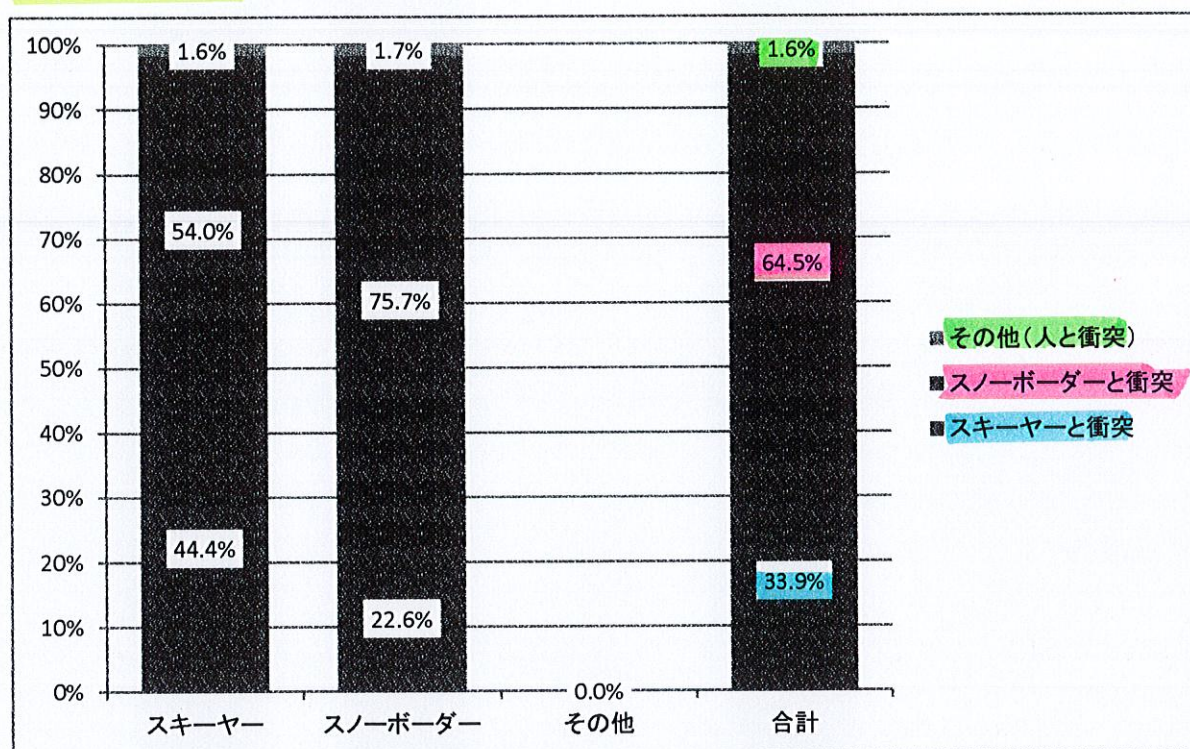

図 12-3. 受傷原因「人と衝突」の内訳

受傷原因のうち「人以外との衝突」で最も多かったのは「立ち木」で、スキー19件、スノーボードで25件でした。次に「その他の物」との衝突も多く、スキー12件、スノーボードで15件でした。

#### ※ 衝突相手の確認について

「人と衝突」したのは366件でした。このうち「相手の確認」の有無の欄に回答した212件中、140件(66.0%)が衝突の相手を「確認している」、72件(34.0%)が「不明」と回答していました。

#### ※ 飲酒について

スキー、スノーボードで飲酒の有無欄に記載があったのは2,065件で、このうち「飲酒」とあったのは45件(2.2%)でした。



## 16. 傷害の部位と種類

傷害の部位と種類は、調査用紙に記入された1番から4番のすべてを合計した受傷数（応答数）です。すなわち、一人で複数箇所（最大4箇所まで）をけがした場合でもすべて集計してあります（重複回答）。図中のnは集計の対象とした受傷数（応答数）です。

### 1) スキーの傷害部位と種類

図13-1 はスキー（アルペンスキー、スキーボード、テレマークスキー、その他のスキー）を合計した傷害の部位です。膝が最も多く（28.4%），肩（11.0%），下腿（10.0%），頭部（7.7%），足首（7.2%）の順に多く受傷していました。この上位5部位で全傷害の64.3%を占めました。

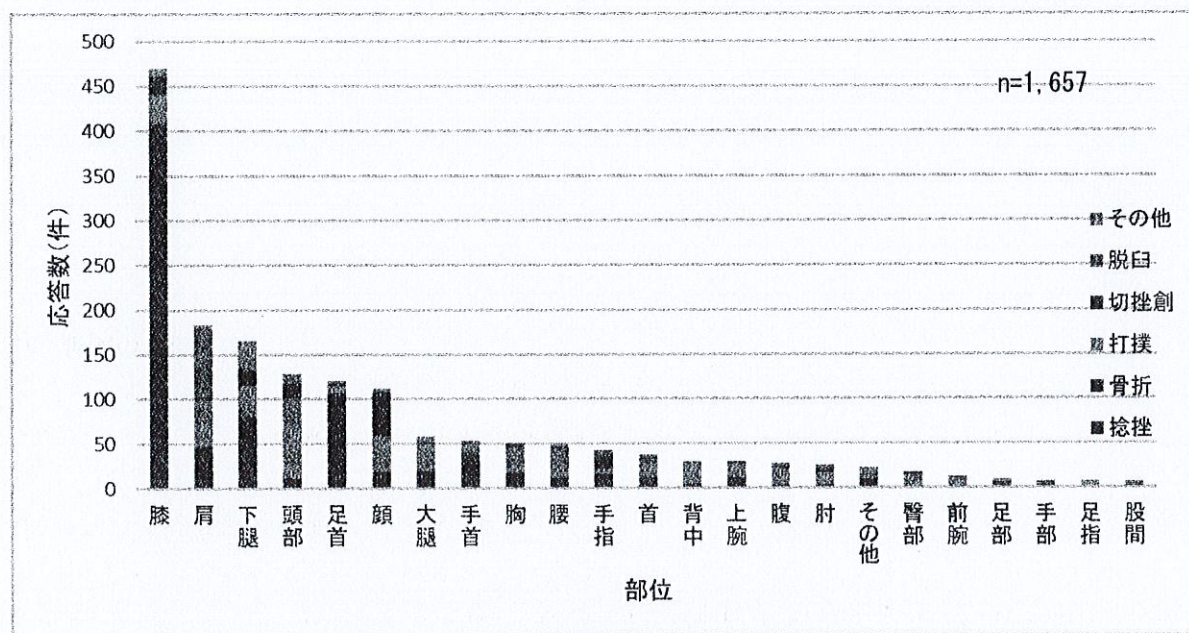

図 13-1. スキーの傷害部位と種類(重複回答)

図13-2 はスキーにおける「自分で転倒」の場合の傷害部位と種類について、上位5部位を示しています。膝が最も多く35.4%を占め、膝の約86%が捻挫、肩の36%が脱臼、下腿の49%が骨折でした。

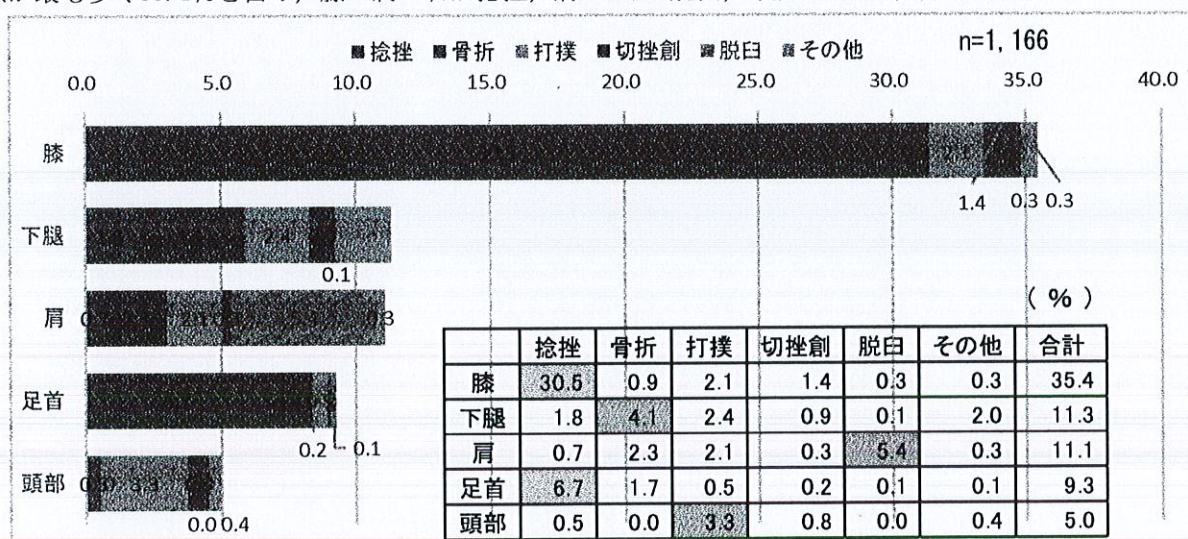

図13-2. スキーにおける「自己転倒」時の傷害部位と種類(重複回答)



## 2) スノーボードの傷害部位と種類

図 13-3 はスノーボード（フリースタイルスノーボード、アルペンスノーボード、その他のスノーボード）を合計した傷害部位と種類です。肩(17.7%)、手首(15.4%)、頭部(9.6%)、肘(7.0%)、膝(6.8%)の順に多く受傷しています。この上位 5 部位で全傷害の 56.5%を占めました。肩と上肢の合計は 50.6%に達し、スキーマの下肢の合計(49.1%)と比べて対照的で、スノーボードでは上肢のケガが多いことがわかります。

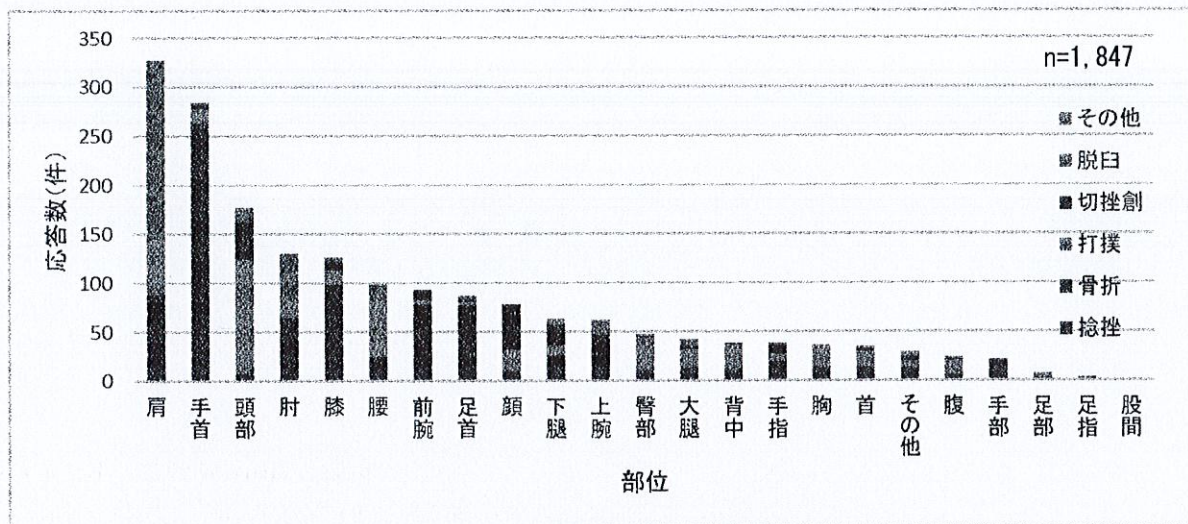

図 13-3. スノーボードの傷害部位と種類(重複回答)

図13-4 はスノーボードにおける「自分で転倒」の場合の傷害部位と種類について、上位5部位を示しました。肩と手首の割合が多く、肩の57.8%が脱臼、手首の69.4%が骨折でした。手首と前腕の骨折を合わせると全傷害の38.0%を占めました。頭部のケガの88%が骨折・打撲・切挫創であることから、ヘルメット着用の重要性を示しています。

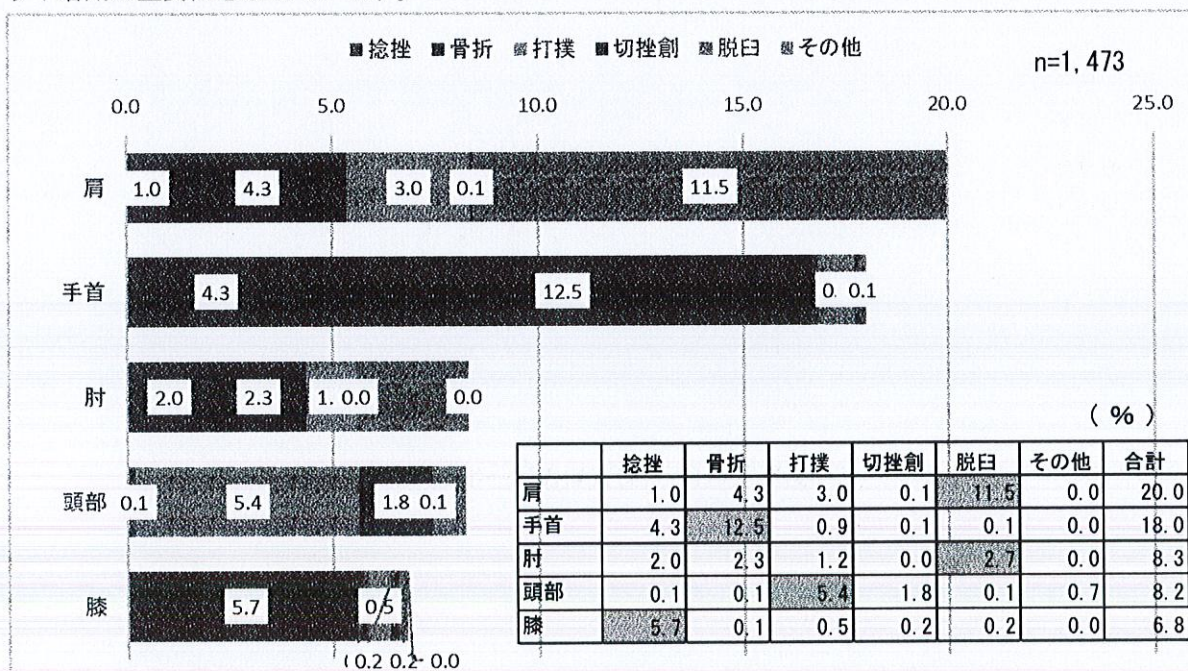

図13-4. スノーボードにおける「自己転倒」の傷害部位と種類(重複回答)



### 3) ソリの傷害

ソリの受傷は10件で、傷害の程度は1件が重傷、5件が中等傷でした。表8にその受傷概況を示しました。

表 8. ソリの傷害の概況

| NO | 性別 | 年齢 | 用具     | 受傷場所        | 受傷原因      | 部位 | 種類  | 傷害程度        |
|----|----|----|--------|-------------|-----------|----|-----|-------------|
| 1  | 男  | 45 | その他のソリ | 緩斜面(～10°)   | その他       | 顔  | 切挫創 | 軽傷(さほど必要なし) |
| 2  | 男  | 7  | その他    | 緩斜面(～10°)   | その他       | 顔  | 切挫創 | 軽傷(さほど必要なし) |
| 3  | 男  |    |        |             | 原因不明      |    |     |             |
| 4  | 女  | 24 | 腰掛ソリ   | 緩斜面(～10°)   | バランスを崩し転倒 | 顔  | 骨折  | 重傷(緊急に必要)   |
| 5  | 女  | 20 | 腰掛ソリ   | 中斜面(10～20°) | バランスを崩し転倒 | 顔  | 骨折  | 中等傷(必要あり)   |
| 6  | 男  | 34 | 腰掛ソリ   |             | バランスを崩し転倒 | 顔  | 切挫創 | 中等傷(必要あり)   |
| 7  | 男  | 33 | 腰掛ソリ   | 緩斜面(～10°)   | バランスを崩し転倒 | 下腿 | 切挫創 | 中等傷(必要あり)   |
| 8  | 女  | 73 | その他    |             | バランスを崩し転倒 | 顔  | 打撲  | 中等傷(必要あり)   |
| 9  | 女  | 55 | その他    | スキー場エリア外    | バランスを崩し転倒 | 前腕 | 骨折  | 中等傷(必要あり)   |
| 10 | 男  | 62 |        | その他         | その他       | 大腿 | その他 |             |

### 17. 傷害程度

図14 は傷害の程度を示したものです。重傷の割合はスキーとスノーボードほぼ同様で、中等傷ではスノーボードがスキーに比べては11.7ポイント大きかった。合計で、中～重傷を合わせると72.7%を占め、スノースポーツにおける傷害の程度が決して軽くないことがわかります。シーズン中の死亡事故については、資料1～3 をご覧ください。

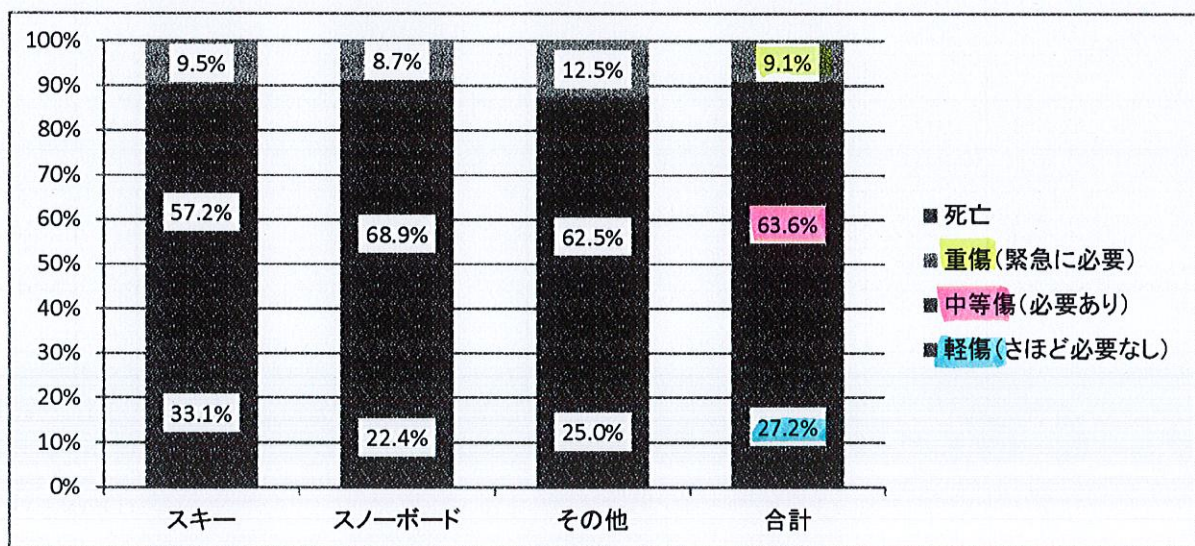

図 14. 傷害程度



## 18. 頭を強く打った疑い

図15 は「頭を強く打った疑い」の割合です。スキーもスノーボードも11～12%台の高率で頭部を強打していることから、ヘルメットの着用が勧められます。また、頭部強打の際に頸椎損傷も同時に起こる可能性が高いので受傷後注意が必要です。

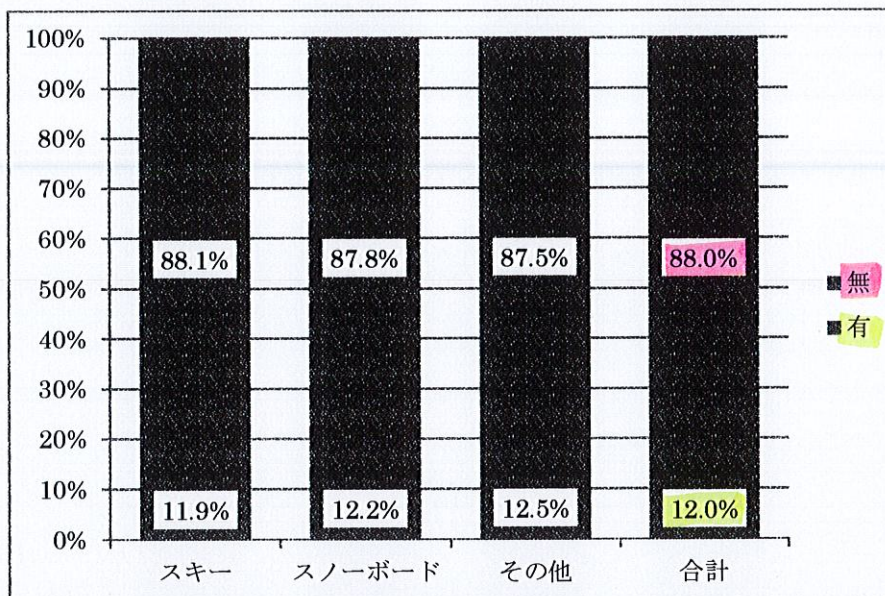

図 15. 頭を強く打った疑い

## 19. ヘルメットの着用状況

図16-1 は受傷時のヘルメット着用の有無です。スキーでは、昨シーズンの43.2%～48.2%と5.0ポイント増加、スノーボードでは22.9%から24.4%と1.5ポイント増加しました。欧米のヘルメット着用率の約8割には到底及びませんが、スキーヤーのヘルメット着用率5割が目前となってきました。さらなる啓蒙活動が望まれます。

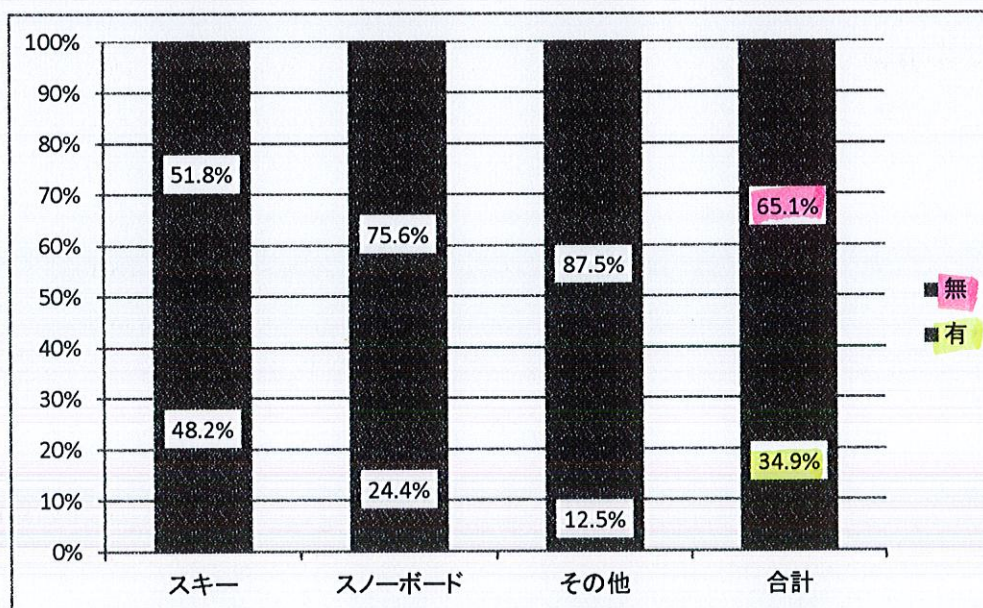

図 16-1. ヘルメット着用の有無



図 16-2 に、過去 10 シーズンのヘルメット着用率の推移について、スキーとスノーボード別に示しました。スキー・スノーボードともに増加傾向が続いていますが、スキーでやっと 5 割台が目前となってきました。さらなる啓蒙活動が必要です。

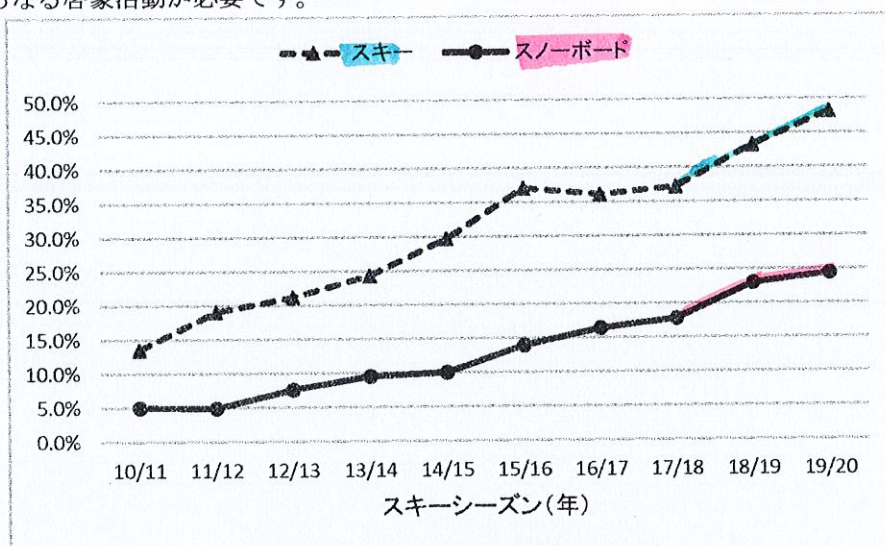

図 16-2. ヘルメット着用率の推移

## 20. 保険の加入状況

### 1) 傷害保険の加入状況

図17-1 は受傷者の傷害保険の加入状況を示し、スキーの受傷者の方がスノーボードの受傷者よりも 12.5ポイント加入率が高率でした。加入しているかどうか分からない受傷者が、スキーやスノーボードで39.0%~42.8%存在することは驚きです。さらなる保険加入への啓蒙活動が必要です。

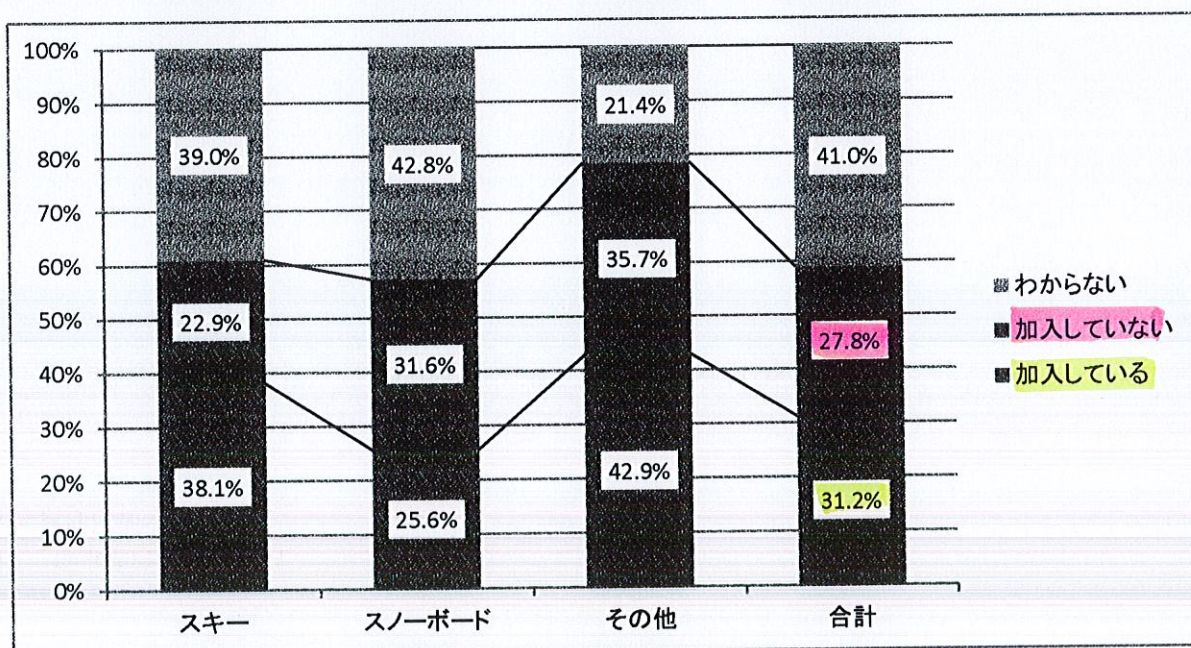

図17-1. 傷害保険の加入状況



## 2) 賠償責任保険の加入状況

図17-2 は受傷者の賠償責任保険の加入状況です。傷害保険と同様にスキーの受傷者の方がスノーボードの受傷者よりも10.4ポイント高率でした。加入しているかどうかがわからない受傷者が、スキー・スノーボードも約5割以上もいました。

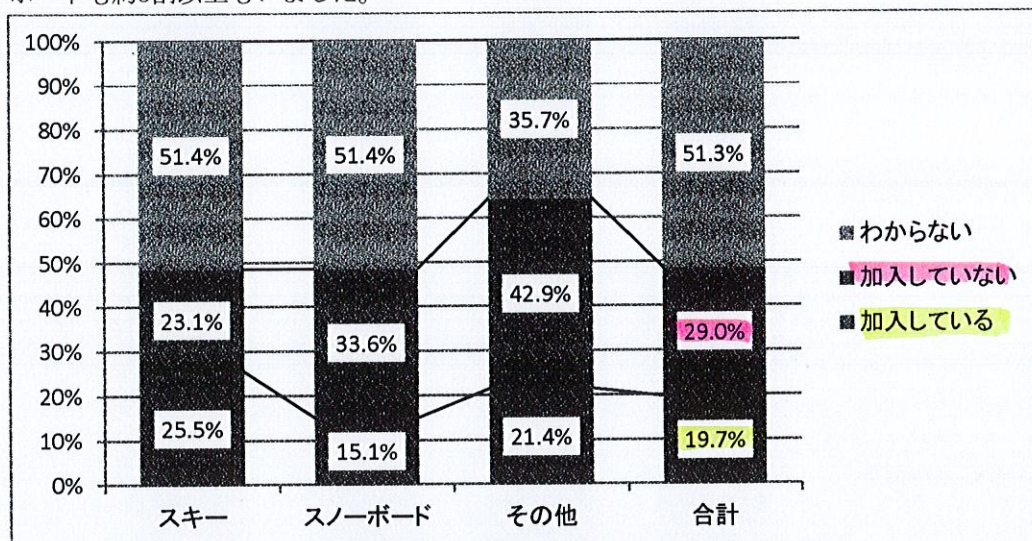

図 17-2. 賠償保険の加入状況

## 21. 受傷時の行動

図18-1 は受傷時の行動について示したものです。スキー、スノーボードとも「プライベート」での受傷が最も多く、83.7～96.8%を占めました。スキーにおいて「講習中」の受傷の割合が比較的高いのは、スノーボードよりスキースクール等での講習を受講する機会が多いことと関連があると思われます。

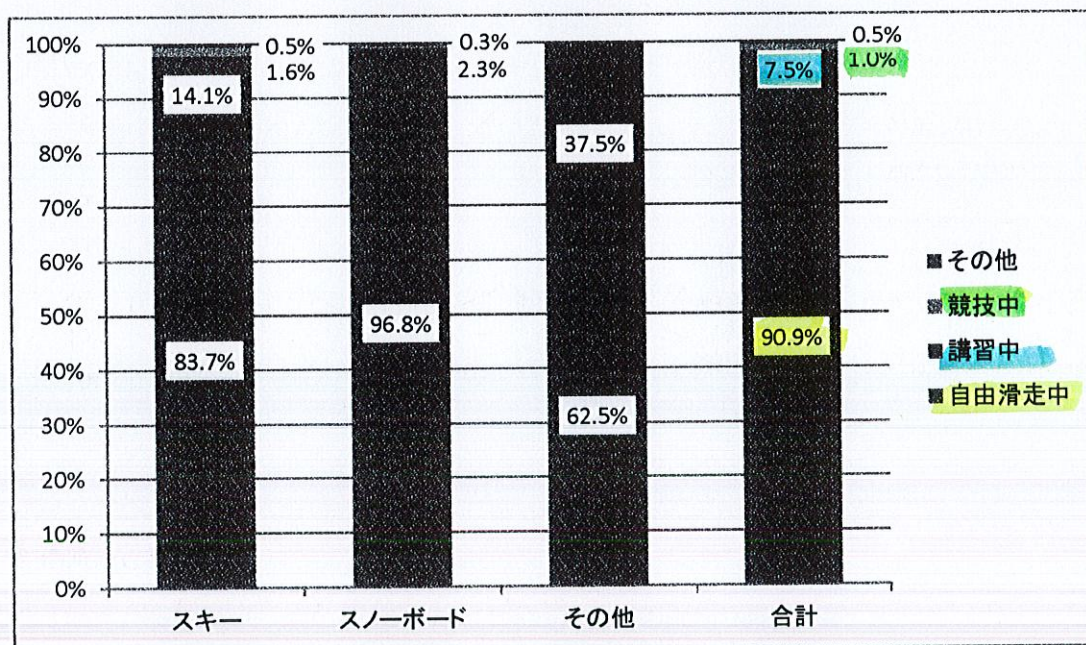

図 18-1. 受傷時の行動



図18-2 は受傷時の行動のうち「講習中」の内訳です。スキーヤー163人、スノーボーダー33人が受傷していました。「授業・講習中」に「生徒」が受傷したと回答があったのは人（スキー35人、スノーボードが6人）でした。「授業・講習中」に「指導者」が受傷したと回答があったのは4人（スキー3人、スノーボード1人）でした。

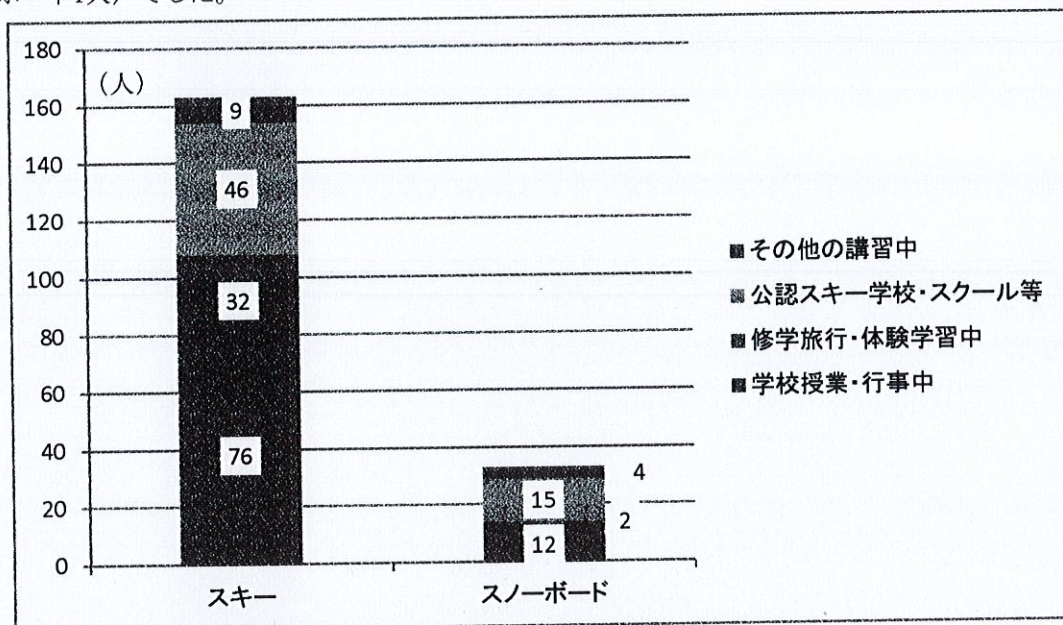

図 18-2. 受傷時の行動「講習中」の内訳

## 22. 受傷時のスピード

図19 は受傷時の「自覚的」スピードを示したものです。スキー、スノーボードともに約78～83%が「ふつう」以下のスピードで受傷しています。「自己転倒」による受傷はスキーで77.7%，スノーボードで83.4%に達することから、「ふつう」のスピードと感じていても自分で制御できないほどのスピードが出ていることがわかります。「速度」を自覚し自己制御することが傷害予防の重要なカギとなります。

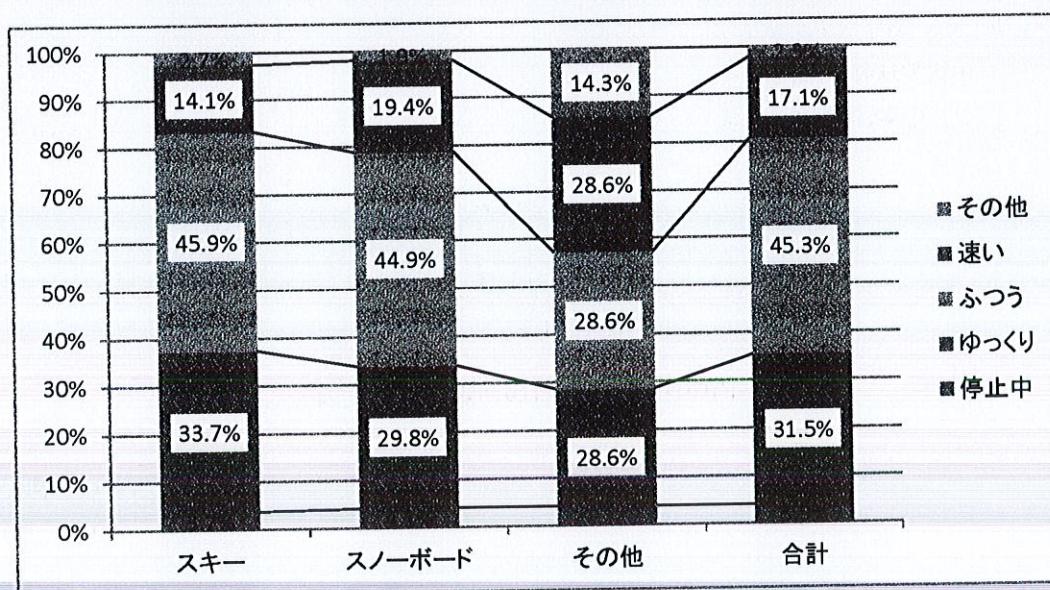

図 19. 受傷時のスピード



### 23. 雪面状況

図20 は受傷時の雪面状況です。スキー、スノーボードともに受傷時の雪面は「スムーズ」の割合が最も高く、約79～85%を占めていました。

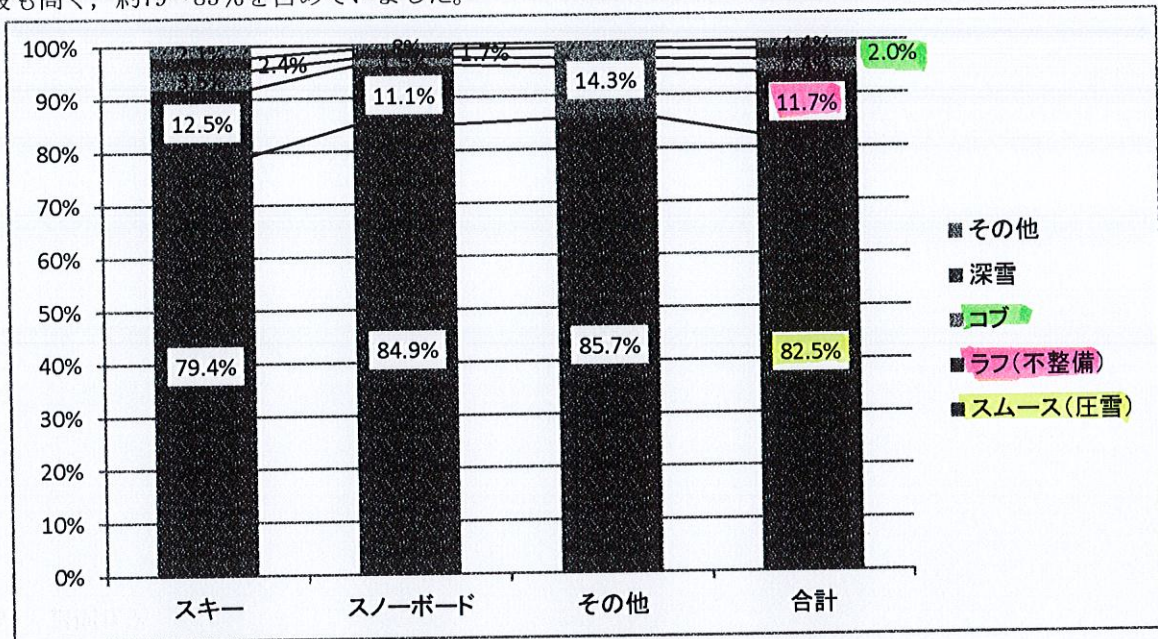

図 20. 雪面状況

### 24. 雪質

図21 は受傷時の雪質です。スキー、スノーボード、その他の合計で約53.1%が乾雪でした。

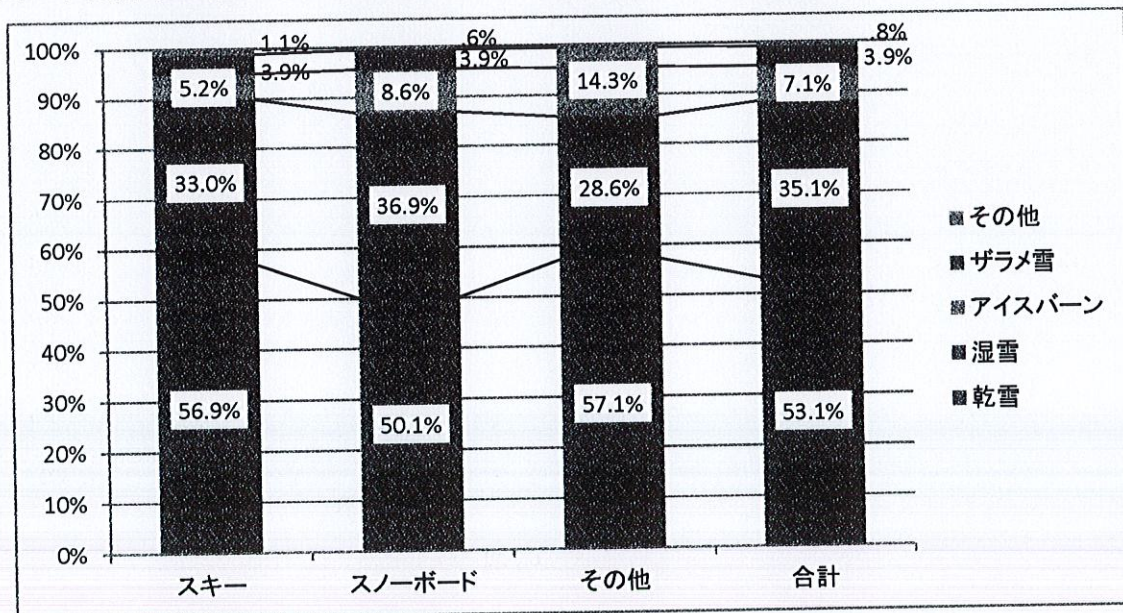

図 21. 雪質



資料 1 2019/2020 シーズン スキー場内および管理区域外での死亡事故一覧表 (2020 年 3 月 31 日現在)

| 1. スキー場内 |                                    |                                                                                             |             |                                                                                                                                                                                                                                                                                                                                                                                                                                   |                                                                             |
|----------|------------------------------------|---------------------------------------------------------------------------------------------|-------------|-----------------------------------------------------------------------------------------------------------------------------------------------------------------------------------------------------------------------------------------------------------------------------------------------------------------------------------------------------------------------------------------------------------------------------------|-----------------------------------------------------------------------------|
| No.      | 日時/天候                              | スキー場名<br>発生場所                                                                               | 死<br>傷<br>者 | 状況                                                                                                                                                                                                                                                                                                                                                                                                                                | 原因/対策                                                                       |
| 1        | 2020. 02. 08<br>(土) 15:00 頃        | 長野県山ノ内町<br>志賀高原焼額山<br>スキー場ビギナ<br>ーコース脇から<br>5.9m 離れた地点<br>コース幅 9.7m 斜<br>度 15 度             | S1          | 友人ら 4 人と、2 月 5 日から滞在していたオーストラリア籍スキーヤー (61 才・男性) が、山頂から下ったビギナーコース付近の、コースから外れた樹木付近で倒れているのを友人が発見した。パトリック隊到着時には心肺停止状態だったため、心臓マッサージをおこない病院へ搬送されたが死亡が確認された。警察で死因を調べたが不明とのこと。                                                                                                                                                                                                                                                            | 原因：不明<br><br>①事業者からの報告<br>②新聞報道<br>2/9 信越放送 web<br>2/11 信濃毎日新聞              |
| 2        | 2020. 02. 09<br>(日) 10:00 頃        | 長野県信濃町<br>タングラムスキー<br>場<br>あんずダウンス<br>ル<br>(ツリーランコ<br>ース)<br>全長:500m 斜<br>度:23 度新雪:60<br>cm | B1          | 友人ら 3 人で来場していた当該ボーダー (39 才・男性) は、友人 1 人を伴いツリーランコースを滑走し、コース序盤の急斜面に入った場所で転倒し、逆立ちした状態で腰まで雪に埋もれた。ほぼ同時に友人も転倒し雪に埋もれた。め、すぐに救出できなかった。友人は別コースを滑走していた別の友人に電話をかけてパトリック隊へ救助要請と自身で 119 番通報した。パトリック到着までの間、通りかかったオーストラリア籍の医師らが救助し心肺蘇生をおこなったが、救急搬送先の病院で死亡が確認された。死因は窒息。現場は非圧雪のスキー場内の森の中を滑る「ツリーランコース」と呼ばれる上級者向けで、一帯は前日の降雪で新たに 60 cm の積雪があった。コース入口にツリーランコース滑走の案内および緊急連絡先明記の看板を設置。毎朝パトリック隊のコースチェック後にオープン。ゲレンデマップ等には、ツリーランコース滑走に潜むリスク文を記載している。(ツリーホール) | ①事業者からの報告<br>②新聞報道<br>2/9 信越放送 web<br>2/11・13 信濃毎日新聞                        |
| 3        | 2020. 02. 24<br>(月祝) 10:30 頃<br>曇り | 長野県松本市<br>野表峠スキー場<br>チャンピオン 2<br>コース外コース<br>幅 20m 弱、斜度<br>10°                               | S1          | 2 月 24 日 10 時 30 分頃、男性スキーインストラクターがコースアウトした生徒を助け起こす際、コース脇の林にスキー板を発見しパトリック隊に連絡した。到着したパトリック隊がスキー板付近に血痕を見つけ、さらに雪の中からスキーウェアらしきものを確認し警察・消防に通報した。12 時頃消防隊が到着、雪に埋もれた当該スキーヤーを確認し、13 時頃警察が到着し現場検証をおこなったのち、スキーヤーをスキーセンターまで搬送し死亡が確認された。当該スキーヤーは 2 月 21 日に発券したリフト券を所持しており、愛知県在住の常連のスキーヤー (49 才・男性) と確認された。死因は外傷性くも膜下出血で立木に衝突したと見られる。現場はコースから約 10m 離れた斜面でコースからは死角で、23・23 日に積雪がありに雪に埋もれた模様。                                                      | ①事業者からの報告<br>あり②新聞報道<br>2/25 中日新聞 web<br>NBSweb<br>SBCweb<br>2/25・26 信濃毎日新聞 |



|   |                          |                                                         |    |                                                                                                                                                                                                                                                                                                                                                   |                                             |                                                              |
|---|--------------------------|---------------------------------------------------------|----|---------------------------------------------------------------------------------------------------------------------------------------------------------------------------------------------------------------------------------------------------------------------------------------------------------------------------------------------------|---------------------------------------------|--------------------------------------------------------------|
| 4 | 2020.03.22<br>(日)12:55 頃 | 秋田県北秋田市<br>森吉山阿仁スキ<br>一場                                | S1 | <p>秋田市山王のスキヤー(46才男性)は午前中から知人と2人でスキーをしていて、自分に続いて滑っているはずの男性の姿が見えないことから知人がパトリール隊に連絡。コース脇斜面のスキ立木(直径30~50cm、高さ10m)の近くで横向に倒れている男性を発見した。立木に衝突したと見られる。北秋田市内の病院に搬送されたが約3時間後に外傷性ショックで死亡した。</p>                                                                                                                                                              | コース脇の立木に衝突                                  | ①新聞報道<br>3/22 秋田魁新聞 web                                      |
| 5 | 2020.03.30(月)<br>10:05 頃 | 新潟県妙高市<br>ロッセアアイリ<br>ゾート<br>フリーライディ<br>ングゾーン(膳<br>棚ボウル) | B1 | <p>来場していたボーター(45才男性)が沢に転落した。その際スキー場で偶然出会った友人に携帯電話で救助を要請し、友人がスキー場に救助を要請した。先発したパトリール隊員が規制ロープと規制ネットを潜り、滝へ続くシュプールを発見した。落水で開いた口から滝壺(雪面から滝底まで約7.5m)に入り当該ボーターに接触するが意識が無かった。救出後の搬送中にAEDを使用したのが心停止のため使用できず、胸骨圧迫と人工呼吸を続け、救急隊へ引き継いだ。搬送先の病院で死亡が確認された。死因は緊急性気胸。コース名にもあるボウル地形の谷底まで滑り降りて沢沿いを歩いた模様。左側に少し登って迂回すればよかったが、再びボードで右側斜面を滑走し規制ロープと規制ネットを潜って滝壺に落下した模様。</p> | <p>対策：来場者に規制ロープ・ネット、看板等の規制物を尊重するよう喚起する。</p> | <p>①事業者からの報告あり<br/>②新聞報道<br/>3/30NHK 新潟WEB<br/>3/31 新潟日報</p> |

| 2. 管理区域外（参考） |                                |                                                     |       |                                                                                                                                                                                                                                                                                                                                                                                                |           |                                                                |
|--------------|--------------------------------|-----------------------------------------------------|-------|------------------------------------------------------------------------------------------------------------------------------------------------------------------------------------------------------------------------------------------------------------------------------------------------------------------------------------------------------------------------------------------------|-----------|----------------------------------------------------------------|
| No.          | 日時／天候                          | スキー場名<br>発生場所                                       | 死 傷 者 | 状 況                                                                                                                                                                                                                                                                                                                                                                                            | 原因／対策     | 記 事                                                            |
| 1            | 2020.01.30<br>(木)15:30 頃<br>強風 | 北海道占冠村<br>トマムスキー場管理区<br>域外                          | S1    | 山頂付近の管理区域外で仏国人男女8人が雪崩に巻き込まれた。7人は自力で下山できたが、現場にとどまっている1人が意識不明の重体とみられ（携帯が繋がっていたためGPSで現場が確認できた）、31日夜明けを待って北海道警察山岳救助隊などが捜索を開始し発見されたが、死亡が確認された。                                                                                                                                                                                                                                                      | 雪崩に巻き込まれた | ①新聞報道<br>2/1 北海道新聞 web                                         |
| 2            | 2020.02.01<br>(土)11:40         | 北海道中頓別町<br>ピンネシリ岳 (703m)                            | S1    | 山スキーをしていた英国人(34才)が雪崩に巻き込まれ、仲間に救助されたが搬送先の病院で死亡が確認された。                                                                                                                                                                                                                                                                                                                                           | 雪崩に巻き込まれた | ①新聞報道<br>2/2 北海道新聞 web                                         |
| 3            | 2020.02.01<br>(土)12:30 頃       | 長野県松本市北アルプス<br>乗鞍岳 (3,026m)<br>北東斜面標高 2,500m 付<br>近 | B1    | 乗鞍岳北東斜面で、仲間2人とバックカントリイをしていたボーダー(47才・男性)が雪崩に巻き込まれたと、同行者から119番通報があった。ボーダーは15時過ぎに山梨県消防防災ヘリに救助され、松本市内の病院へ搬送されたが死亡が確認された。警察によるとボーダーら3人は、Mt.乗鞍スノーリゾートから、標高2,500m付近まで登り、バックカントリイをしており、雪崩は最長200～300mほどの規模で、斜面で転倒して歩いていったボーダーを巻き込んだ。同行者2人は離れたところに居り無事だった。当日は気温が上がり乗鞍岳中腹では0℃でこの時期としては暖かかった。地元のツアア会社によると、現場はゲレンデ最上部から2時間半ほどかかり、斜面40度で雪崩が起きやすく、ツアアならまず滑らない場所とこのこと。現場一帯は1週間前の雨などでアイスバーンができており、その上に雪が積もっていた。 | 雪崩に巻き込まれた | ①新聞報道<br>2/1 中日新聞 web<br>日本経済新聞 web<br>長野放送、信越放送<br>2/2 信濃毎日新聞 |
| 4            | 2020.03.20(金)<br>17:00 頃       | 長野県小谷村<br>桐池高原スキー場管理<br>区域外                         | S1    | 桐池高原スキー場川入山した東京都在住のスキーヤー（40才男性）と、外国籍とみられるスキーヤー（40才男性）がバックカントリイスキーをしていたところ、標高1,300m付近の沢で道に迷い、行動不能になったと、東京都在住の男性から救助要請があった。翌日、県警ヘリで救助されたが、外国籍とみられる男性は21日朝の時点で意識がなく搬送先の病院で死亡が確認された。救助要請した男性は軽傷とみられる。県警は死亡した男性の身元や死因を調べている。                                                                                                                                                                        | 遭難        | ①新聞報道<br>3/21NBS 長野 web<br>3/22 信濃毎日新聞                         |

資料 2 スノースポーツ死亡者数の 17 年間の推移

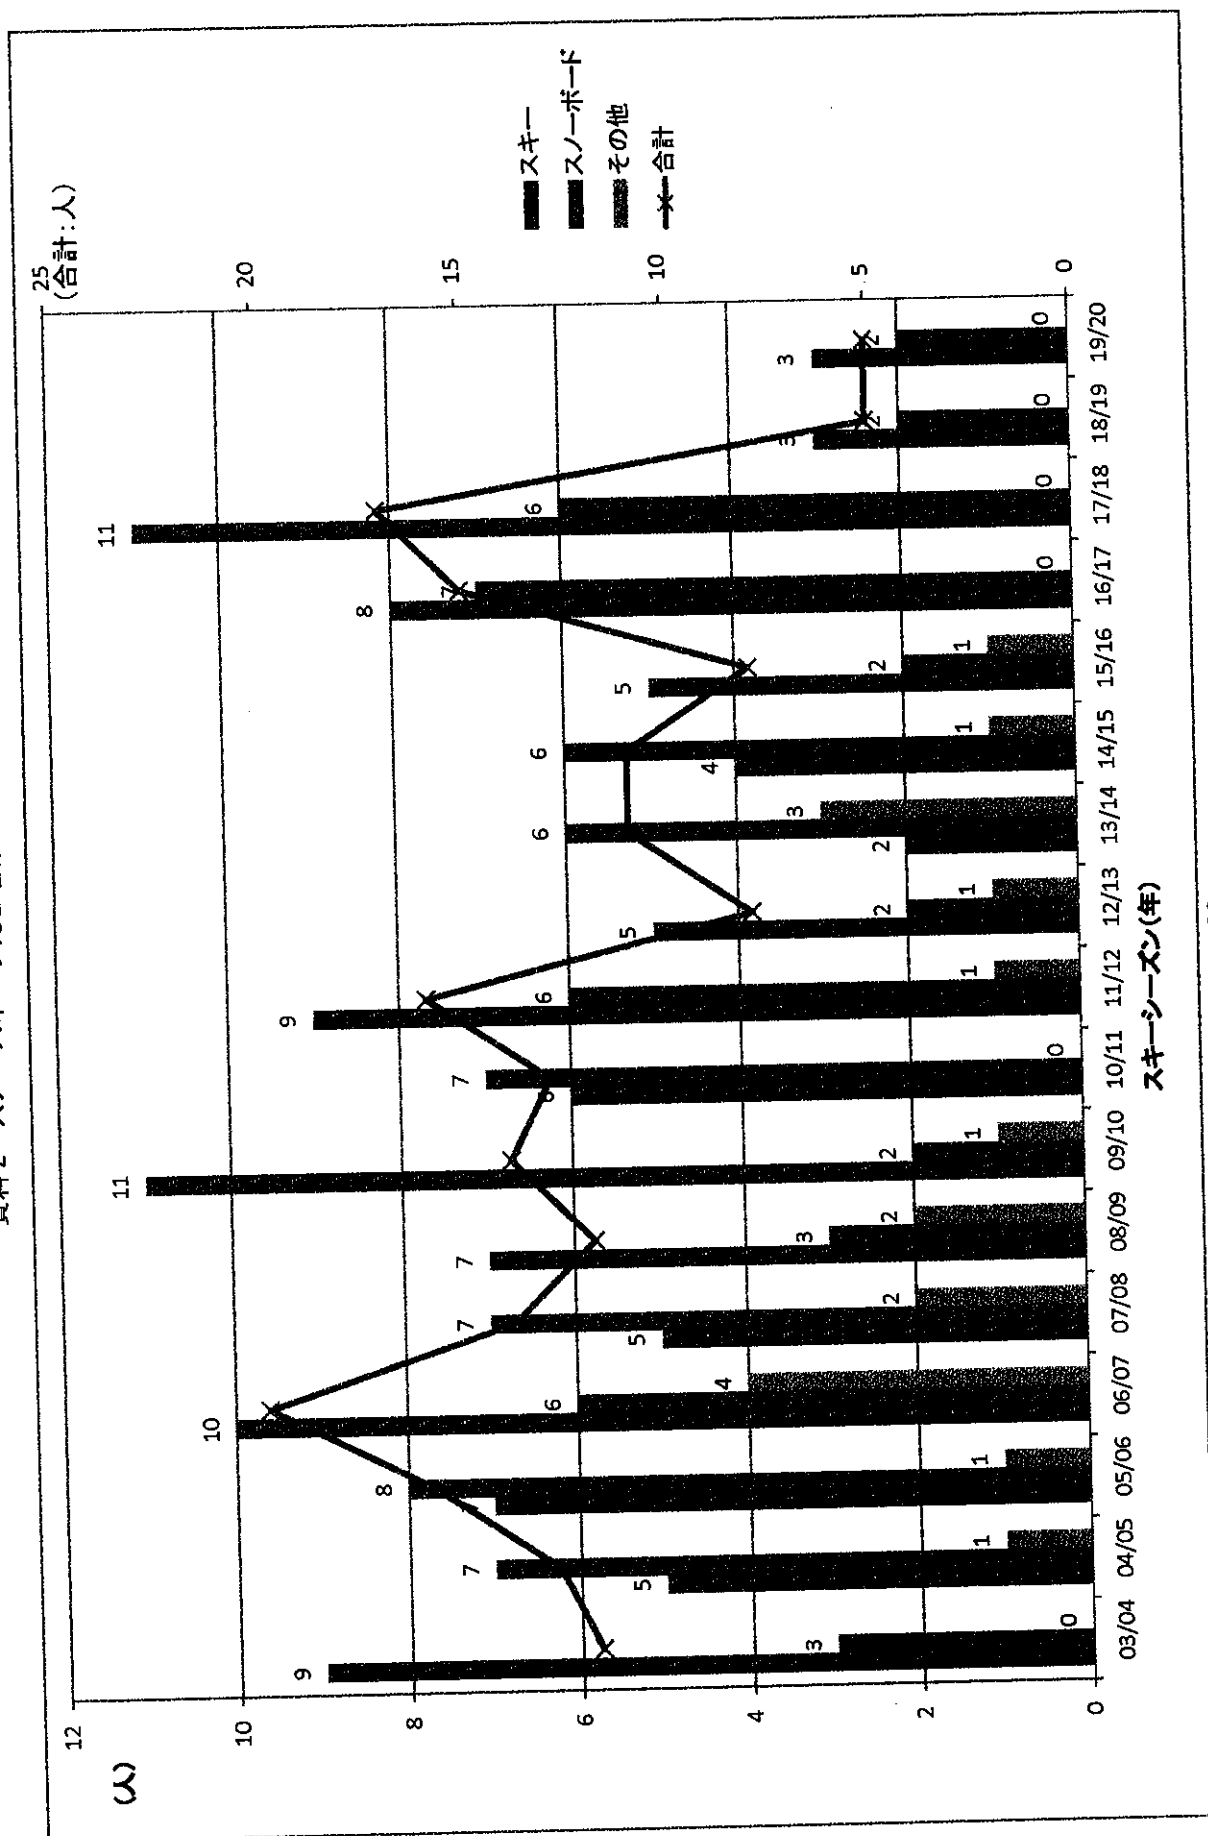



スキー場名

2020年2月スキー場傷害調査用紙

No S・B-

|            |                                                                                                                                                   |       |                                                                                                                                                                                                                             |                             |                                                                                                                                                                    |              |                                                                                                                                                                      |  |
|------------|---------------------------------------------------------------------------------------------------------------------------------------------------|-------|-----------------------------------------------------------------------------------------------------------------------------------------------------------------------------------------------------------------------------|-----------------------------|--------------------------------------------------------------------------------------------------------------------------------------------------------------------|--------------|----------------------------------------------------------------------------------------------------------------------------------------------------------------------|--|
| ● 負傷日時     | 2020年 月 日 ( )                                                                                                                                     |       | ● 天候                                                                                                                                                                                                                        | 1 晴 2 曇<br>3 雪 4 雨<br>5 その他 |                                                                                                                                                                    | ● 用具         | 1 アルペンスキー 2 スキーボード (100cm未満)<br>3 テレマークスキー<br>4 クロスカントリースキー<br>5 その他スキー ( )                                                                                          |  |
|            | 1 午前 2 午後 時 分                                                                                                                                     |       |                                                                                                                                                                                                                             |                             |                                                                                                                                                                    |              | 6 フリースタイルボード<br>7 アルペンスノーボード 8 その他のスノーボード<br>9 子供用ソリ 10 腰掛けソリ 11 立ち乗りソリ<br>12 その他のソリ ( )<br>13 具体的に ( )                                                              |  |
| ● 負傷者      | ふりがな<br>氏名                                                                                                                                        |       | ● 住所                                                                                                                                                                                                                        | (〒 ) 都道府県                   |                                                                                                                                                                    | ● 受傷場所       | 1 緩斜面 ( ~10° ) 4 ワンメイク 7 リフト乗り場<br>2 中斜面 (10~20° ) 5 ハーフパイプ 8 リフト乗車中<br>3 急斜面 (20° 以上) 6 ウエーブ 9 リフト降り場<br>10 その他 ( ) 11 スキー場エリア外                                     |  |
|            | 1 男 2 女 年齢 ( ) 歳<br>外国人の場合 国名: ( )                                                                                                                |       |                                                                                                                                                                                                                             | TEL                         |                                                                                                                                                                    |              |                                                                                                                                                                      |  |
| ● 受傷原因     | 自分で転倒                                                                                                                                             |       | 人と衝突                                                                                                                                                                                                                        |                             | 人以外と衝突                                                                                                                                                             |              | その他                                                                                                                                                                  |  |
|            | 1 バランスを崩して 2 転倒・滑落<br>3 ジャンプの失敗 4 トリックの失敗<br>5 逆エッジ転倒 6 その他 ( )                                                                                   |       | 7 スキーヤーと衝突<br>8 ボーダーと衝突<br>9 その他の人 ( )                                                                                                                                                                                      |                             | 10 立木 11 岩・石 12 ネット<br>13 リフト支柱 14 看板・標識<br>15 その他 ( )                                                                                                             |              | 16 具体的に記入<br>( )<br>17 原因不明                                                                                                                                          |  |
| ● 傷害の部位と種類 | 障害の部位と種類を下の表より選び番号で記入して下さい。<br>※複数のケガの場合は、障害の重い順に記入して下さい。<br>傷害重傷順に記入 1番 2番 3番 4番<br>(部位番号は1部1ヶ所)<br>障害の部位<br>左・右・該当無 左右無 左右無 左右無 左右無<br>傷害の種類    |       | ● 医療機関での治療が<br>1 軽 傷⇒さほど必要なし<br>2 中等傷⇒必要あり<br>3 重 傷⇒緊急に必要<br>4 死 亡<br>● 頭を強く打った疑い<br>1 有 2 無<br>● ヘルメットの着用<br>1 有 2 無<br>● 自分のケガのための傷害保険に<br>1 加入している 2 加入していない 3 わからない<br>● 相手のケガのための賠償責任保険に<br>1 加入している 2 加入していない 3 わからない |                             | ● 行 動<br><プライベート> 1 自由滑走中<br><講習中> 2 学校授業・行事中 3 修学旅行・体験学習中<br>4 公認スキー学校・スクール等 5 その他の講習中<br>(ケガをしたのは、1 生徒 2 指導者 3 アシスタント)<br><競技中> 6 ボール練習中 7 大会・競技出場中<br><その他> ( ) |              | ● スピード<br>1 停止中 2 ゆっくり 3 ふつう 4 速い 5 その他 ( )<br>● 雪質<br>1 スムース(圧雪) 2 ラフ(不整雪) 3 コブ 4 深雪 5 その他 ( )<br>● 雪質<br>1 乾 雪 2 湿 雪 3 アイスバーン 4 ザラメ雪 5 その他 ( )                     |  |
|            | 1 頭 2 顔 3 首 4 胸<br>5 背中 6 腹 7 腰<br>8 臀部 9 股間 10 肩<br>11 上腕 12 肘 13 前腕<br>14 手首 15 手肘 16 手指<br>17 太腿 18 膝 19 下腕<br>20 足首 21 足部 22 足指<br>23 その他 ( ) |       | ● ケガの部位に×印をつけて下さい<br>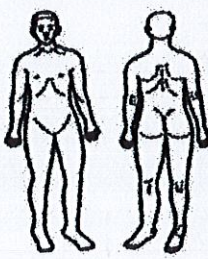                                                                                                                    |                             | ● 備考<br>1 確認している 2 不明 3 男 4 女<br>氏名<br>住所<br>TEL                                                                                                                   |              | ● 搬送方法<br>①事故現場→救護室・駐車場 1 アキヤ 2 スノーボード 3 スノーモービル 4 自分で 5 その他<br>②救急処置後の行動 1 病院へ(病院名: ) 2 その他 ( )<br>③スキー場→病院: 1 救急車 2 スキー場関係の車 3 負傷者関係の車 4 ヘリコプター 5 その他 ④飲酒: 1 有 2 無 |  |
| 搬送者氏名      |                                                                                                                                                   | 処置者氏名 |                                                                                                                                                                                                                             | 記録者氏名                       |                                                                                                                                                                    | 記録 2020年 月 日 |                                                                                                                                                                      |  |

※ 該当する番号に○印、✓印または文字・数字を記入してください。

※ 右上のNo S・Bは、スキーヤー (S)・スノーボーダー (B)に分けて各々1から番号を付けてください。

※ この調査用紙は全国スキー安全対策協議会のスキー場傷害報告書作成以外の目的には使用いたしません。

※ 負傷者および衝突の相手の氏名・住所は複写されません。

ご協力ありがとうございました  
全国スキー安全対策協議会



**○** 後援者共  
其買主の状況を知らせる為の懸念で、暫くして家賃を下げざるもの。

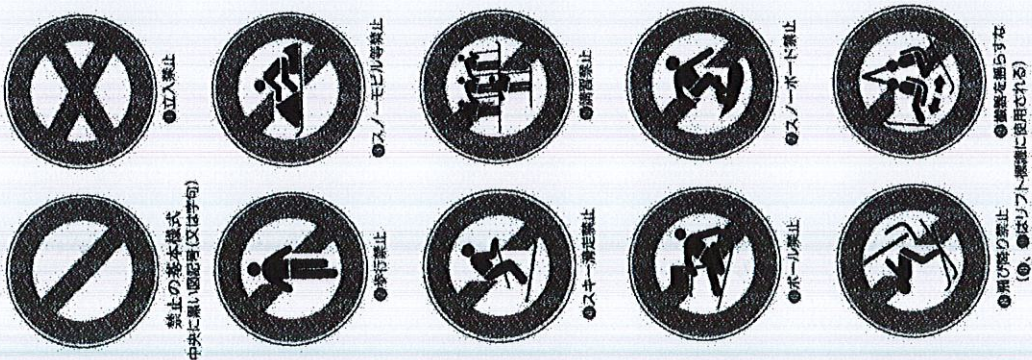

**D 注意旗** 船に標示し、接近や進入等を制止するもの。

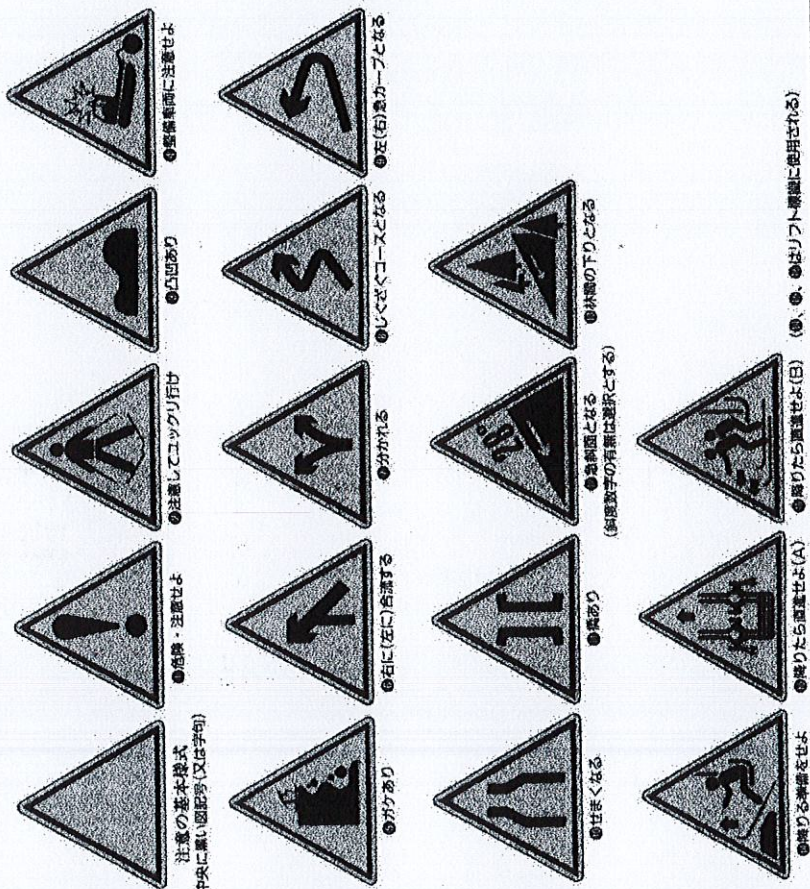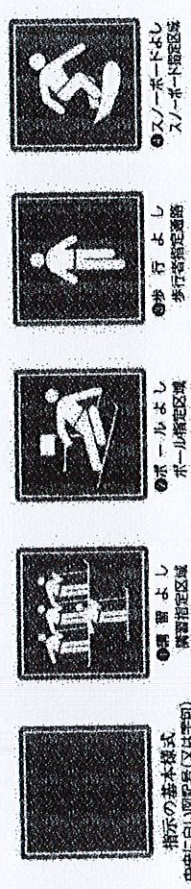

1. 理解しやすくなるために、標題に簡潔な平句を配することが許される。その際、標題の版面内に記入する方法と、標題板に記入して添える方法とがある。



2019/2020シーズン スキー場傷害報告書  
2020（令和2）年9月発行

発行所 全国スキー安全対策協議会

《事務局》

〒111-0056

東京都台東区小島2丁目18番15号

新御徒町妙見屋ビル3階

一般財団法人 日本鋼索交通協会内

TEL 03-3866-3163

FAX 03-3866-3164

<http://www.nikokyo.or.jp/safety-snow/>

e-mail [jfta@nikokyo.or.jp](mailto:jfta@nikokyo.or.jp)

（無断転載禁止）
