# Supplementary material for: Comparison and Analysis of Injuries At Ski Resorts in Chongli, China and Japan
Source: Research Square preprint supplement (doi:10.21203/rs.3.rs-1134070/v1), 2021-12-07
Supplement: Supplementary file 2 [file 34b2d574e4ce5ae0f5c0ed52.xlsx]

## Sheet: 富龙2017-2018雪季
编号	日期	月份编号	性别	年龄	受伤原因	受伤原因（1-摔伤；2-撞伤；3-划伤；4-扭伤；5-挫伤；6-碰伤；7-擦伤；8-其他）	受伤部位	受伤部位（1-头部（脑部：1.1）；2-膝关节；3-手腕手指；4-腰臀；5-下肢；6-胸肋腹；7-上肢；8-肩背；9-面颈部；10-脚踝）	初步诊断	损伤类型（1-擦伤和外伤；2-关节损伤及韧带受损；3-肌肉拉伤及软组织损伤；4-骨折，骨裂；5-脑震荡及内脏；6-其他）	受伤程度
1	2017.11.17	1	女	30	摔伤	1	右膝部	2	右膝外伤	1	轻度
2	2017.11.19	1	女	38	摔伤	1	右膝部	2	右膝外伤	1	轻度
3	2017.11.19	1	女	34	撞伤	2	头部	1	左侧头部	1	轻度
4	2017.11.19	1	女	23	摔伤	1	头部	1	左侧头部	1	轻度
5	2017.11.22	1	男	26	划伤	3	手指	3	外伤	1	轻度
6	2017.11.22	1	男	27	摔伤	1	右手臂	7	右臂骨折	4	中度
7	2017.11.23	1	女	22	摔伤	1	头部	1	脑震荡	5	轻度
8	2017.11.25	1	男	37	摔伤	1	头部	1	脑震荡	5	轻度
9	2017.11.25	1	男	9	摔伤	1	嘴唇	9	上唇系带	3	轻度
10	2017.11.25	1	男	36	摔伤	1	左踝	5	左踝外伤	1	轻度
11	2017.11.25	1	女	30	撞伤	2	左侧面部	9	面部擦伤	1	轻度
12	2017.11.25	1	女	29	撞伤	2	腰部	4	腰部外伤	1	轻度
13	2017.11.26	1	男	24	挫伤	5	右手腕	3	右手腕外伤	1	轻度
14	2017.11.27	1	男	13	摔伤	1	左手腕	3	左手腕外伤	1	轻度
15	2017.11.28	1	男	15	碰伤	6	右侧头	1	头部划伤	1	轻度
16	2017.11.28	1	男	33	摔伤	1	右肩疼痛	8	右肩外伤	1	轻度
17	2017.11.29	1	男	16	摔伤	1	右下肢	5	右下肢骨折	4	中度
18	2017.12.1	2	女	30	撞伤	2	右腿	5	韧带拉伤	2	轻度
19	2017.12.2	2	男	33	扭伤	4	腰部	4	腰部扭伤	3	轻度
20	2017.12.2	2	女	34	摔伤	1	右腿外侧	5	右腿拉伤	3	轻度
21	2017.12.2	2	女	30	未知	8	头部	1	晕车引起	6	轻度
22	2017.12.2	2	女	26	摔伤	1	尾椎	4	尾椎外伤	1	轻度
23	2017.12.2	2	女	29	摔伤	1	右手腕	3	右手腕骨裂	4	中度
24	2017.12.2	2	男	29	摔伤	1	右手腕	3	右腕骨折	4	中度
25	2017.12.2	2	男	25	摔伤	1	左肘	7	左肘外伤	1	轻度
26	2017.12.2	2	女	30	摔伤	1	右前臂	7	右前臂外伤	1	轻度
27	2017.12.3	2	男	34	挫伤	5	尾椎	4	尾椎外伤	1	轻度
28	2017.12.3	2	女	24	摔伤	1	右膝部	2	韧带拉伤	2	轻度
29	2017.12.4	2	男	29	摔伤	1	右肩部	8	右肩脱位	2	轻度
30	2017.12.4	2	男	30	撞伤	2	左腿	5	左股骨颈骨折	4	中度
31	2017.12.4	2	女	31	摔伤	1	左腕部	3	左腕骨折	4	中度
32	2017.12.8	2	女	37	摔伤	1	右中指	3	右中指骨折	4	中度
33	2017.12.8	2	男	35	挫伤	5	右手中指	3	右中指骨折	4	中度
34	2017.12.9	2	男	24	挫伤	5	右手腕	3	右手外伤	1	轻度
35	2017.12.9	2	男	13	摔伤	1	左手腕	3	左手腕外伤	1	轻度
36	2017.12.9	2	男	27	挫伤	5	右手中指	3	右中指骨折	4	中度
37	2017.12.9	2	男	11	摔伤	1	右前臂	7	右前臂骨折	4	中度
38	2017.12.9	2	男	24	挫伤	5	右手指	3	右手指外伤	1	轻度
39	2017.12.9	2	男	26	挫伤	5	右手腕	3	右手腕骨折	4	中度
40	2017.12.9	2	男	38	摔伤	1	右锁骨	6	右锁骨骨折	4	中度
41	2017.12.9	2	男	32	摔伤	1	尾骨	4	尾骨挫伤	4	轻度
42	2017.12.13	2	男	19	摔伤	1	右膝部	2	韧带拉伤	2	轻度
43	2017.12.13	2	男	23	摔伤	1	右臂脸部	9	面部擦伤	1	轻度
44	2017.12.13	2	男	32	摔伤	1	右腿	5	右腿外伤	1	轻度
45	2017.12.13	2	男	29	摔伤	1	头部	1	头部外伤	1	轻度
46	2017.12.14	2	男	14	摔伤	1	右肩	8	右肩外伤	1	轻度
47	2017.12.16	2	女	30	撞伤	2	左膝	2	左膝外伤	1	轻度
48	2017.12.16	2	女	36	摔伤	1	左臂	7	左臂外伤	1	轻度
49	2017.12.16	2	男	35	摔伤	1	左肩	8	左肩外伤	1	轻度
50	2017.12.16	2	男	36	摔伤	1	背部	8	背部外伤	1	轻度
51	2017.12.16	2	男	45	摔伤	1	左膝部	2	左膝外伤	1	轻度
52	2017.12.16	2	男	29	摔伤	1	右肩部	8	肩关节脱位	2	轻度
53	2017.11.16	2	女	24	摔伤	1	左肩部	8	左肩外伤	1	轻度
54	2017.12.17	2	女	31	摔伤	1	背部	8	肌肉拉伤	3	轻度
55	2017.12.17	2	女	25	摔伤	1	右肩部	8	肩关节脱位	2	轻度
56	2017.12.17	2	男	27	摔伤	1	右膝部	2	右膝外伤	1	轻度
57	2017.12.17	2	女	30	摔伤	1	脑部	1.1	轻微脑震荡	5	轻度
58	2017.12.17	2	女	28	摔伤	1	右膝部	2	韧带拉伤	2	轻度
59	2017.12.17	2	女	29	撞伤	2	脑部	1.1	轻微脑震荡	5	轻度
60	2017.12.17	2	女	13			右手腕	3	右手部骨折	4	中度
61	2017.12.17	2	女	32	撞伤	2	脑部	1.1	轻微脑震荡	5	轻度
62	2017.12.18	2	女	16	撞伤	2	脑部	1.1	轻微脑震荡	5	轻度
63	2017.12.18	2	男	20	撞伤	2	右下肢疼痛	5	右下肢外伤	1	轻度
64	2017.12.19	2	男	16	摔伤	1	右小腿部	5	右胫骨骨折	4	中度
65	2017.12.19	2	女	54	摔伤	1	左手腕部	3	手腕部外伤	1	轻度
66	2017.12.19	2	男	17	摔伤	1	脸部	9	脸部外伤	1	轻度
67	2017.12.20	2	男	25	摔伤	1	右膝部	2	韧带断裂	2	中度
68	2017.12.20	2	女	21	摔伤	1	左膝部	2	肌肉拉伤	3	轻度
69	2017.12.20	2	男	30	挫伤	5	右肩部	8	右肩部外伤	1	轻度
70	2017.12.21	2	女	21	摔伤	1	左脚踝	5	皮下血肿	3	轻度
71	2017.12.21	2	女	25	摔伤	1	左前臂	7	左前臂刺伤	1	轻度
72	2017.12.21	2	女	24	摔伤	1	左膝部	2	韧带拉伤	2	轻度
73	2017.12.22	2	男	17	摔伤	1	右肩部	8	右肩骨折	4	中度
74	2017.12.22	2	女	45	摔伤	1	左膝部	2	左膝疼痛	2	轻度
75	2017.12.23	2	女	28	摔伤	1	脑部	1.1	轻微脑震荡	5	轻度
76	2017.12.23	2	男	30	挫伤	5	右肩部	8	右肩骨折	4	中度
77	2017.12.23	2	女	30	摔伤	1	臀部	4	肌肉拉伤	3	轻度
78	2017.12.23	2	女	35	摔伤	1	右肩部	8	肌肉拉伤	3	轻度
79	2017.12.23	2	男	40	摔伤	1	左腿部	5	左腿外伤	1	轻度
80	2017.12.23	2	女	36	摔伤	1	腰部	4	肌肉拉伤	3	轻度
81	2017.12.23	2	男	37	摔伤	1	右膝部	2	韧带拉伤	2	轻度
82	2017.12.23	2	女	21	摔伤	1	右膝部	2	皮下血肿	3	轻度
83	2017.12.23	2	男	32	挫伤	5	右肩部	8	肌肉拉伤	3	轻度
84	2017.12.23	2	男	27	挫伤	5	右手腕部	3	肌肉拉伤	3	轻度
85	2017.12.24	2	男	27	摔伤	1	右踝部	10	右踝部扭伤	2	轻度
86	2017.12.24	2	女	45	挫伤	5	左肩部	8	左肩脱位	2	轻度
87	2017.12.26	2	男	29	摔伤	1	右手腕部	3	右手腕骨折	4	中度
88	2017.12.26	2	男	34	摔伤	1	右肩部	8	韧带拉伤	2	轻度
89	2017.12.26	2	女	21	摔伤	1	双膝部	2	韧带拉伤	2	轻度
90	2017.12.28	2	女	24	摔伤	1	双膝部	2	膝部外伤	1	轻度
91	2017.12.28	2	男	44	摔伤	1	头部	1	轻微脑震荡	5	轻度
92	2017.12.30	2	女	33	摔伤	1	左臂	7	肌肉拉伤	3	轻度
93	2017.12.30	2	男	5	摔伤	1	嘴唇	9	嘴唇外伤	1	轻度
94	2017.12.30	2	男	34	挫伤	5	左腕部	3	桡骨骨折	4	中度
95	2017.12.30	2	男	39	摔伤	1	右膝部	2	右膝外伤	1	轻度
96	2017.12.30	2	男	29	撞伤	2	右臂	7	尺骨线型骨折	4	中度
97	2017.12.30	2	女	27	擦伤	7	脸部	9	脸部外伤	1	轻度
98	2017.12.30	2	女	34	摔伤	1	左腕部	3	左腕骨折	4	中度
99	2017.12.30	2	男	51	摔伤	1	鼻子	9	鼻子摔伤	3	轻度
100	2017.12.30	2	男	24	挫伤	5	手腕部	3	手腕部外伤	1	轻度
101	2017.12.30	2	男	54	摔伤	1	左肩部	8	韧带拉伤	2	轻度
102	2017.12.30	2	男	26	摔伤	1	眼部	9	眼周围外伤	1	轻度
103	2017.12.30	2	女	29	摔伤	1	左腿	5	软组织损伤	3	轻度
104	2017.12.30	2	女	39	撞伤	2	左臂	7	软组织损伤	3	轻度
105	2017.12.31	2	男	28	撞伤	2	右肩疼痛	8	肩关节脱臼	2	轻度
106	2017.12.31	2	女	40	摔伤	1	左前臂	7	左臂水肿	3	轻度
107	2017.12.31	2	男	36	擦伤	7	脸部	9	脸部外伤	1	轻度
108	2018.1.01	3	男	29	摔伤	1	右臂	7	右臂外伤	1	轻度
109	2018.1.02	3	男	32	扭伤	4	右踝部	10	右踝外伤	1	轻度
110	2018.1.04	3	女	28	扭伤	4	左踝部	10	左踝外伤	1	轻度
111	2018.1.04	3	男	30	扭伤	4	左踝部	10	左踝外伤	1	轻度
112	2018.1.04	3	女	52	扭伤	4	左腿部	5	左腿骨折	4	中度
113	2018.1.01	3	男	29	摔伤	1	左侧锁骨	6	左侧锁骨骨折	4	中度
114	2018.1.04	3	男	27	摔伤	1	髋骨	4	髋骨外伤	1	轻度
115	2018.1.04	3	男	29	摔伤	1	右臂	7	右臂外伤	1	轻度
116	2018.1.05	3	男	30	摔伤	1	右腿	5	右腿外伤	1	轻度
117	2018.1.06	3	女	45	摔伤	1	左腿部	5	左腿外伤	1	轻度
118	2018.1.06	3	男		挫伤	5	左眼角	9	左眼角外伤	1	中度
119	2018.1.06	3	女	28	撞伤	2	脑部	1.1	轻微脑震荡	5	轻度
120	2018.1.06	3	男	34	摔伤	1	左侧腰背	8	腰背外伤	1	轻度
121	2018.1.06	3	男	30	撞伤	2	颈部	9	颈部外伤	1	轻度
122	2018.1.06	3	女	24	撞伤	2	头部	1	软组织挫伤	3	轻度
123	2018.1.06	3	女	31	摔伤	1	右臀	4	右臀外伤	1	轻度
124	2018.1.06	3	女	28	摔伤	1	右肩部	8	右肩外伤	1	轻度
125	2018.1.06	3	男	26	摔伤	1	右膝部	2	韧带拉伤	2	轻度
126	2018.1.07	3	男	35	摔伤	1	左膝部	2	左膝外伤	1	轻度
127	2018.1.09	3	女	16	摔伤	1	颈部	9	脑震荡	5	轻度
128	2018.1.09	3	男	16	摔伤	1	左臂	7	骨折	4	中度
129	2018.1.09	3	男	21	摔伤	1	髋关节	4	髋关节外伤	1	轻度
130	2018.1.10	3	男	51	摔伤	1	左膝部	2	骨折	4	中度
131	2018.1.10	3	男	16	摔伤	1	左腕部	3	左腕外伤	1	轻度
132	2018.1.11	3	男	24	摔伤	1	左侧骨盆	4	左侧背部外伤	1	轻度
133	2018.1.11	3	男	35	摔伤	1	锁骨	6	锁骨外伤	1	轻度
134	2018.1.11	3	男	22	摔伤	1	左眼部	9	左眼外伤	1	中度
135	2018.1.11	3	女	31	摔伤	1	背部	8	背部外伤	1	轻度
136	2018.1.11	3	男	46	摔伤	1	左侧骨盆	4	骨盆外伤	1	轻度
137	2018.1.13	3	女	25	摔伤	1	左踝部	10	韧带拉伤	2	轻度
138	2018.1.13	3	男	55	摔伤	1	脑部	1.1	轻微脑出血	5	中度
139	2018.1.13	3	男	36	摔伤	1	左侧锁骨	6	锁骨骨折	4	中度
140	2018.1.13	3	男	28	摔伤	1	头部	1	脑震荡	5	轻度
141	2018.1.13	3	男	30	撞伤	2	头部	1	脑震荡	5	轻度
142	2018.1.13	3	女	23	摔伤	1	左膝部	2	左膝外伤	1	轻度
143	2018.1.13	3	男	28	摔伤	1	头部	1	头部外伤	1	轻度
144	2018.1.13	3	男	28	摔伤	1	右肩部	8	肩胛骨骨折	4	中度
145	2018.1.14	3	女	28	摔伤	1	头部	1	头部外伤	1	轻度
146	2018.1.14	3	男	34	摔伤	1	左膝部	2	左膝外伤	1	轻度
147	2018.1.14	3	女	37	撞伤	2	右腕部	3	右腕骨折	4	中度
148	2018.1.14	3	男	28	摔伤	1	右肩部	8	右肩外伤	1	轻度
149	2018.1.14	3	男	26	摔伤	1	右肩峰	8	右肩脱臼	2	轻度
150	2018.1.15	3	男	43	摔伤	1	右胫骨	5	右胫骨骨折	4	中度
151	2018.1.16	3	男	11	摔伤	1	右腿部	5	右腿外伤	1	轻度
152	2018.1.17	3	男	39	摔伤	1	右膝部	2	肌肉拉伤	3	轻度
153	2018.1.17	3	男	38	摔伤	1	右腕部	3	右腕外伤	1	轻度
154	2018.1.18	3	男	13	挫伤	5	左腕部	3	左腕骨折	4	中度
155	2018.1.18	3	男	16	摔伤	1	左膝盖	2	左膝外伤	1	轻度
156	2018.1.18	3	男	30	挫伤	5	右腕部	3	右腕骨折	4	中度
157	2018.1.19	3	男	30	扭伤	4	右踝部	10	右踝外伤	1	轻度
158	2018.1.20	3	女	30	挫伤	5	头部	1	头部外伤	1	轻度
159	2018.1.20	3	女	36	扭伤	4	右膝部	2	右膝外伤	1	轻度
160	2018.1.20	3	男	32	挫伤	5	左腕部	3	左腕外伤	1	轻度
161	2018.1.20	3	女	8	撞伤	2	会阴部	4	会阴外伤	1	轻度
162	2018.1.20	3	男	32	挫伤	5	脸部	9	脸部擦伤	1	轻度
163	2018.1.20	3	男	12	摔伤	1	右腕部	3	右腕外伤	1	轻度
164	2018.1.20	3	女	33	挫伤	5	双膝部	2	双膝疼痛	2	轻度
165	2018.1.20	3	男	4	挫伤	5	臀部疼痛	4	臀部疼痛	3	轻度
166	2018.1.20	3	男	22	摔伤	1	左腕部	3	左腕外伤	1	轻度
167	2018.1.21	3	女	34	摔伤	1	头部	1	脑震荡	5	轻度
168	2018.1.21	3	男	3	摔伤	1	口腔	9	口腔裂口	6	轻度
169	2018.1.22	3	男	11	摔伤	1	右腕部	3	右腕外伤	1	轻度
170	2018.1.22	3	女	8	摔伤	1	双膝部	2	双膝外伤	1	轻度
171	2018.1.22	3	女	21	挫伤	5	左拇指	3	左拇指外伤	1	轻度
172	2018.1.23	3	男	18	摔伤	1	胸部	6	肺出血	5	中度
173	2018.1.23	3	男	17	扭伤	4	左踝部	10	左踝外伤	1	轻度
174	2018.1.23	3	男	17	摔伤	1	右侧胸部	6	软组织挫伤	3	轻度
175	2018.1.24	3	男	12	挫伤	5	左腕部	3	左腕骨折	4	中度
176	2018.1.24	3	男	17	挫伤	5	左侧腰部	4	腰部外伤	1	轻度
177	2018.1.26	3	男	34	撞伤	2	左臂	7	左臂外伤	1	轻度
178	2018.1.26	3	女	20	摔伤	1	右腕部	3	右腕骨裂	4	中度
179	2018.1.26	3	男	27	扭伤	4	左踝部	10	韧带拉伤	2	轻度
180	2018.1.27	3	女	27	摔伤	1	左膝	2	左膝外伤	1	轻度
181	2018.1.27	3	男	45	摔伤	1	右臂	7	肱骨干骨折	4	中度
182	2018.1.27	3	男	22	挫伤	5	左膝	2	左膝外伤	1	轻度
183	2018.1.27	3	男	41	摔伤	1	右手	3	右手外伤	1	轻度
184	2018.1.27	3	女	26	摔伤	1	左手	3	左手疼痛	6	轻度
185	2018.1.27	3	女	31	摔伤	1	右膝部	2	右膝外伤	1	轻度
186	2018.1.28	3	女	28	摔伤	1	右膝部	2	右膝外伤	1	轻度
187	2018.1.28	3	女	21	挫伤	5	臀部疼痛	4	臀部外伤	1	轻度
188	2018.1.28	3	女	47	挫伤	5	右膝部	2	右膝外伤	1	轻度
189	2018.1.28	3	男	37	挫伤	5	左侧锁骨	6	锁骨外伤	1	轻度
190	2018.1.29	3	女	22	扭伤	4	右脚	7	右脚外伤	1	轻度
191	2018.1.29	3	男	25	挫伤	5	右肩部	8	右肩外伤	1	轻度
192	2018.1.29	3	女	31	摔伤	1	右膝部	2	右膝外伤	1	轻度
193	2018.1.30	3	男	10	摔伤	1	左脚	5	左脚外伤	1	轻度
194	2018.1.31	3	男	28	摔伤	1	头部	1	头部外伤	1	轻度
195	2018.2.1	4	男	43	扭伤	4	右膝部	2	右膝外伤	1	轻度
196	2018.2.1	4	男	20	摔伤	1	头部	1	擦伤	1	轻度
197	2.18.2.2	4	女	34	摔伤	1	臀部疼痛	4	尾椎	4	轻度
198	2018.2.2	4	女		摔伤	1	右腕部	3	韧带拉伤	2	轻度
199	2018.2.3	4	男	35	扭伤	4	左膝	2	外伤	1	轻度
200	2018.2.3	4	男	35	摔伤	1	右膝部	2	右膝外伤	1	轻度
201	2018.2.3	4	女	30	摔伤	1	臀部	4	尾椎外伤	1	轻度
202	2018.2.3	4	男	36	摔伤	1	锁骨	6	右锁骨骨折	4	中度
203	2018.2.4	4	女	36	摔伤	1	右膝部	2	右膝外伤	1	轻度
204	2018.2.4	4	男	8	摔伤	1	左肩部	8	左肩骨折	4	中度
205	2018.2.4	4	男	29	摔伤	1	腰部	4	腰部外伤	1	轻度
206	2018.2.4	4	男	31	摔伤	1	右腿部	5	右大腿裂伤	3	轻度
207	2018.2.4	4	男	37	摔伤	1	右膝部	2	韧带拉伤	2	轻度
208	2018.2.4	4	男	27	摔伤	1	左拇指	3	拇指外伤	1	轻度
209	2018.2.5	4	男	24	摔伤	1	腹部	6	右侧腹部外伤	1	轻度
210	2018.2.5	4	男	4	扭伤	4	右膝部	2	右膝外伤	1	轻度
211	2018.2.5	4	女	27	扭伤	4	左踝部	10	外踝骨折	4	中度
212	2018.2.6	4	女	9	挫伤	5	拇指疼痛	3	拇指外伤	1	轻度
213	2018.2.6	4	女	29	摔伤	1	右肩部	8	肩关节脱位	2	轻度
214	2018.2.7	4	男	4	摔伤	1	左肩部	8	肩关节脱位	2	轻度
215	2018.2.7	4	男	12	撞伤	2	腰部	4	腰部外伤	1	轻度
216	2018.2.7	4	女	12	摔伤	1	左前臂	7	左前臂外伤	1	轻度
217	2018.2.7	4	女	36	摔伤	1	左膝部	2	韧带拉伤	2	轻度
218	2018.2.8	4	男	10	摔伤	1	头部	1	轻微脑震荡	5	轻度
219	2018.2.8	4	男	9	撞伤	2	头部	1	轻微脑震荡	5	轻度
220	2018.2.8	4	男	12	撞伤	2	右腿部	5	右腿外伤	1	轻度
221	2018.2.9	4	男	25	摔伤	1	右膝部	2	韧带拉伤	2	轻度
222	2018.2.9	4	男	29	摔伤	1	右膝部	2	韧带断裂	2	中度
223	2018.2.9	4	女	30	摔伤	1	左肩部	8	肩峰骨折	4	中度
224	2018.2.9	4	男	40	摔伤	1	左膝部	2	韧带拉伤	2	轻度
225	2018.2.10	4	女	38	擦伤	7	右肘部	7	肘部擦伤	1	轻度
226	2018.2.11	4	女	15	摔伤	1	右手腕	3	右手腕外伤	1	轻度
227	2018.2.11	4	女	47	摔伤	1	髋部	4	盆骨骨折	4	中度
228	2018.2.11	4	男	36	摔伤	1	右手腕	3	右手腕外伤	1	轻度
229	2018.2.12	4	男	38	摔伤	1	左腕部	3	左腕外伤	1	轻度
230	2018.2.12	4	女	20	摔伤	1	左膝部	2	肌肉拉伤	3	轻度
231	2018.2.12	4	男	50	摔伤	1	右肘部	7	右肘外伤	1	轻度
232	2018.2.12	4	男	10	摔伤	1	右腕部	3	右腕外伤	1	轻度
233	2018.2.12	4	男	15	摔伤	1	右腕部	3	右腕外伤	1	轻度
234	2018.2.12	4	女	17	摔伤	1	胸部	6	肌肉拉伤	3	轻度
235	2018.2.12	4	男	37	摔伤	1	左肩部	8	肩关节脱位	2	轻度
236	2018.2.13	4	男	6	摔伤	1	脸部	9	脸部擦伤	1	轻度
237	2018.2.13	4	男	37	摔伤	1	右踝部	10	右踝外伤	1	轻度
238	2018.2.13	4	男	24	摔伤	1	臀部	4	臀部外伤	1	轻度
239	2018.2.14	4	男	54	摔伤	1	脸部	9	擦伤	1	轻度
240	2018.2.17	4	男	10	摔伤	1	右膝部	2	右膝外伤	1	轻度
241	2018.2.17	4	女	33	摔伤	1	左腕部	3	左桡骨骨折	4	中度
242	2018.2.17	4	女	11	摔伤	1	唇部	9	唇部外伤	1	轻度
243	2018.2.18	4	男	24	摔伤	1	右肘部	7	右肘部脱臼	2	轻度
244	2018.2.18	4	女	12	摔伤	1	头部	1	脑震荡	5	轻度
245	2018.2.18	4	女	6	撞伤	2	背部	8	软组织挫伤	3	轻度
246	2018.2.18	4	女	6.5	撞伤	2	胸部	6	软组织挫伤	3	轻度
247	2018.2.18	4	女	35	摔伤	1	背部	8	背部外伤	1	轻度
248	2018.2.18	4	男	27	摔伤	1	右胸部	6	肋骨骨折	4	中度
249	2018.2.18	4	女	38	摔伤	1	左膝部	2	韧带拉伤	2	轻度
250	2018.2.18	4	女	52	摔伤	1	右髋部	4	右股骨颈骨折	4	中度
251	2018.2.18	4	男	17	摔伤	1	头部	1	轻微脑震荡	5	轻度
252	2018.2.18	4	男	44	摔伤	1	左膝部	2	韧带拉伤	2	轻度
253	2018.2.18	4	男	40	摔伤	1	左小腿	5	韧带断裂	2	中度
254	2018.2.19	4	男	36	摔伤	1	膝关节	2	膝关节外伤	1	轻度
255	2018.2.19	4	女	25	摔伤	1	左腕部	3	左腕外伤	1	轻度
256	2018.2.19	4	男	54	摔伤	1	胸部	6	胸部外伤	1	轻度
257	2018.2.19	4	女	43	摔伤	1	右膝部	2	右膝外伤	1	轻度
258	2018.2.19	4	女	8	摔伤	1	右肩部	8	右肩外伤	1	轻度
259	2018.2.20	4	男	47	摔伤	1	头部	1	颈椎外伤	1	轻度
260	2018.2.20	4	女	36	摔伤	1	下肢	5	下肢外伤	1	轻度
261	2018.2.20	4	女	10						6	轻度
262	2018.2.20	4	男	23	摔伤	1	左拇指	3	左拇指骨折	4	中度
263	2018.2.20	4	女	58	摔伤	1	左大腿	5	左股骨颈骨折	4	中度
264	2018.2.20	4	男	8	摔伤	1	脸部	9	擦伤	1	轻度
265	2018.2.20	4	男	10	撞伤	2	后背	8	后背外伤	1	轻度
266	2018.2.20	4	男	32	撞伤	2	腿部	5	小腿外伤	1	轻度
267	2018.2.20	4	男	9	摔伤	1	右腿部	5	右胫骨骨折	4	中度
268	2018.2.20	4	男	13	摔伤	1	右腿部	5	韧带拉伤	2	轻度
269	2018.2.20	4	男	49	摔伤	1	左膝部	2	韧带断裂	2	中度
270	2018.2.21	4	女	34	撞伤	2	右肩峰	8	肩关节骨折	4	中度
271	2018.2.21	4	女	12	撞伤	2	右臂	7	右臂外伤	1	轻度
272	2018.2.21	4	男	33	摔伤	1	左眼部	9	左眼外伤	1	轻度
273	2018.2.21	4	女	14	摔伤	1	左腿部	5	左腿外伤	1	轻度
274	2018.2.21	4	女	14	摔伤	1	头部	1	脑震荡	5	轻度
275	2018.2.21	4	女	11	摔伤	1	左踝部	10	左踝骨裂	4	中度
276	2018.2.21	4	男	33	摔伤	1	左膝部	2	左膝外伤	1	轻度
277	2018.2.21	4	男	36	摔伤	1	右膝部	2	右膝外伤	1	轻度
278	2018.2.21	4	男	15	摔伤	1	鼻子	9	鼻骨骨折	4	中度
279	2018.2.21	4	男	26	摔伤	1	右膝部	2	右膝外伤	1	轻度
280	2018.2.21	4	女	36	摔伤	1	右拇指	3	右拇指外伤	1	轻度
281	2018.2.22	4	女	11	摔伤	1	左臂	7	左肘部骨折	4	中度
282	2018.2.23	4	男	22	摔伤	1	头部	1	脑震荡	5	轻度
283	2018.2.23	4	女	22	摔伤	1	右膝部	2	右膝外伤	1	轻度
284	2018.2.23	4	男	59	摔伤	1	左手掌	3	左手外伤	1	轻度
285	2018.2.24	4	男	31	摔伤	1	左肩部	8	左肩脱臼	2	轻度
286	2018.2.24	4	男	39	摔伤	1	左小指	3	左小指外伤	1	轻度
287	2018.2.25	4	女	24	摔伤	1	唇部	9	唇部外伤	1	轻度
288	2018.2.26	4	女	22	摔伤	1	左手腕	3	左桡骨骨折	4	中度
289	2018.2.26	4	女	18	摔伤	1	右手腕	3	右桡骨骨折	4	中度
290	2018.2.29	4	男	26	摔伤	1	右膝部	2	右膝外伤	1	轻度
291	2018.2.28	4	男	24	摔伤	1	左肩部	8	左肩脱臼	2	轻度
292	2018.2.28	4	女	60	挫伤	5	左腕部	3	左腕外伤	1	轻度
293	2018.3.01	5	女	59	挫伤	5	左腕外伤	3	桡骨骨折	4	中度
294	2018.3.01	5	男	35	扭伤	4	右踝	10	右踝外伤	1	轻度
295	2018.3.01	5	女	20	扭伤	4	右膝部	2	韧带拉伤	2	轻度
296	2018.3.02	5	男	38	摔伤	1	右腿	5	右腿外伤	1	轻度
297	2018.3.03	5	男	23	摔伤	1	右肩部	8	右肩脱位	2	轻度
298	2018.3.03	5	男	43	撞伤	2	左膝部	2	韧带拉伤	2	轻度
299	2018.3.03	5	女	14	摔伤	1	左前臂	7	左前臂骨折	4	中度
300	2018.3.03	5	男	35	摔伤	1	臀部	4	肌肉拉伤	3	轻度
301	2018.3.03	5	女	43	摔伤	1	右膝部	2	肌肉血肿	3	轻度
302	2018.3.03	5	女	34	摔伤	1	右膝部	2	韧带拉伤	2	轻度
303	2018.3.04	5	女	25	摔伤	1	右腕部	3	右腕外伤	1	轻度
304	2018.3.04	5	女	36	摔伤	1	右眼	9	右眼外伤	1	轻度
305	2018.3.05	5	女	18	摔伤	1	左肩部	8	左锁骨骨折	4	中度
306	2018.3.05	5	女	27	摔伤	1	左膝盖	2	左膝外伤	1	轻度
307	2018.3.09	5	男	33	摔伤	1	右踝部	10	韧带拉伤	2	轻度
308	2018.3.09	5	男	34	摔伤	1	右肩部	8	肌肉拉伤	3	轻度
309	2018.3.09	5	女	41	摔伤	1	后背部	8	多发性肋骨骨折	4	中度
310	2018.3.10	5	男	10	摔伤	1	右膝部	2	韧带拉伤	2	轻度
311	2018.3.10	5	男	25	摔伤	1	右眼部	9	右眼巩膜血肿	6	轻度
312	2018.3.10	5	男	28	摔伤	1	颌部	9	颌部擦伤	1	轻度
313	2018.3.10	5	男	29	摔伤	1	左腕	3	左腕外伤	1	轻度
314	2018.3.10	5	男	20	摔伤	1	左肩部	8	左肩关节脱位	2	轻度
315	2018.3.11	5	女	22	摔伤	1	脸部	9	脸部擦伤	1	轻度
316	2018.3.11	5	女	29	摔伤	1	头部	1	蛛网膜下腔出血	5	重度
317	2018.3.11	5	男	30	摔伤	1	头部	1	头晕	6	轻度
318	2018.3.11	5	女	7	撞伤	2	鼻梁	9	鼻梁外伤	1	轻度
319	2018.3.11	5	男	32	摔伤	1	右膝部	2	右膝韧带拉伤	2	轻度
320	2018.3.14	5	男	42	摔伤	1	左侧胸部	6	肌肉拉伤	3	轻度
321	2018.3.14	5	男	22	摔伤	1	左胸部	6	肋骨骨折	4	中度

## Sheet: 富龙2018-2019雪季
序号	日期	月份编号	性别	年龄	受伤时间	受伤原因	受伤原因（1-摔伤；2-撞伤；3-划伤，扎伤；4-扭伤；5-挫伤；6-碰伤；7-擦伤；8-其他）	受伤地点	初步诊断	损伤类型（1-擦伤和外伤；2-关节损伤及韧带受损；3-肌肉拉伤及软组织损伤；4-骨折，骨裂；5-脑震荡及内脏；6-其他）	受伤部位受伤部位（1-头部（脑部：1.1）；2-膝关节；3-手腕手指；4-腰臀；5-下肢；6-胸肋腹；7-上肢；8-肩背；9-面颈部；10-脚踝；11-软组织）	处理意见	受伤程度
1	2018.11.15	1	男	30	15:00:00	摔伤	1	B5	右食指搽伤	1	3	包扎、消毒	轻度
2	2018.11.16	1	男	41	10:30:00	被撞	2	B6	右小腿搽伤	1	5	消毒、包扎	轻度
3	2018.11.17	1	男	39	11:41:00	摔伤	1	B6	左侧韧带拉伤	2	5	云南白药喷雾、观察	轻度
4	2018.11.18	1	女	36	14:00:00	摔伤	1	A5	轻微脑震荡	5	1.1	观察、休息	轻度
5	2018.11.20	1	女	23	13:00:00	摔伤	1	初级道	左面部淤青	3	9	冷敷、休息	轻度
6	2018.11.24	1	女	9	10:00:00	撞伤	2	初级道	右眼睑血肿	3	9	冷敷、观察	轻度
7	2018.11.24	1	女	5	12:03:00	自摔	1	初级道	左前臂外伤	1	7	云南白药喷雾、观察	轻度
8	2018.11.24	1	女	34	13:30:00	扭伤	4	中级道	左侧腓骨骨折	4	5	建议医院X检查	中度
9	2018.11.25	1	男	10	10:30:00	摔伤	1	A8	左手腕骨折及脱臼	4	3	建议医院X检查	中度
10	2018.11.25	1	女	28	14:45:00	摔伤	1	B9	左前臂骨折	4	7	建议医院X检查	中度
11	2018.11.25	1	男	32	15:30:00	摔伤	1	B10	左前臂双骨折	4	7	夹板固定建议医院X检查	中度
12	2018.11.28	1	女	26	11:00:00	相撞	2	B12	左胸壁软组织损伤	3	6	观察，云南白药喷雾	轻度
13	2018.11.28	1	男	31	12:00:00	摔伤	1	B10	右肩关节韧带拉伤	2	8	观察、建议核磁检查	轻度
14	2018.11.28	1	女	23	15:30:00	摔伤	1	B11	左肱骨头骨裂	4	7	建议X检查	中度
15	2018.11.29	1	女	31	11:15:00	相撞	2	B12	轻微脑震荡	5	1.1	观察、休息，	轻度
16	2018.11.29	1	女	28	14:30:00	摔伤	1	B10	右手腕骨折	4	3	建议医院X检查	中度
17	2018.11.30	1	女	37	13:00:00	摔伤	1	B6	左肱骨头脱位	2	7	建议X检查	轻度
18	2018.11.30	1	女	24	14:48:00	摔伤	1	B10	左踝部韧带拉伤	2	9	建议MRI检查	轻度
19	2018.12.01	2	男	53	11:10:00	摔伤	1	13901189269	左肩关节脱位	2	8	建议X检查	轻度
20	2018.12.01	2	女	29	12:00:00	撞伤	2	13910123511	鼻部骨折	4	9	建议X检查	中度
21	2018.12.01	2	女	26	12:00:00	摔伤	1	13811573759	左髋部扭伤	2	4	观察、建议MRI	轻度
22	2018.12.01	2	男	31	13:40:00	摔伤	1	18501181062	左膝外伤	1	2	建议MRI检查	轻度
23	2018.12.01	2	男	33	14:10:00	撞伤	2	18811064648	左锁骨骨折	4	6	建议X检查	中度
24	2018.12.01	2	女	29	14:10:00	撞伤	2	15011211636	右前臂外伤	1	7	建议X检查	轻度
25	2018.12.01	2	男	54	14:40:00	撞伤	2	13801100583	右肩胛区外伤	1	8	建议MRI检查	轻度
26	2018.12.01	2	女	32	14:47:00	撞伤	2	17610107062	右锁骨骨裂	4	6	建议X检查	轻度
27	2018.12.01	2	女	19	15:35:00	摔伤	1	18610807594	颜面部搽伤	1	9	消毒	轻度
28	2018.12.01	2	女	24	15:45:00	摔伤	1	13426073372	左锁骨骨折	4	6	建议X检查	中度
29	2018.12.01	2	男	43	18:20:00	摔伤	1	18231356015	右锁骨粉碎性骨折	4	6	建议X检查	中度
30	2018.12.01	2	男	12	18:25:00	摔伤	1	18231356015	右腿膝关节外伤	1	2	建议MRI检查	轻度
31	2018.12.02	2	女	2	10:10:00	碰伤	6	15650701579	额头血肿	3	1	建议CT检查	轻度
32	2018.12.02	2	女	28	10:35:00	碰伤	6	18513149936	额头血肿	3	1	观察，	轻度
33	2018.12.02	2	男	37	11:00:00	碰伤	6	18898613512	鼻部外伤	1	9	消毒、包扎	轻度
34	2018.12.02	2	女	32	11:50:00	碰伤	6	13488677993	左膝 外伤	1	2	建议MRI检查	轻度
35	2018.12.02	2	男	25	14:55:00	碰伤	6	13071161770	左侧软组织损伤	3	11	建议MRI检查	轻度
36	2018.12.02	2	男	31	15:00:00	摔伤	1	18611799594	左肱骨粉碎性骨折	4	7	建议X检查	中度
37	2018.12.3	2	女	25	16:20:00	摔伤	1	18055852054	左膝外伤	1	2	建议MRI检查	轻伤
38	2018.12.4	2	男	16	10:10:00	摔伤	1	13294061821	右拇指韧带拉伤	2	3	建议MRI检查	轻伤
39	2018.12.4	2	女	30	12:25:00	摔伤	1	13810748915	腰椎压缩性骨折	4	4	建议X检查	中度
40	2018.12.4	2	男	26	15:00:00	撞伤	2	15810729333	右眼部外伤	1	9	建议CT检查	轻度
41	2018.12.4	2	男	23	15:45:00	摔伤	1	18811798615	面部搽伤	1	9	清洗、消毒	轻度
42	2018.12.5	2	女	16	11:30:00	摔伤	1	13784578361	双侧膝部搽伤	1	2	清洗、消毒，建议X	轻度
43	2018.12.6	2	女	33	15:30:00	摔伤	1	17600044517	双膝外伤	1	2	云南白药喷雾	轻度
44	2018.12.6	2	女	30	16:10:00	摔伤	1	15882407833	右肩 韧带拉伤	2	8	建议MRI检查	轻度
45	2018.12.8	2	男	6	15:10:00	压伤	8	13811728940	左腕肌肉拉伤	3	3	建议X检查	轻度
46	2018.12.8	2	女	29	16:50:00	摔伤	1	15801468721	左前臂肌肉拉伤	3	7	喷雾、观察	轻度
47	2018.12.8	2	女	35	18:30:00	碰伤	6	15811337730	左肩胛骨粉碎性骨折	4	8	建议X检查	中度
48	2018.12.8	2	男	28	10:25:00	摔伤	1	13466669356	左肩韧带拉伤	2	8	建议MRI检查	轻度
49	2018.12.8	2	女	25	11:25:00	摔伤	1	13002003870	左肘部肌肉拉伤	3	7	建议MRI检查	轻度
50	2018.12.8	2	男	6	20:30:00	摔伤	1	13693017891	右膝韧带拉伤	2	2	建议MRI检查	轻度
51	2018.12.9	2	男	38	10:20:00	摔伤	1	18810259818	右小腿韧带拉伤	2	5	建议MRI检查	轻度
52	2018.12.9	2	女	27	12:05:00	摔伤	1	15210515346	尾椎外伤	1	4	观察	轻度
53	2018.12.9	2	女	16	12:55:00	撞伤	2	15611510250	左股骨下端骨折	4	5	建议X检查	中度
54	2018.12.9	2	女	28	13:00:00	摔伤	1	13911641003	胸部软组织损伤	3	6	休息、观察	轻度
55	2018.12.9	2	男	31	13:25:00	摔伤	1	18612946105	右腿 韧带拉伤	2	5	休息 、建议MRI	轻度
56	2018.12.9	2	男	4	15:30:00	摔伤	1	18518316033	左侧韧带拉伤	2	5	休息 、建议MRI	轻度
57	2018.12.10	2	男	26	11:40:00	撞伤	2	15703649999	左肩韧带拉伤	2	8	休息，观察	轻度
58	2018.12.12	2	女	31	15:45:00	撞伤	2	18633011169	右踝韧带拉伤	2	10	云南白药喷雾	轻度
59	2018.12.12	2	男	32	15:45:00	撞伤	2	17301161015	右腕韧带拉伤	2	3	云南白药喷雾	轻度
60	2018.12.13	2	女	34	14:30:00	扭伤	4	15811033047	腰部扭伤	3	4	云南白药喷雾，观察	轻度
61	2018.12.13	2	女	32	20:04:00	搽伤	7	13581759477	下颌搽伤	1	9	清洗、消毒	轻度
62	2018.12.14	2	男	57	12:20:00	摔伤	1	13801128535	右前臂软组织损伤	3	7	休息、对症治疗	轻度
63	2018.12.14	2	男	26	13:05:00	碰伤	6	15229737227	舌尖搽伤	1	9	清洗、消毒	轻度
64	2018.12.14	2	男	23	16:45:00	摔伤	1	17610248152	左肩肌肉拉伤	3	8	观察、建议X检查	轻度
65	2018.12.14	2	男	31	19:35:00	摔伤	1	18601968833	右肩关节脱位	2	8	建议X检查	轻度
66	2018.12.15	2	男	27	13;28	摔伤	1	13917617647	腰大肌拉伤	3	4	建议MRI检查	轻度
67	2018.12.15	2	男	27	13:40:00	摔伤	1	18666668823	右肩关节扭伤	2	8	休息、对症治疗	轻度
68	2018.12.15	2	男	29	14:00:00	摔伤	1	18511190106	左中指骨裂	4	3	建议X检查	中度
69	2018.12.15	2	男	30	14:10:00	摔伤	1	18618485271	左髋关节韧带拉伤	2	4	观察、建议MRI	轻度
70	2018.12.15	2	男	28	14:45:00	摔伤	1	18618347525	右肩关节软组织损伤	3	8	观察、建议MRI	轻度
71	2018.12.15	2	女	27	15:00:00	摔伤	1	15600608269	双下肢软组织损伤	3	5	观察、建议MRI	轻度
72	2018.12.15	2	女	23	10:15:00	撞伤	2	18600020931	轻微脑震荡	5	1.1	观察，建议CT检查	轻度
73	2018.12.16	2	男	6	14:30:00	摔伤	1	18613873928	左腕肌肉拉伤	3	3	建议X检查	轻度
74	2018.12.16	2	女	42	15:07:00	摔伤	1	18611735050	左手腕骨折	4	3	建议X检查	中度
75	2018.12.16	2	男	17	19:35:00	摔伤	1	18510574042	右前臂软组织损伤	3	7	建议MRI检查	轻度
76	2018.12.17	2	男	17	10:10:00	摔伤	1	18803039280	唇部外伤	1	9	清洗、消毒	轻度
77	2018.12.17	2	女	29	12:35:00	摔伤	1	13693603030	左前臂尺骨骨折	4	7	建议MRI检查	中度
78	2018.12.17	2	男	58	15:00:00	摔伤	1	15650703111	右腕肌肉拉伤	3	3	休息、观察	轻度
79	2018.12.17	2	女	11	15:25:00	撞伤	2	15641573671	轻微脑震荡	5	1.1	观察，建议CT检查	轻度
80	2018.12.17	2	男	57	16:30:00	撞伤	2	13901233446	右肩关节软组织损伤	3	8	休息，观察、喷雾	轻度
81	2018.12.17	2	男	28	17:30:00	撞伤	2	18080716896	鼻部裂伤	4	9	去医院缝合	轻度
82	2018.12.17	2	男	21	07:55:00	压伤	8		右食指无名指压伤	1	3	上一级医院处理	轻度
83	2018.12.18	2	女	31	13:08:00	摔伤	1	18817350619	右膝韧带拉伤	2	2	建议MRI检查	轻度
84	2018.12.18	2	女	13	14:05:00	摔伤	1	13701310789	左侧膝关节韧带拉伤	2	2	建议MRI检查	轻度
85	2018.12.18	2	男	33	16:06:00	摔伤	1	13911162316	右踝韧带拉伤	2	10	观察、建议MRI	轻度
86	2018.12.18	2	男	30	21:21:00	摔伤	1	18618199225	左肱骨头下骨折	4	7	建议X检查	中度
87	2018.12.20	2	女	18	14:50:00	摔伤	1	18903131102	左大腿软组织损伤	3	5	云南白药气雾剂	轻度
88	2018.12.20	2	男	17	17:05:00	摔伤	1	18932373696	下颌擦伤	1	9	消毒包扎	轻度
89	2018.12.20	2	男	7	19:10:00	摔伤	1	18601259012	颜面部擦伤	1	9	消毒包扎	轻度
90	2018.12.20	2	女	22	19:40:00	撞伤	2	18515303374	面部、唇部擦伤鼻部骨折	4	9	建议CT检查	中度
91	2018.12.20	2	男	45	19:40:00	撞伤	2	13907028387	面部、头部擦伤	1	1	消毒包扎建议CT检查	轻度
92	2018.12.21	2	男	18	11:08:00	摔伤	1	18832375971	左大腿肌肉拉伤	3	5	建议X检查	轻度
93	2018.12.21	2	女	18	11:08:00	摔伤	1	13031967651	左髋部外伤	1	4	建议X检查	轻度
94	2018.12.21	2	男	18	11:28:00	摔伤	1	6598539596	左腕关节	2	3	喷雾、休息	轻度
95	2018.12.21	2	女	40	12:28:00	摔伤	1	13501064621	右肩肌肉拉伤	3	8	冰敷、观察	轻度
96	2018.12.21	2	女	37	13:28:00	摔伤	1	13717510016	左肩擦伤	1	8	建议X检查	轻度
97	2018.12.21	2	男	31	18:50:00	摔伤	1	15042653333	右腹部肌肉拉伤	3	6	云南白药喷雾，观察	轻度
98	2018.12.22	2	男	40	11:00:00	摔伤	1	18671988666	右踝部扭伤	2	10	云南白药气雾剂休息	轻度
99	2018.12.22	2	女	51	11:07:00	撞伤	2	13902006959	右肩关节脱位	2	8	建议X检查	轻度
100	2018.12.22	2	女	22	11:50:00	摔伤	1	13908083332	右膝关节损伤	2	2	建议X检查	轻度
101	2018.12.22	2	女	26	12:30:00	摔伤	1	13693028565	右手背关节拉伤	2	3	云南白药气雾剂休息	轻度
102	2018.12.22	2	男	33	12:50:00	撞伤	2	18611653183	右膝内侧韧带拉伤	2	2	建议MRI检查	轻度
103	2018.12.22	2	女	28	14:10:00	撞伤	2	15910614565	轻微脑震荡	5	1.1	建议MRI检查	轻度
104	2018.12.22	2	女	35	15:15:00	摔伤	1	13426216636	腹部外伤	1	6	建议B超检查	轻度
105	2018.12.22	2	男	26	15:20:00	撞伤	2	13901307461	右腕关节损伤	2	3	云南白药气雾剂冷敷	轻度
106	2018.12.22	2	男	42	19:15:00	摔伤	1	15001107500	右腓骨上段骨折	4	5	建议X检查	中度
107	2018.12.22	2	女	22	20:30:00	摔伤	1	18253231929	软组织损伤	3	11	建议X检查	轻度
108	2018.12.22	2	女	15	20:42:00	摔伤	1	15711477815	肌肉损伤	3	11	建议X检查	轻度
109	2018.12.22	2	男	27	21:10:00	摔伤	1	15102151051	左肩关节脱位	2	8	建议X检查	轻度
110	2018.12.23	2	女	37	11:15:00	脱位	8	13810176853	左肩关节脱位	2	8	建议X检查复位	轻度
111	2018.12.23	2	女	37	11:10:00	摔伤	1	15001381037	腰部扭伤	3	4	休息。观察	轻度
112	2018.12.23	2	女	25	11:18:00	摔伤	1	18222286501	双膝外伤	1	2	云南白药喷雾，观察	轻度
113	2018.12.23	2	女	29	11:50:00	摔伤	1	15710039477	右侧韧带拉伤	2	5	建议X检查	轻度
114	2018.12.23	2	女	29	14:35:00	摔伤	1	15010067271	左膝 外伤	1	2	观察，建议CT检查	轻度
115	2018.12.23	2	男	28	15:08:00	摔伤	1	13426311558	轻微脑震荡	5	1.1	建议CT检查	轻度
116	2018.12.23	2	女	22	18:50:00	摔伤	1	13391377626	下颌裂伤	4	9	去医院缝合	轻度
117	2018.12.24	2	女	26	13:00:00	摔伤	1	13107726603	左肘部扭伤	2	7	建议MRI检查	轻度
118	2018.12.24	2	男	27	13:13:00	摔伤	1	18645986680	右小指骨折	4	3	建议X检查	中度
119	2018.12.24	2	女	29	18:45:00	挫伤	5	15019261630	右拇指搽伤	1	3	清洗、消毒	轻度
120	2018.12.25	2	男	40	10:00:00	撞伤	2	13370140218	左髋韧带拉伤	2	4	建议X检查	轻度
121	2018.12.25	2	男	36	13:57:00	撞伤	2	18612668866	左背部肌肉拉伤	3	8	观察、建议MRI	轻度
122	2018.12.26	2	男	18	10:55:00	摔伤	1	15732308608	左腕肌肉拉伤	3	3	云南白药喷雾，观察	轻度
123	2018.12.26	2	男	33	14:40:00	摔伤	1	18611188909	右肩肌肉拉伤	3	8	云南白药喷雾，观察	轻度
124	2018.12.26	2	男	45	19:10:00	摔伤	1	13880134967	右小腿裂伤	3	5	去医院缝合	轻度
125	2018.12.27	2	女	36	10:37:00	摔伤	1	18601919019	尾椎外伤	1	4	建议X检查	轻度
126	2018.12.27	2	女	21	14:40:00	碰伤	6	15831361660	上唇外伤	1	9	建议医院治疗	轻度
127	2018.12.27	2	女	17	15:40:00	摔伤	1	18233523226	右膝外伤	1	2	云喷、观察	轻度
128	2018.12.28	2	男	3	17:00:00	碰伤	6	18610278074	头部碰伤	1	1	消毒、清洗包扎	轻度
129	2018.12.28	2	女	38		摔伤	1	18675527818	右膝血肿	3	2	云南白药喷雾、观察	轻度
130	2018.12.29	2	男	28	10:18:00	摔伤	1	13611060161	右拇指韧带拉伤	2	3	冷敷、观察	轻度
131	2018.12.29	2	男	35	19:40:00	摔伤	1	13911660816	左手腕骨折	4	3	建议X检查	中度
132	2018.12.30	2	男	4	10:47:00	碰伤	6	13811501213	左眼搽伤	1	9	清洗、消毒	轻伤
133	2018.12.30	2	男	14	11:15:00	摔伤	1	13801128224	双踝韧带扭伤	2	10	云南白药喷雾，观察	轻伤
134	2018.12.30	2	男	49	11:40:00	被撞	2	13311019168	腰肌扭伤	3	4	建议X检查	轻伤
135	2018.12.30	2	女	39	11:50:00	撞伤	2	13811650624	左手掌骨粉碎性骨折	4	3	建议X检查	中度
136	2018.12.30	2	男	13	12:20:00	摔伤	1	15910798366	腰椎压缩性骨折	4	4	建议X检查	中度
137	2018.12.30	2	男	25	13:30:00	摔伤	1	13104658566	轻微脑震荡	5	1.1	建议CT检查	轻度
138	2018.12.30	2	女	12	13:35:00	摔伤	1	18601161006	唇部外伤	1	9	清洗，消毒，	轻度
139	2018.12.30	2	女	30	13:35:00	摔伤	1	18610307008	右髋关节韧带拉伤	2	4	建议MRI检查	轻度
140	2018.12.30	2	男	27	13:55:00	撞伤	2	15210367856	左臀部肌肉拉伤	3	4	休息。观察	轻度
141	2018.12.30	2	女	26	13:57:00	摔伤	1	13718755811	右侧胸部软组织损伤	3	6	建议休息，对症治疗	轻度
142	2018.12.30	2	女	40	14:56:00	摔伤	1	13811655622	右小腿韧带断裂	2	5	建议MRI检查	中度
143	2018.12.30	2	男	27	16:25:00	摔伤	1	18513662913	胸部软组织损伤	3	6	云南白药喷雾，观察	轻度
144	2018.12.30	2	女	27	16:40:00	摔伤	1	13911899496	左膝扭伤	2	2	云南白药喷雾，观察	轻度
145	2018.12.30	2	男	22	17:00:00	摔伤	1	18006400750	右肘扭伤	2	7	云南白药喷雾，观察	轻度
146	2018.12.31	2	男	12	11:00:00	撞伤	2	13621110580	后背软组织损伤	3	8	建议休息，对症治疗	轻度
147	2018.12.31	2	男	13	11:30:00	撞伤	2	17801058310	右小腿肌肉拉伤	3	5	建议MRI检查	轻度
148	2018.12.31	2	男	44	11:30:00	摔伤	1	13911338550	左肩肌肉拉伤	3	8	建议MRI检查	轻度
149	2018.12.31	2	男	30	11:55:00	摔伤	1	13199111155	左胫骨中上段粉碎性骨折	4	5	建议X检查	中度
150	2018.12.31	2	男	38	12:30:00	摔伤	1	13910182829	左髋扭伤	2	4	建议MRI检查	轻度
151	2018.12.31	2	男	32	14:00:00	摔伤	1	18600002837	右背肌肉拉伤	3	8	休息、对症治疗	轻度
152	2018.12.31	2	女	15	14:10:00	撞伤	2	18246073401	下唇血肿	3	9	清洗，消毒，	轻度
153	2019.1.1	3	男	40	12:18:00	摔伤	1		头部外伤	1	1	清洗、消毒	轻度
154	2019.1.1	3	女	35	12:18:00	摔伤	1	18601361881	左踝韧带拉伤	2	10	建议MRI检查	轻度
155	2019.1.1	3	女	6	15:55:00	被撞	2	15810389497	左胫骨肌肉拉伤	3	5	休息，对症治疗	轻度
156	2019.1.1	3	女	34	16:03:00	摔伤	1	13810615120	左膝韧带拉伤	2	2	休息，对症治疗	轻度
157	2019.1.2	3	男	40	15:40:00	摔伤	1	17545536519	右膝韧带拉伤	2	2	建议MRI检查	轻度
158	2019.1.3	3	男	21	15:05:00	摔伤	1	13552491597	脑震荡	5	1.1	建议CT检查	轻度
159	2019.1.4	3	男	11	19:30:00	摔伤	1	18817887527	腰椎软组织挫伤	3	4	建议CT检查	轻度
160	2019.1.5	3	男	9	11;30	摔伤	1	18611427730	上腹挫伤	3	6	建议B超检查	轻度
161	2019.1.5	3	男	7	12:25:00	摔伤	1	18901100990	鼻外伤	1	9	清洗、消毒	轻度
162	2019.1.5	3	男	10	13:45:00	摔伤	1	13901360781	右膝韧带拉伤	2	2	喷雾，休息、冷敷	轻度
163	2019.1.5	3	女	30	14:25:00	摔伤	1	13811277334	轻微脑震荡	5	1.1	建议CT检查	轻度
164	2019.1.6	3	女	28	12:00:00	摔伤	1	13018017373	胸部软组织损伤	3	6	休息、对症治疗	轻度
165	2019.1.6	3	男	29	12:45:00	摔伤	1	13466487616	左膝韧带拉伤	2	2	休息、对症治疗	轻度
166	2019.1.6	3	男	40	13:05:00	被撞	2	13911828397	轻微脑震荡	5	1.1	建议CT检查	轻度
167	2019.1.6	3	女	33	13:50:00	摔伤	1	13408668914	腰肌拉伤	3	4	休息、对症治疗	轻度
168	2019.1.6	3	男	27	14:45:00	摔伤	1	13706213304	右膝韧带拉伤	2	2	建议MRI检查	轻度
169	2019.1.7	3	女	29	19:40:00	摔伤	1	15350528777	左膝 韧带拉伤	2	2	建议MRI检查	轻度
170	2019.1.8	3	男	58	10:05:00	撞伤	2	13902747312	颈椎骨折	4	9	建议CT检查	中度
171	2019.1.8	3	男	21	10:05:00	撞伤	2	18945565858	左髋韧带拉伤	2	4	建议MRI检查	轻度
172	2019.1.8	3	女	13	11:30:00	摔伤	1	18246863705	左膝外伤	1	2	建议X检查	轻度
173	2019.1.9	3	女	13	09:10:00	碰伤	6	18052201563	右眼睑外伤	1	9	清洗、消毒、包扎	轻度
174	2019.1.10	3	女	28	10:15:00	摔伤	1	15652541203	蛛网膜下腔出血	5	1.1	建议CT检查	中度
175	2019.1.10	3	女	38	11:45:00	摔伤	1	13728881144	右肩软组织损伤	3	8	建议X检查	轻度
176	2019.1.10	3	男	38	15:15:00	摔伤	1	13585574475	左踝韧带拉伤	2	10	建议休息	轻度
177	2019.1.11	3	男	54	16:05:00	摔伤	1	13701230331	轻微脑震荡	5	1.1	观察、建议CT检查	轻度
178	2019.1.11	3	男	19	16:30:00	摔伤	1	18645345913	腰部肌肉拉伤	3	4	休息、对症治疗	轻度
179	2019.1.11	3	男	20	16:30:00	摔伤	1	15030257329	左胫骨肌肉拉伤	3	5	休息、对症治疗、喷雾	轻度
180	2019.1.11	3	男	28		撞伤	2	18101173703	左侧肋骨7、8骨折	4	6	建议X检查	中度
181	2018.1.12	3	男	30	13:12:00	摔伤	1	13810488471	左踝韧带拉伤	2	10	休息、对症治疗、喷雾	轻度
182	2018.1.12	3	女	34	12:35:00	撞伤	2	17875740016	右股骨中段骨折	4	5	建议X检查	中度
183	2019.1.12	3	男	25	14:45:00	摔伤	1	13801429865	腰部肌肉拉伤	3	4	休息、对症治疗、喷雾	轻度
184	2019.1.12	3	男	28	13:50:00	摔伤	1	13998179590	左手腕软组织损伤	3	3	云南白药喷雾、休息	轻度
185	2019.1.12	3	女	29	15:00:00	摔伤	1	15810217179	右腓骨远端骨折	4	5	建议X检查	中度
186	2019.1.13	3	女	27	12:55:00	摔伤	1	13948437796	轻微脑震荡	5	1.1	休息、建议CT检查	轻度
187	2019.1.13	3	女	29	14:05:00	摔伤	1	15204603033	右胫骨开放性骨折	4	5	建议X检查	中度
188	2019.1.13	3	女	26	14:45:00	摔伤	1	18510526336	右前臂肌肉拉伤	3	7	建议X检查	轻度
189	2019.1.13	3	女	38	14:05:00	摔伤	1	13061758892	右膝韧带拉伤	2	2	建议MRI检查	轻度
190	2019.1.14	3	女	25	12:20:00	摔伤	1	18801512006	疑诊肋骨骨裂	4	6	建议X检查	轻度
191	2019.1.14	3	男	24	13:40:00	摔伤	1	15001199959	右膝外伤	1	2	休息，对症治疗	轻度
192	2019.1.14	3	男	19	15:15:00	撞伤	2	17332405566	右髋肌肉拉伤	3	4	休息、对症治疗、喷雾	轻度
193	2019.1.15	3	女	23	10:00:00	摔伤	1	18843417620	右膝关节扭伤	2	2	喷雾，休息、冷敷	轻度
194	2019.1.15	3	女	12	11:00:00	摔伤	1	18641163918	右膝关节扭伤	2	2	建议X检查	轻度
195	2019.1.15	3	男	30	12:20:00	摔伤	1	13801363210	左肋骨搽伤	1	6	清洗、消毒、包扎	轻度
196	2019.1.15	3	男	4	12:55:00	咬伤	8	18600671080	舌尖裂伤	3	9	上一级医院缝合	轻度
197	2019.1.15	3	男	32	15:00:00	摔伤	1	13811923316	右锁骨中段骨折	4	6	建议X检查	中度
198	2019.1.15	3	男	48	16:20:00	摔伤	1	13701054433	左锁骨骨折	4	6	建议X检查	中度
199	2019.1.17	3	男	21	14:12:00	摔伤	1	15010079744	左手腕外伤	1	3	建议X检查	轻度
200	2019.1.17	3	女	20	12:05:00	摔伤	1	13324216880	右手掌外伤	1	3	云喷、冷敷	轻度
201	2019.1.17	3	男	24	11:05:00	摔伤	1	13933762628	右膝韧带拉伤	2	2	建议MRI检查	轻度
202	2019.1.17	3	女	21	16:10:00	摔伤	1	17845068981	左膝关节扭伤	2	2	云喷、冷敷、观察	轻度
203	2019.1.18	3	男	48	11:00:00	摔伤	1	15900220012	肋骨骨折	4	6	建议X检查	中度
204	2019.1.18	3	男	31	12:00:00	摔伤	1	15618555478	左挠骨骨折	4	7	建议X检查	中度
205	2019.1.18	3	男	30	12:15:00	摔伤	1	15192709999	左锁骨骨折	4	6	建议X检查	中度
206	2019.1.18	3	男	28	13:20:00	摔伤	1	15210077731	脊髓震荡	5	4	建议X检查	轻度
207	2019.1.18	3	男	24	13:45:00	摔伤	1	17604580821	胸椎软组织损伤	3	6	建议CT检查	轻度
208	2019.1.18	3	男	27	15:50:00	摔伤	1	15210091868	左面部擦伤	1	9	清洗、消毒、包扎	轻度
209	2019.1.18	3	女	10	16:10:00	摔伤	1	13693609096	左侧胸部软组织损伤	3	6	建议X检查	轻度
210	2019.1.19	3	男	44	11:50:00	摔伤	1	13910162032	左腕关节扭伤	2	3	建议X检查	轻度
211	2019.1.19	3	男	6	12:00:00	撞伤	2	18511751010	左大腿软组织损伤	3	5	云喷、休息、观察	轻度
212	2019.1.19	3	女	21	12:25:00	摔伤	1	13021956129	颈部肌肉拉伤	3	9	建议X检查	轻度
213	2019.1.19	3	女	29	13:10:00	摔伤	1	18210188786	腰大肌软组织挫伤	3	4	建议X检查	轻度
214	2019.1.19	3	男	39	13:20:00	摔伤	1	13501102267	左膝韧带拉伤	2	2	云喷、建议X线检查	轻度
215	2019.1.19	3	男	16	13:40:00	摔伤	1	13521198107	右腕肌肉拉伤	3	3	云喷、建议X线检查	轻度
216	2019.1.19	3	男	31	15:05:00	摔伤	1	13581906187	右锁骨骨折	4	6	建议X检查	中伤
217	2019.1.19	3	女	24	15:20:00	撞伤	2	15652953478	左胫骨肌肉拉伤	3	5	建议X检查	轻度
218	2019.1.19	3	女	27	16:20:00	摔伤	1	18332020232	左肩软组织损伤	3	8	云喷、冷敷、观察	轻度
219	2019.1.19	3	男	14	16:45:00	摔伤	1	13501180403	左小腿肌肉拉伤	3	5	休息、冰敷	轻度
220	2019.1.19	3	男	13	14:00:00	摔伤	1	15122773300	右掌骨骨折	4	7	建议X检查	中度
221	2019.1.19	3	女	10	19:42:00	撞伤	2	13661185426	肾挫裂伤	5	6	建议B超检查	轻度
222	2019.1.19	3	女	43	19:42:00	摔伤	1	13581999020	中切牙缺损	6	9	建议修复	轻度
223	2019.1.19	3	女	31	12:00:00	摔伤	1	18500867755	右小腿肌肉拉伤	3	5	建议MRI检查	轻度
224	2019.1.19	3	男	25	11:20:00	摔伤	1	13399969991	右膝韧带拉伤	2	2	建议休息、MRI	轻度
225	2019.1.20	3	女	33	11:20:00	摔伤	1	13701374549	右外侧踝部扭伤	2	10	休息、冰敷	轻度
226	2019.1.20	3	女	6	11:40:00	摔伤	1	13902098663	右小腿肌肉拉伤	3	5	建议X检查	轻度
227	2019.1.20	3	女	24	15:55:00	摔伤	1	15810010015	左肋骨7、8骨折	4	6	建议B超检查	中度
228	2019.1.20	3	女	不详	16:00:00	摔伤	1	13901165827	右手腕骨折	4	3	建议X检查	中度
229	2019.1.21	3	女	35	19:45:00	摔伤	1	18530099538	右手掌挫伤	1	3	建议X检查	轻伤
230	2019.1.22	3	男	18	12:15:00	摔伤	1	17610259711	右肘关节脱位	2	7	建议X检查	轻伤
231	2019.1.23	3	男	8	11:15:00	摔伤	1	18145681798	左大腿肌肉拉伤	3	5	云喷、建议X线检查	轻伤
232	2019.1.23	3	女	10	12:30:00	摔伤	1	13524117235	左小腿挫伤	1	5	云喷、建议X线检查	轻伤
233	2019.1.23	3	男	35	15:12:00	摔伤	1	13501088624	右肘关节脱位	2	7	建议X检查	轻伤
234	2019.1.23	3	女	32	15:40:00	摔伤	1	13516618138	右肩关节韧带拉伤	2	8	建议X检查	轻伤
235	2019.1.24	3	男	11	11:10:00	摔伤	1	13671342890	腰肌扭伤	3	4	喷雾，休息	轻伤
236	2019.1.25	3	男	27	10:25:00	撞伤	2	17611021137	左小腿胫骨下端骨折	4	5	建议X检查	中伤
237	2019.1.25	3	男	12	10:25:00	撞伤	2	18201618006	左侧前臂骨折	4	7	建议X检查	中伤
238	2019.1.25	3	男	28	10:45:00	摔伤	1	15821905776	左耳部外伤	1	9	包扎、清创、消毒、CT	轻伤
239	2019.1.25	3	女	22	11:35:00	摔伤	1	18810220766	右手腕颗粒性骨折	4	3	建议X检查	中伤
240	2019.1.25	3	女	7	12:15:00	撞伤	2	13039270220	左小腿挫伤	1	5	云喷、建议X线检查	轻伤
241	2019.1.25	3	男	35	13:55:00	摔伤	1	15600600180	右肩关节脱位	2	8	建议X检查	轻伤
242	2019.1.26	3	女	30	10:24:00	摔伤	1	13911383811	背部软组织损伤	3	8	建议X检查	轻度
243	2019.1.26	3	男	31	12:30:00	摔伤	1	13466332690	腰肌扭伤	3	4	休息、喷雾	轻度
244	2019.1.26	3	男	21	11:35:00	被撞	2	18846137637	鼻出血	6	9	建议X检查	轻度
245	2019.1.26	3	男	16	12:37:00	摔伤	1	18519691531	左桡骨骨折	4	7	建议X检查	中度
246	2019.1.26	3	女	32	12:45:00	摔伤	1	18600063953	左膝半月板损伤	2	2	建议MRI检查	轻度
247	2019.1.26	3	男	16	13:38:00	摔伤	1	13801384400	右肘关节脱位	2	7	建议X检查	轻度
248	2019.1.26	3	男	34	14:22:00	摔伤	1	15711173288	右肩关节脱位	2	8	建议X检查	轻度
249	2019.1.26	3	男	29	14;35	被撞	2	18806878008	右股骨软组织损伤	3	5	建议X检查	轻度
250	2019.1.26	3	男	32	15:57:00	摔伤	1	17611440031	右侧胸壁软组织挫伤	3	6	建议X检查	轻度
251	2019.1.27	3	男	35	11:15:00	摔伤	1	18611666252	左锁骨骨折	4	6	建议X检查	中度
252	2019.1.27	3	女	30	11;25	摔伤	1	18611530720	左眼皮下血肿	3	9	冷敷、建议眼底检查	轻度
253	2019.1.27	3	男	28	11:50:00	摔伤	1	13524332664	双膝关节腔积液	2	2	冷敷、建议医院治疗	轻度
254	2019.1.27	3	女	36	13:20:00	摔伤	1	13983130035	脑震荡	5	1.1	建议CT检查	轻度
255	2019.1.27	3	男	13	15:57:00	摔伤	1	17749980102	右锁骨骨折	4	6	建议X检查	中度
256	2019.1.27	3	男	27	16:20:00	摔伤	1	13931318692	左膝韧带拉伤	2	2	建议MRI检查	轻伤
257	2019.1.28	3	女	28	13:29:00	摔伤	1	17600265341	左膝部扭伤	2	2	建议X检查	轻伤
258	2019.1.28	3	男	38	13:50:00	摔伤	1	13911870597	右踝扭伤	2	10	建议X检查	轻伤
259	2019.1.28	3	男	11	15:10:00	摔伤	1	15022627775	左上臂外伤疼痛	1	7	建议X检查	轻伤
260	2019.1.29	3	男	13	11:00:00	摔伤	1	18751513421	右臀部皮下血肿	3	4	建议X检查	轻伤
261	2019.1.29	3	男	12	14:50:00	摔伤	1	18978900938	左锁骨骨折	4	6	建议X检查	轻伤
262	2019.1.29	3	男	10	16:50:00	摔伤	1	13332816868	左手腕关节损伤	2	3	建议X检查	轻伤
263	2019.1.29	3	男	44	20:00:00	摔伤	1	13161755233	肩部损伤	2	8	建议X检查	轻伤
264	2019.1.30	3	男	12	11:00:00	摔伤	1	13033086666	左膝韧带拉伤	2	2	建议MRI检查	轻伤
265	2019.1.30	3	男	25	12:00:00	摔伤	1	13261995695	前交叉韧带部分撕裂	2	2	建议MRI检查	中伤
266	2019.1.30	3	男	9	11:15:00	摔伤	1	13611380700	肌肉挫伤	3	11	建议X检查	轻伤
267	2019.1.31	3	男	21	12:00:00	摔伤	1	13603971635	左膝关节扭伤	2	2	建议MRI检查	轻伤
268	2019.1.31	3	女	33	14:15:00	摔伤	1	13761211660	左膝关节扭伤	2	2	建议X检查	轻伤
269	2019.1.31	3	男	24	14:00:00	摔伤	1	15911095004	左腕骨裂	4	3	建议X检查	中伤
270	2019.1.31	3	男	43	19:50:00	摔伤	1	13911550986	左踝扭伤	2	10	云喷、建议X线检查	轻伤
271	2019.2.1	4	女	29	11:00:00	摔伤	1	15933878297	左上腹软组织损伤	3	6	建议B超检查	轻伤
272	2019.2.1	4	男	19	11:20:00	摔伤	1	18210600664	右腕骨折	4	3	云喷、建议X线检查	中度
273	2019.2.1	4	女	28	11:50:00	撞伤	2	13401191256	左前臂骨折	4	7	建议X线检查	中度
274	2019.2.1	4	女	36	13:20:00	撞伤	2	13926511905	右膝韧带拉伤	2	2	云喷、建议X线检查	轻伤
275	2019.2.1	4	女	32	11:25:00	撞伤	2	13381097123	左膝韧带拉伤	2	2	云喷、建议X线检查、休息	轻伤
276	2019.2.1	4	男	20	15:10:00	摔伤	1	15140364687	右膝韧带损伤	2	2	云喷、观察	轻伤
277	2019.2.1	4	女	38	15:20:00	摔伤	1	18610283594	右膝皮下血肿	3	2	云喷、观察	轻伤
278	2019.2.2	4	女	25	19:20:00	摔伤	1	17731343131	左肘部骨裂	4	7	建议X线检查	中度
279	2019.2.2	4	男	10	11:05:00	摔伤	1	15631325251	左前臂肌肉拉伤	3	7	建议X线检查	轻伤
280	2019.2.2	4	女	7	11:30:00	摔伤	1	13910196166	脑挫裂伤	5	1.1	建议CT检查	轻伤
281	2019.2.2	4	女	11	11:35:00	摔伤	1	13501078046	尾椎外伤	1	4	建议X线检查	轻伤
282	2019.2.2	4	女	38	12:30:00	摔伤	1	13826420430	左拇指拉伤	3	3	建议X线检查	轻伤
283	2019.2.3	4	女	33	12:20:00	摔伤	1	15510911691	右膝韧带拉伤	2	2	建议X线检查	轻伤
284	2019.2.6	4	男	45	19:10:00	摔伤	1	15309503061	轻微脑震荡	5	1.1	建议CT检查	轻度
285	2019.2.6	4	女	31	19:50:00	摔伤	1	18600982592	轻微脑震荡	5	1.1	建议CT检查	轻度
286	2019.2.7	4	男	8	09:10:00	摔伤	1	13269938986	右小腿肌肉拉伤	3	5	建议MRI检查	轻度
287	2019.2.7	4	女	14	11:10:00	撞伤	2	13831361452	鼻出血	6	9	清洗、消毒	轻度
288	2019.2.7	4	男	8	12:28:00	被撞	2	13478968888	左膝韧带拉伤	2	2	建议MRI检查	轻度
289	2019.2.7	4	女	10	19:13:00	撞伤	2	13801121025	右拇指外伤	1	3	建议X检查	轻度
290	2019.2.7	4	男	31	19:37:00	摔伤	1	15910307115	右手桡骨骨折	4	7	建议X检查	中度
291	2019.2.7	4	女	28	20;50	摔伤	1	15232130608	左膝韧带拉伤	2	2	建议MRI检查	轻度
292	2019.2.8	4	男	13	10:25:00	摔伤	1	18618345186	左侧胸壁软组织损伤	3	6	云南白药喷雾、建议X检查	轻度
293	2019.2.8	4	男	50	12:00:00	摔伤	1	13716189909	右腕扭伤	2	3	建议X检查、休息	轻度
294	2019.2.8	4	男	51	11:40:00	摔伤	1	13701327881	右膝扭伤	2	2	建议X检查	轻度
295	2019.2.8	4	女	31	12:24:00	摔伤	1	18510905747	左膝韧带拉伤	2	2	建议MRI检查	轻度
296	2019.2.8	4	女	28	13:30:00	摔伤	1	13612823553	右掌肌肉扭伤	3	3	冷敷、喷雾休息	轻度
297	2019.2.8	4	男	29		撞伤	2	18610799998	胸部软组织损伤	3	6	建议MRI检查	轻度
298	2019.2.8	4	男	44	16:50:00	摔伤	1	13609100839	右膝韧带拉伤	2	2	云南白药喷雾、建议X检查	轻度
299	2019.2.8	4	男	30	16:55:00	摔伤	1	17733688777	右肘部韧带拉伤	2	7	建议X检查	轻度
300	2019.2.8	4	女	35	19:00:00	摔伤	1	18611487733	左手腕骨折	4	3	建议X检查	中度
301	2019.2.9	4	女	30	10:55:00	摔伤	1	15604729222	右腕扭伤	2	3	建议X检查	轻度
302	2019.2.9	4	男	49	13:35:00	摔伤	1	13910575009	左肱骨骨折	4	7	建议X检查	中度
303	2019.2.9	4	女	23	14:07:00	摔伤	1	18600020931	腰部肌肉拉伤	3	4	建议CT检查	轻度
304	2019.2.9	4	男	16	14:40:00	摔伤	1	13161558658	右手腕挫伤	1	3	云南白药喷雾、建议X检查	轻度
305	2019.2.9	4	男	37	15:40:00	摔伤	1	15028506321	右膝韧带撕裂	2	2	建议MRI检查	轻度
306	2019.2.9	4	女	40	18:30:00	摔伤	1	18611901260	右膝韧带拉伤	2	2	建议MRI检查	轻度
307	2019.2.10	4	女	10	10:20:00	摔伤	1	15500003085	头部外伤	1	1	建议CT检查	轻度
308	2019.2.10	4	女	40	13:00:00	摔伤	1	13821328818	左膝韧带拉伤	2	2	建议MRI检查	轻度
309	2019.2.10	4	女	32	15:30:00	摔伤	1	18611449395	颈部外伤	1	9	建议X检查	轻度
310	2019.2.10	4	女	42	19:40:00	摔伤	1	15611102201	右膝韧带损伤	2	2	云喷、建议MRI检查	轻度
311	2019.2.10	4	男	34	20:35:00	摔伤	1	15901085807	右腕部关节脱位、扭伤	2	3	建议X检查	轻度
312	2019.2.11	4	男	32	14:40:00	撞伤	2	13901323866	左膝外伤	1	2	缝合、清创	轻度
313	2019.2.11	4	男	28	15:40:00	摔伤	1	15394870930	右大腿软组织损伤	3	5	建议X检查	轻度
314	2019.2.12	4	男	25	13:50:00	撞伤	2	13133000508	右锁骨骨折	4	6	建议X检查	中度
315	2019.2.12	4	女	30	15:33:00	摔伤	1	15810210079	软组织损伤	3	11	建议X检查	轻度
316	2019.2.12	4	女	20	21:00:00	摔伤	1	13120104441	韧带拉伤	2	5	建议MRI检查	轻度
317	2019.2.13	4	女	43	11:00:00	摔伤	1	13141388119	尾椎外伤	1	4	建议X检查	轻度
318	2019.2.13	4	女	43	12:05:00	摔伤	1	15818577027	左膝韧带拉伤	2	2	建议MRI检查	轻度
319	2019.2.13	4	男	22	14:20:00	摔伤	1	13661069136	肋骨骨折、气胸	4	6	建议X检查	中度
320	2019.2.14	4	男	33	11:00:00	摔伤	1	15321130519	唇部外伤	1	9	清洗、消毒	轻度
321	2019.2.14	4	男	41	14:10:00	摔伤	1	13466591517	左锁骨骨折	4	6	建议X检查	中度
322	2019.2.14	4	男	41	15:40:00	摔伤	1	13370140218	肋骨骨折	4	6	建议X检查	中度
323	2019.2.14	4	女	24	15:00:00	摔伤	1	16600242691	左膝韧带拉伤	2	2	建议MRI检查	轻度
324	2019.2.14	4	女	28	16:30:00	被撞	2	18611474734	腰部软组织损伤	3	4	建议B超检查	轻度
325	2019.2.14	4	女	12	20:00:00	摔伤	1	13601124668	软组织损伤	3	11	云喷、建议X线检查	轻度
326	2019.2.15	4			11:55:00	摔伤	1		颅骨骨折	4	1	建议X线、CT检查	中度
327	2019.2.15	4	男	31	14:20:00	摔伤	1	18600915973	左肩胛软组织损伤	3	8	建议X检查	轻度
328	2019.2.15	4	女	5	15:30:00	摔伤	1	15332778345	右小腿软组织损伤	3	5	建议X检查	轻度
329	2019.2.16	4	男	11	11:30:00	摔伤	1	13801160063	左脚外踝扭伤	2	10	建议X检查	轻度
330	2019.2.16	4	男	29	11:40:00	摔伤	1	18810074474	左脚外踝扭伤	2	10	云喷、冰敷	轻度
331	2019.2.16	4	男	43	12:35:00	摔伤	1	13910515561	左手掌骨折	4	3	建议X检查	中度
332	2019.2.16	4	女	38	12:35:00	撞伤	2	13503131919	脑震荡	5	1.1	建议CT检查	轻度
333	2019.2.16	4	女	33	12:57:00	摔伤	1	18946609155	尾椎外伤	1	4	建议X检查	轻度
334	2019.2.16	4	女	33	13:15:00	摔伤	1	13810005219	胸椎骨折	4	6	建议X检查	中度
335	2019.2.16	4	女	27	13:40:00	摔伤	1	18610072122	右小腿肌肉拉伤	3	5	云喷、按摩	轻度
336	2019.2.16	4	女	23	14:55:00	摔伤	1	18513107378	左小腿骨折	4	5	建议X检查	中度
337	2019.2.16	4	女	13	15:03:00	摔伤	1	15810324722	额头血肿	3	1	建议CT检查	轻度
338	2019.2.16	4	女	28	15:56:00	撞伤	2	18210621508	轻微脑震荡	5	1.1	吸氧、建议CT检查	轻度
339	2019.2.16	4	女	32	16:50:00	摔伤	1	18600879455	双膝皮下血肿	3	2	冷敷、喷雾休息	轻度
340	2019.2.17	4	女	32	12:30:00	撞伤	2	15811277609	胸部软组织损伤	3	6	建议X检查	轻度
341	2019.2.17	4	男	9	10:10:00	摔伤	1	13311338986	右肘扭伤	2	7	建议X检查	轻度
342	2019.2.17	4	女	38	13:35:00	摔伤	1	13811396900	韧带撕裂、半月板损伤、积液	2	2	建议MRI检查	中度
343	2019.2.17	4	男	14	14:20:00	摔伤	1	13916783467	唇部外伤	1	9	建议上一级医院处理	轻度
344	2019.2.17	4	女	33	15:40:00	摔伤	1	17778151777	软组织损伤	3	11	建议X检查	轻度
345	2019.2.17	4	男	30	13:30:00	摔伤	1	13911082832	左桡骨远端骨折	4	7	建议X检查	中度
346	2019.2.19	4	女	11	13:50:00	摔伤	1	13311062611	右小腿软组织损伤	3	5	建议X检查	轻度
347	2019.2.20	4	男	12	11:30:00	摔伤	1	13910171606	轻微脑震荡	5	1.1	建议CT检查	轻度
348	2019.2.21	4	女	15	11:10:00	摔伤	1	15683299593	轻微脑震荡	5	1.1	建议CT检查	轻度
349	2019.2.21	4	女	18	12:20:00	摔伤	1	18252711407	软组织损伤	3	11	建议X检查	轻度
350	2019.2.21	4	男	27	12:40:00	摔伤	1	15229737227	左小腿腓骨骨折	4	5	建议X检查	中度
351	2019.2.21	4	男	15	13:50:00	摔伤	1	15117849691	左锁骨骨折	4	6	建议X检查	中度
352	2019.2.21	4	男	10	14:03:00	摔伤	1	18610876113	左肘部骨折	4	7	建议X检查	中度
353	2019.2.21	4	女	11	15:35:00	撞伤	2	18611584632	软组织损伤	3	11	建议X检查	轻度
354	2019.2.22	4	女	12	10:05:00	摔伤	1	13811849863	左肘部软组织损伤	3	7	建议X检查	轻度
355	2019.2.23	4	女	19	10:26:00	摔伤	1	13877249980	左肱骨粉碎性骨折	4	7	建议X检查	中度
356	2019.2.23	4	男	30	11:05:00	撞伤	2	13811664749	软组织损伤	3	11	休息、喷雾	轻度
357	2019.2.23	4	女	35	11:05:00	撞伤	2	15910661583	软组织损伤	3	11	休息、喷雾	轻度
358	2019.2.23	4	女	30	12:10:00	摔伤	1	18611286508	脑震荡	5	1.1	建议CT检查	轻度
359	2019.2.23	4	男	9	12:19:00	摔伤	1	13801197082	后交叉韧带拉伤	2	2	建议MRI检查	轻度
360	2019.2.23	4	女	23	12:20:00	摔伤	1	15243241431	左眼血肿	3	9	建议X检查	轻度
361	2019.2.23	4	女	30	13:00:00	摔伤	1	18810151230	右膝韧带拉伤	2	2	建议MRI检查	轻度
362	2019.2.23	4	女	25	13:50:00	摔伤	1	13810221335	右手扭伤	2	3	建议X检查	轻度
363	2019.2.23	4	女	38	14:10:00	摔伤	1	13671260514	左手腕血肿	3	3	建议X检查	轻度
364	2019.2.23	4	男	37	15:40:00	撞伤	2	13811009680	软组织损伤	3	11	建议X检查	轻度
365	2019.2.23	4	女	33	16:20:00	摔伤	1	15110180831	左前臂骨折	4	7	建议X检查	中度
366	2019.2.23	4	男	27	19:30:00	摔伤	1	18768986561	左肘外伤	1	7	消毒、包扎必要时X线检查	轻度
367	2019.2.23	4	女	27	20:20:00	摔伤	1	18610122075	软组织损伤	3	11	云喷、建议X线检查	轻度
368	2019.2.23	4	男	7	20:55:00	摔伤	1	13932388595	肌肉损伤	3	11	建议X检查	轻度
369	2019.2.24	4	女	49	09:10:00	摔伤	1	13521758340	左膝关节韧带拉伤	2	2	建议MRI检查、冰敷	轻度
370	2019.2.24	4	男	35	11:26:00	摔伤	1	13811766706	左踝扭伤	2	10	建议X检查	轻度
371	2019.2.24	4	女	27	12:00:00	撞伤	2	15116938713	左前臂软组织损伤	3	7	建议X检查	轻度
372	2019.2.24	4	女	29	13:40:00	摔伤	1	13466739897	背部撞伤	3	8	云喷、建议X线检查	轻度
373	2019.2.24	4	女	11	13:40:00	摔伤	1	13811931056	左臂肌肉拉伤	3	7	建议X检查	轻度
374	2019.2.24	4	男	39	16:29:00	摔伤	1	13911569166	左侧肋骨骨裂	4	6	建议X检查	中度
375	2019.2.25	4	女	42	12:30:00	摔伤	1	13601118833	右肩韧带拉伤	2	8	建议X检查	轻度
376	2019.2.25	4	女	40	20:30:00	摔伤	1	18016435459	右腕部骨折	4	3	建议X检查	中度
377	2019.2..27	4	女	16	11:42:00	摔伤	1	13463324683	左膝韧带拉伤	2	2	建议MRI检查	轻度
378	2019..2.27	4	女	23	13:50:00	摔伤	1	15864501274	右腕部骨裂	4	3	建议X检查	中度
379	2019.2.27	4	女	37	18:10:00	摔伤	1	13910611801	右膝韧带拉伤	2	2	建议MRI检查	轻度
380	2019.2.27	4	女	32	18:40:00	扎伤	3	18611157773	左足钉子扎伤	6	10	清创、建议注射TAT	轻度
381	2019.2.27	4	女	36	20:50:00	摔伤	1	18643221133	右肩关节脱位	2	8	建议X检查	轻度
382	2019.2.28	4	女	18	10:50:00	摔伤	1	18333329361	左小腿软组织损伤	3	5	建议X检查	轻度
383	2019.2.28	4	女	17	11:10:00	摔伤	1		双膝软组织损伤	3	2	建议X检查	轻度
384	2.19.2.28	4	女	42	12:10:00	摔伤	1	13911067922	右锁骨骨折	4	6	建议X检查	中度
385	2019.2.28	4	男	41	12:10:00	摔伤	1	13331072001	右膝外伤	1	2	消毒、包扎	轻度
386	2019.2.28	4	女	15	14:05:00	摔伤	1	18252711407	轻微脑震荡	5	1.1	观察、头部CT	轻度
387	2019.2.28	4	男	16	14:30:00	摔伤	1	18903196845	有眼擦伤	1	9	清创、观察	轻度
388	2019.2.28	4	女	13	18:50:00	摔伤	1	18931316696	右肱骨骨折	4	7	建议X检查	中度
389	2019.3.1	5	男	31	15:15:00	摔伤	1	13811159371	左胫腓骨骨折	4	5	建议X线检查	中度
390	2019.3.1	5	男	26	18:10:00	摔伤	1	18610727855	软组织损伤	3	11	建议X线检查	轻度
391	2019.3.1	5	男	26	16:55:00	摔伤	1	18501091106	软组织损伤	3	11	建议X线检查	轻度
392	2019.3.2	5	男	27	10:53:00	摔伤	1	18810196786	左膝韧带拉伤	2	2	休息、喷雾	轻度
393	2019.3.2	5	男	31	11:30:00	摔伤	1	15901292929	右肱骨骨折	4	7	建议X线检查	中度
394	2019.3.2	5	女	36	11:40:00	摔伤	1	18616195373	左膝韧带拉伤	2	2	建议X线检查	轻度
395	2019.3.2	5	男	39	13:40:00	摔伤	1	13811711181	韧带损伤	2	5	建议MRI检查	轻度
396	2019.3.2	5	男	43	14:00:00	摔伤	1	13910881865	韧带损伤	2	5	建议X线检查	轻度
397	2019.3.2	5	男	52	14:30:00	摔伤	1	17797771999	股骨骨折	4	5	建议X线检查	中度
398	2019.3.2	5	男	27	18:50:00	摔伤	1	13641207378	下颌部擦伤、轻微脑震荡	5	1.1	清创、观察、建议CT检查	轻度
399	2019.3.3	5	女	39	11:10:00	摔伤	1	18611689170	双膝韧带拉伤	2	2	云喷、休息	轻度
400	2019.3.3	5	男	35	11:15:00	摔伤	1	18686188835	右腕桡骨骨裂	4	3	建议X线检查	中度
401	2019.3.3	5	男	5	12:30:00	撞伤	2	13811856402	脑震荡	5	1.1	建议CT检查	轻度
402	2019.3.3	5	男	23	09:25:00	摔伤	1	18713301021	胸椎外伤	1	6	建议X线检查	轻度
403	2019.3.3	5	男	9	12:25:00	摔伤	1	18611850301	软组织损伤	3	11	建议X线检查	轻度
404	2019.3.5	5	男	17	09:25:00	摔伤	1	16630405638	唇部裂伤	3	9	建议缝合	轻度
405	2019.3.5	5	男	36	15:26:00	被撞	2	17703710588	牙齿松动	6	9	建议口腔医院治疗	轻度
406	2019.3.7	5	女	17	10:25:00	摔伤	1	18003234577	左锁骨骨折	4	6	建议X线检查	中度
407	2019.3.7	5	男	29	12:05:00	摔伤	1	18610263996	右肩脱臼	2	8	建议X线检查	轻度
408	2019.3.7	5	男	29	12:16:00	摔伤	1	15810099080	左前臂粉碎性骨折	4	7	建议X线检查	中度
409	2019.3.8	5	男	37	21:25:00	摔伤	1	18636867959	左小腿裂伤	3	5	清创、缝合、建议X线	轻度
410	2019.3.9	5	男	37	15:26:00	摔伤	1	13552122233	软组织损伤	3	11	建议X线检查	轻度
411	2019.3.9	5	女	31	12:05:00	摔伤	1	15011036071	脑震荡	5	1.1	建议头部CT	轻度
412	2019.3.10	5	男	36	12:25:00	摔伤	1	18901089959	手指骨裂	4	3	建议X线检查	中度
413	2019.3.10	5	男	33	11:30:00	摔伤	1	15901276714	软组织损伤	3	11	建议X线检查	轻度
414	2019.3.10	5	男	30	12:55:00	摔伤	1	13801098591	脑震荡	5	1.1	建议CT检查	轻度
415	2019.3.13	5	女	29	14:30:00	摔伤	1	18339393000	左踝部骨折	4	10	建议X线检查	中度
416	2019.3.16	5	男	30	13:05:00	摔伤	1	13901292921	脑震荡	5	1.1	观察、休息	轻度
417	2019.3.16	5	男	30	13:05:00	摔伤	1	15801576813	软组织损伤	3	11	建议X线检查	轻度
418	2019.3.16	5	女	33	15:40:00	摔伤	1	18911309013	韧带拉伤	2	5	建议X线检查	轻度
419	2019.3.16	5	女	23	19:40:00	摔伤	1	15601269686	脑出血	5	1.1	建议CT检查	中度
420	2019.3.17	5	男	12	16:20:00	摔伤	1	13520795000	左髋骨骨折	4	4	建议X线检查	中度
421	2019.3.23	5	男	36	11:00:00	摔伤	1	13911777918	左锁骨骨折	4	6	建议X线检查	中度
422	2019.3.23	5	男	26	12:50:00	摔伤	1	15127518618	左肩关节脱位	2	8	建议X线检查	轻度
423	2019.3.23	5	女	39	14:12:00	摔伤	1	13501244817	左桡骨骨折	4	7	建议X线检查	中度
424	2019.3.23	5	男	31	14:12:00	摔伤	1	15301196400	肌肉拉伤	3	11	建议X线检查	轻度
425	2019.3.24	5	男	28	11:30:00	摔伤	1	13810963497	软组织挫伤	3	11	建议X线检查	轻度
426	2019.3.24	5	男	42	11:40:00	摔伤	1	18500556267	左锁骨骨折	4	6	建议X线、B超检查	中度
427	2019.3.24	5	女	44	13:05:00	摔伤	1	13501197983	左膝部韧带拉伤	2	2	建议MRI检查	轻度
428	2019.3.30	5	男	32	14:15:00	摔伤	1	13621306132	左胸肋骨骨折	4	6	建议X检查	中度
429	2019.3.30	5	男	25	15:45:00	摔伤	1	18519201305	背部挫伤	3	8	建议X检查	轻度
430	2019.3.30	5	男	34	16:20:00	摔伤	1	13819552338	尺骨粉碎性骨折	4	7	建议X检查	中度
431	2019.3.31	5	女	29	10:45:00	撞伤	2	18611472207	软组织损伤	3	11	建议X检查	轻度
432	2019.3.31	5	男	39	14:20:00	摔伤	1	13911733388	软组织损伤	3	11	建议X检查	轻度

## Sheet: 万龙2018-2019雪季记录
日期	月份编号	编号	性别	年龄	受伤时间	受伤时间分类（1，8：00-11：00；2，11：00-14：00；14：00-17：00）	受伤部位	受伤部位受伤部位（1-头部（脑部：1.1）；2-膝关节；3-手腕手指；4-腰臀；5-下肢；6-胸肋腹；7-上肢；8-肩背；9-面颈部；10-脚踝，脚趾；11-软组织）	受伤地点	受伤地点（1-初级道；2-中级道；3-高级道；4-连接交汇处；5-其他（野雪，大厅等））	受伤原因	受伤原因（1-摔伤，1.1 速度快，1.2 经验不足，1.3 失去平衡，1.4 躲避，1.5 卡雪等，1.6 其他；2-撞伤，2.1 与他人相撞，2.2 自己撞伤；3-其他）	学龄	学龄（1：2年及以下；2：2-5年；3：5-10年；4：10年以上）	滑雪器材	诊断和救治过程
2018-11-01	11	1	男	23			右髌骨错位	2	金龙道中段	3	自摔	1	5年	2	双板
2018-11-01	11	2	女	31	09:50:00	1	轻微脑出血	1.1	金龙道底	3	被撞	2.1	3年	2	双板	清创，送医院
2018-11-02	11	3	女	31	10:50:00	1	左脚扭伤	10	金龙道上段	3	自摔	1	3年	2	单板	云南白药气雾剂
2018-11-03	11	4	男	41	11:00:00	2	腰部	4	小龙道下段	2	自摔	1	1年	1	双板	建议拍片
2018-11-03	11	5	男	30	10:40:00	1	右手腕骨折	3	云龙道下段	3	自摔	1	1年	1	单板	云南白药气雾剂
2018-11-03	11	6	男	21	13:35:00	2	腰部	4	金龙道中段	3	自摔	1	初学	1	单板
2018-11-03	11	7	男	30	14:30:00	3	左腿外伤	5	金龙道中段	3	自摔	1	2年	1	双板	去医院缝合
2018-11-03	11	8	男	38	14:50:00	3	左肘关节	7	金龙道下段	3	自摔	1	2年	1	单板	建议拍片
2018-12-22	12	212	女	12	10:50:00	1	头部	1	中级道（大奔头底）	2	撞人	2.1	4年	2	单板
2018-11-03	11	10	女	29	14:20:00	3	左膝盖	2	金龙道下段	3	被撞	2.1	2年	1	双板	冰敷
2018-11-03	11	11	女	52	13:40:00	2	左大腿	5	金龙道下段	3	被撞	2.1	初学	1	双板	送医院
2018-11-03	11	12	男	27					金龙道下段	3	撞人	2.1	初学	1	双板
2018-11-03	11	13	男	34	12:00:00	2			小龙道下段	2	撞人	2.1	0		单板
2018-11-04	11	14	女	30	10:30:00	1	右肩胛骨	8	金龙道中段	3	被撞	2.1	2年	1	单板	建议拍片
2018-11-04	11	15	女	53	10:30:00	1	右膝盖	2	金龙道中段	3	被撞	2.1	5年	2	双板	冰敷
2018-11-04	11	16	男	41	10:35:00	1	右跨	5	金龙道上段	3	相撞	2.1	4年	2	单板
2018-11-04	11	17	女	30	10:35:00	1	右腿上部	5	金龙道上段	3	相撞	2.1	6年	3	双板
2018-11-04	11	18	男	35							撞人	2.1			单板
2018-11-06	11	19	女	33	11:00:00	2	右膝内侧	2	金龙道中段	3	自摔	1	3年	2	双板
2018-11-07	11	20	女	28			右臂	7	银龙道	3	自摔	1	1年	1	单板
2018-11-07	11	21	女	24	10:00:00	1	右大腿骨折	5	银龙道中段	3	自摔（速度快，没网摔进树林）	1.1	1年	1	双板	送医院
2018-11-09	11	22	男	37	11:10:00	2	右眼、双小腿	5	金龙道下段	3	被撞	2.1	2年	1	单板
2018-11-09	11	23	男	21	11:10:00	2			金龙道下段	3	撞人	2.1	2年	1	单板
2018-11-09	11	24	女	31	11:20:00	2	左手腕骨折	3	中级道下段	2	自摔（为了躲人）	1.4	5年	2	单板	绷带固定
2018-11-09	11	25	男	32	11:10:00	2	右锁骨骨折	6	中级道下段	2	自摔（被雪包绊倒）	1.6	10年	3	双板	绷带固定
2018-11-10	11	26	男	34	16:20:00	3	鼻骨骨折	9	酷龙道头	2	自摔（速度快、没控制住）	1.1	初学	1	双板	清创
2018-11-10	11	27	男	24	11:18:00	2	肋骨	6	初级道	1	自摔（初学、控制不好）	1.2	初学	1	单板
2018-11-10	11	28	男	31	14:00:00	3	头、劲、右臂	1，7	金龙与玉龙交接处	2	被撞	2.1	2年	1	单板
2018-12-30	12	250	男	8	12:30:00	2	头部	1	云龙道下段	3	自摔（速度快撞网上）	1.1	1年	1	双板
2018-11-10	11	30	男	30	11:30:00	2					撞人	2.1
2018-11-11	11	31	男	28	10:50:00	1	尾椎骨	4	初级道中段	1	自摔	1	初学	1	双板
2018-11-11	11	32	男	25	10:10:00	1	右手背	3	银龙下段	3	自摔	1	2年	1	单板
2018-11-11	11	33	男	35	11:20:00	2	尾椎骨	4	雪具大厅门口	5	自摔	1	初学	1	单板
2018-11-11	11	34	男	32	08:30:00	1	腰部	4	中级道下段	2	撞人（速度快刹不住）	2.1	1年	1	双板
2018-11-11	11	35	男	36	09:45:00	1	左膝	2	银龙道底	3	与朋友相撞雪板没脱落扭伤	2.1	2年	1	双板
2018-11-11	11	36	男	27	09:20:00	1	右膝	2	玉龙道中段	2	自摔（速度快没刹住、扭伤）	1.1	3年	2	双板
2018-11-11	11	37	男	26	10:46:00	1	右大腿外侧	5	玉龙道与金龙道交接下100米处	2	相撞	2.1	7年	3	双板
2018-11-11	11	38	男	47	10:46:00	1	头部	1	玉龙道与金龙道交接下101米处	2	相撞	2.1	11年	4	双板
2018-11-12	11	39	女	27	11:40:00	2	腰部	4	二索平台	5	自摔（没控制好）	1.3	初学	1	单板
2018-11-13	11	40	女	45	11:39:00	2	左手腕	3	玉龙、金龙链接处上200米	2	自摔（为了躲人向后倒手扶地）	1.4	2年	1	单板	绷带固定
2018-11-13	11	41	女	31	11:50:00	2			银龙中段	3	相撞	2.1	4年	2	双板
2018-11-13	11	42	女	42	11:50:00	2	左膝	2	玉龙与金龙交叉口上面	2	自摔（雪板别在一起扭伤）	1.5	10年	3	双板
2018-11-13	11	43	女	28	11:50:00	2	左手腕、右大腿	3，5	银龙中段	3	相撞	2.1	6年	3	双板
2018-11-13	11	44	男	60	12:10:00	2	左肩脱臼	8	中级道底	2	自摔	1			双板	绷带固定
2018-11-13	11	45	女	31	12:00:00	2	头部、失忆	1	云龙道	3	自摔	1			单板
2018-11-16	11	46	男	24	16:30:00	3	头部、失忆	1	玉龙道	2	自摔	1	1年	1	单板
2018-11-16	11	47	男	35	10:10:00	1	头部	1	银龙道头	2	自摔	1	5年	2	单板
2018-11-16	11	48	男	32	10:00:00	1	左膝	2	三索旁边雪道	3	自摔（雪道边有石头被绊倒）	1.6	9年	3	双板	冰敷、云南白药气雾剂
2018-11-17	11	49	男	20	13:10:00	2	右手腕	3	长龙道与云顶交汇处	4	自摔（速度快没控制住）	1.1	初学	1	单板	夹板固定
2018-11-17	11	50	女	25	11:30:00	2	左手腕	3	中级道底	2	自摔（为了躲人）	1.4	初学	1	单板	冰敷
2018-11-17	11	51	男	26	12:00:00	2	右肩	8	金龙下段	3	自摔（被雪包绊倒）	1.6	初学	1	双板
2018-11-17	11	52	女	35	11:30:00	2	左膝	2	金龙下段	3	被撞	2.1	2年	1	双板	冰敷
2018-11-17	11	53	男	28	11:30:00	2					撞人	2.1	2年	1	单板
2018-11-17	11	54	女	29	11:30:00	2	左手腕	3	蛟龙下段	3	自摔	1	5年	2	单板	冰敷
2018-11-17	11	55	男	29	12:00:00	2	左肩骨裂	8	金龙中段	3	自摔	1	4年	2	单板
2018-11-17	11	56	男	36	11:00:00	2	右膝	2	金龙下段	3	相撞	2.1	5年	2	双板	冰敷
2018-11-17	11	57	女	33	15:35:00	3	头部、肋骨	1，6	金龙下段	3	被撞	2.1	4年	2	单板
2018-11-17	11	58	男	28	16:00:00	3	右手腕	3	银龙上段	2			4年	2	单板
2018-11-17	11	59	男	44	14:30:00	3	左膝	2	中级道底	2	自摔（被雪包绊倒）	1.6	8年	3	双板	送医院
2018-11-17	11	60	男	33	16:00:00	3	右肘	7	银龙上段	2			12年	4	双板
2018-12-31	12	265	男	8	13:00:00	2	头部	1	中级道（炫龙道对面）	2	被撞	2.1	1年	1	单板
2018-11-18	11	62	女	30	14:05:00	3	腰、尾椎骨	4	长龙道与云顶交汇处	4	自摔	1	1年	1	单板
2018-11-18	11	63	女	29	10:00:00	1	左肩	8	银龙道	3	自摔（不了解雪道）	1.2	2年	1	单板
2018-11-18	11	64	女	31	12:00:00	2	肋骨骨折	6	长龙道中段	1	自摔（速度快）	1.1	3年	2	双板
2018-11-18	11	65	男	39	14:40:00	3	腰	4	金龙上段	3	作动作扭伤	3	5年	2	双板
2018-11-18	11	66	女	34	10:50:00	1	左膝	2	腾龙道中段	3	被撞	2.1	10年	3	双板
2018-11-20	11	67	男	15			左手腕	3	长龙道中段	1	自摔	1	1年	1	单板
2018-11-20	11	68	男	26	12:00:00	2	左手	3	长龙道中段	1	自摔（卡板）	1.5	2年	1	单板
2018-11-20	11	69	女	43	15:30:00	3	右肩、头部	1，8	中级道底	2	被撞	2.1	10年+	4	双板
2018-11-20	11	70	女	21	15:30:00	3			中级道底	2	撞人	2.1	教练		双板
2018-11-23	11	71	女	60	09:20:00	1	右大臂	7	腾龙道下段	3	自摔（为了躲单板）	1.4	4年	2	双板
2018-11-24	11	72	男	24	12:54:00	2	右膝髌骨粉碎性骨折	2	长龙道入口	1	自摔（速度快、没控制住）	1.1	初学	1	单板	送医院
2018-11-24	11	73	男	43	15:40:00	3	左膝	2	长龙道	1	自摔（转弯、没控制好）	1.3	初学	1	双板
2018-11-24	11	74	女	26	15:00:00	3	左膝	2	玉龙道	2	自摔（板卡雪了）	1.5	1年	1	单板
2018-11-24	11	75	男	50	15:30:00	3	右手	3	中级道中段	2	被撞	2.1	10年	3	双板
2019-01-06	1	290	女	12	11:50:00	2	头	1	中级道（大奔头对面）	2	相撞	2.1	3年	2	双板
2019-01-06	1	293	男	6	09:20:00	1	头	1	中级道（大奔头对面）	2	被撞	2.1			双板
2018-11-25	11	78	女	26	15:00:00	3	左脚	10	玉龙道上段	2	自摔（速度快）	1.1	2年	1	双板
2018-11-25	11	79	男	32	16:25:00	3	左膝	2	中级道中段	2	自摔（速度快）	1.1	1年	1	单板
2018-11-25	11	80	女	36	15:10:00	3	头、后背	1	金龙玉龙交叉口上	2	相撞	2.1	初学	1	双板
2018-11-25	11	81		28	11:40:00	2	左肩、右胸	6，8	腾龙道	3	被撞	2.1	1年	1	单板
2018-11-25	11	82	男	35	10:29:00	1			金龙道底	3	相撞	2.1	2年	1	单板
2018-11-25	11	83	女	28			左手腕骨折	3	中级道底	2	自摔（为了躲人）	1.4	3年	2	单板
2018-11-25	11	84	女	37	15:45:00	3	腰左侧	4	游龙道第一弯	2	被撞	2.1	4年	2	单板
2018-11-25	11	85	男	40	15:10:00	3	左肩	8	金龙玉龙交叉口上	2	相撞	2.1	3年	2	单板
2018-11-25	11	86	男	44	11:00:00	2	头、左小腿	1	中级道底	2	被撞	2.1	5年	2	双板
2018-11-25	11	87	男	24	10:29:00	1	腰	4	金龙道底	3	相撞	2.1	5年	2	单板
2018-11-25	11	88	男	40	10:45:00	1	右肩	8	中级道底	2	自摔（卡雪了）	1.5	10年	3	单板
2018-11-25	11	89	男	48	11:40:00	2	左臂	7	游龙道	2	自摔	1	12年	4	双板
2018-11-25	11	90	男	33							撞人	2.1			单板
2018-11-26	11	91	男	59	14:10:00	3	左膝	2	通滑道	5	自摔	1	1年	1	双板
2018-11-26	11	92	女	26	13:45:00	2	右手大拇指	3	刚下缆车	5	自摔	1	初学	1	单板
2018-11-26	11	93	男	49	13:00:00	2	左锁骨	6	飞龙道中段	2	自摔（被雪包绊倒）	1.6	4年	2	单板
2018-11-27	11	94	男	36	09:30:00	1	头部	1	腾龙道	3	自摔	1	1年	1	单板
2018-11-27	11	95	男	57	11:00:00	2	左腿骨折	5	长龙道上段	1	被撞	2.1	20年	4	双板
2018-11-28	11	96	男	37	12:45:00	2	右膝	2	长龙道	1	自摔（跪地）	1.2	2年	1	单板
2018-11-28	11	97	男	35	09:40:00	1	左脚踝	10	二索平台下	5	被撞	2.1	1年	1	双板
2018-11-28	11	98	女		15:00:00	3	左膝	2	中级道	2	被撞	2.1	3年	2	双板
2018-11-29	12	99	女	33			右臂骨折	7	云顶雪道	3	自摔	1	2年	1	单板
2018-11-29	12	100	男	20	16:00:00	3	右手腕	3	中级道底	2	被撞	2.1	1年	1	单板
2018-11-29	12	101	男	38	14:00:00	3	右胸口	6	游龙道中段	2	自摔（速度快，转弯没转好）	1.1	5年	2	双板
2018-11-30	11	102	男	27	14:50:00	3	左锁骨骨折	6	海龙道下段	3	自摔	1	3年	2	双板
2018-11-30	12	103	男	31	15:00:00	3	右膝韧带断裂	2	长龙道上段	1	自摔	1	8年	3	双板
2018-11-30	11	104	女	30			牙齿掉了	9	中级道	2	被撞	2.1			单板
2018-12-01	12	105	男	28	16:40:00	3	左小腿外伤	5	长龙道	1	自摔	1	初学	1	双板
2018-12-01	12	106	男	29	15:20:00	3	右肩骨折	8	玉龙道中段	2	自摔（速度快）	1.1	1年	1	双板
2018-12-01	12	107	男	25	15:10:00	3	右脚踝	10	游龙道	2	自摔（滑错道）	1.2	1年	1	双板
2018-12-01	12	108	男	30	15:30:00	3	左膝	2	玉龙道中段	2	自摔（为了躲人）	1.4	2年	1	单板
2018-12-01	12	109	男	39	15:25:00	3	左膝外伤	2	大奔头底	3	自摔（为了躲人）	1.4	2年	1	双板
2018-12-01	12	110	男	30	11:30:00	2	右小腿外伤	5	玉龙道下段	2	被撞	2.1	2年	1	单板
2018-12-01	12	111	男	35	12:15:00	2	左手腕骨折	3	玉龙道上段	2	自摔（速度快）	1.1	3年	2	单板
2018-12-01	12	112	女	36	11:25:00	2	头部	1	长龙道上段	1	自摔（失控，头向后仰撞地）	1.3	3年	2	单板
2018-12-01	12	113	男	28	14:00:00	3	右锁骨	6	中级道中段	2	自摔（玩花样）	1.6	4年	2	单板
2018-12-01	12	114	男	28							撞人	2.1	3年	2	双板
2018-12-01	12	115	女	43	11:00:00	2	左膝	2	腾龙道底	3	自摔（自己绊倒）	1.6	10多年	4	双板
2018-12-01	12	116	男	36	15:29:00	3	右膝	2	玉龙道下段	2	被撞	2.1	15年	4	双板
2018-12-01	12	117	男	40	15:30:00	3	左肩	8	银龙道	3	被撞	2.1	15年	4	双板
2018-12-01	12	118	男	20	10:40:00	1	右腹部	6	大奔头中段	3	自摔（撞板上）	2.2	11年	4	双板
2018-12-01	12	119	男				锁骨骨折	6	玉龙道	2	自摔	1			双板
2018-12-02	12	120	男	30	11:50:00	2	腰	4	玉龙道	2	自摔	1	1年	1	双板
2018-12-02	12	121	男	44	08:30:00	1	右肋	6	中级道底	2	自摔	1	2年	1	单板
2018-12-02	12	122	女	39	08:30:00	1	左肩	8	银龙	3	自摔	1	1年	1	单板
2018-12-02	12	123	男	46	14:20:00	3	左手腕	3	长龙道底	1	自摔（速度快撞网上）	1.1	2年	1	双板
2018-12-02	12	124	女	30	09:00:00	1	右上臂	7	游龙道下段	2	自摔（速度快撞网上）	1.1	2年	1	双板
2018-12-02	12	125	男	45	11:00:00	2	左脚踝	10	银龙上段	2	被撞	2.1	1年	1	单板
2018-12-02	12	126	女	29	10:00:00	1	尾椎骨	4	玉龙道	2	自摔	1	3年	2	单板
2018-12-02	12	127	男	39	10:10:00	1	左脚踝	10	长龙道中段	1	自摔（失去平衡）	1.3	5年	2	双板
2018-12-02	12	128	男	29	09:46:00	1	右脚踝	10	金龙中上段	3	自摔（为了躲人）	1.4	3年	2	双板
2019-02-01	2	440	女	12	11:00:00	2	头	1	小龙道	2	自摔	1	2年	1
2018-12-03	12	130	男	51	11:30:00	2	右膝	2	中级道下段	2	自摔	1	3年	2	双板
2018-12-04	12	131	男	31	13:30:00	2	左肩	8	银龙道	3	自摔	1	2年	1	单板
2018-12-04	12	132	女	37	14:20:00	3	左小腿骨折	5	腾龙中段	3	自摔（滑累了）	1.2	2年	1	双板
2018-12-04	12	133	男	55	10:40:00	1	左手腕	3	海龙道	3	自摔	1	10多年	4	双板
2018-12-05	12	134	女	52	09:00:00	1	左小腿骨折	5	海龙道下段	3	自摔（转弯没转好）	1.6	1年	1	双板
2018-12-05	12	135	女	29	14:30:00	3	左肋	6	长龙道上段	1	被撞	2.1	初学	1	单板
2018-12-05	12	136	男	30	12:01:00	2	左小臂骨折	7	中级道下段	2	撞人	2.1	2年	1	双板
2018-12-05	12	137	女	32	12:01:00	2	三根肋骨骨折	6	中级道下段	2	被撞	2.1	3年	2	单板
2018-12-06	12	138	男	19	11:35:00	2	右肘脱臼	7	海龙道中段	3	自摔	1	2年	1	单板
2018-12-06	12	139	男	25	15:30:00	3			中级道下段	2	相撞	2.1	1年	1	双板
2018-12-06	12	140	男	54					中级道下段	2	相撞	2.1	3年	2	双板
2018-12-06	12	141	男	48	10:20:00	1	左手	3	中级道	2	自摔	1	10年	3	单板
2018-12-07	12	142	男	35	14:30:00	3	轻微脑出血	1.1	玉龙道与中华龙交汇处	4	自摔	1	初学	1	双板
2018-12-07	12	143	男	26	14:30:00	3	右锁骨骨折	6	长龙道	1	自摔（失控，撞网）	1.3	2年	1	双板
2018-12-07	12	144	女	48	12:00:00	2	右膝	2	游龙道	2	自摔（有冰）	1	3年	2	双板
2018-12-08	12	145	男	38	11:00:00	2	头部	1	长龙道	1	自摔	1	初学	1	单板
2018-12-08	12	146	男	26	15:00:00	3	右肘部	7	长龙道	1	自摔	1	初学	1	单板
2019-02-07	2	473	男	10	14:30:00	3	头	1	海龙道	3	自摔	1	5年	2	双板
2018-12-08	12	148	男	22	12:37:00	2	腰	4	金龙下段	3	被雪板砸伤	3	4年	2	单板
2018-12-08	12	149	女	39	14:58:00	3	左脚踝	10	长龙道上段	1	自摔	1	8年	3	双板
2018-12-09	12	150	男	46	14:00:00	3	左手腕	3	玉龙道	2	自摔	1	2年	1	单板
2018-12-09	12	151	女	32	12:20:00	2	耻骨骨折	4	海龙道下段	3	自摔（换刃换早了）	1.5	1年	1	单板
2018-12-09	12	152	男	30	11:17:00	2	头部	1	中级道下段	2	被撞	2.1	初学	1	单板
2018-12-09	12	153	女	35	13:30:00	2	左膝	2	长龙道	1	自摔	1	3年	2	单板
2018-12-09	12	154	女	22	13:00:00	2	右手掌骨折	3	玉龙道	2	自摔	1	3年	2	单板
2019-02-21	2	549	男	11	10:20:00	1	头部	1	长龙道	1	自摔	1	初学	1	双板
2018-12-09	12	156	男	30	11:30:00	2			腾龙下段	3	撞人	2.1	4年	2	双板
2018-12-09	12	157	男	51			头部	1	腾龙下段	3	被撞	2.1	10多年	4	双板
2018-12-09	12	158	男	53	12:10:00	2	左锁骨骨折	6	银龙道中段	3	相撞	2.1	10多年	4	双板
2018-12-11	12	159	男	22	11:00:00	2	左膝	2	腾龙道	3	撞人	2.1	1年	1	双板
2018-12-11	12	160	男	42	12:11:00	2	左腿	5	银龙道	3	自摔	1	3年	2	双板
2018-12-11	12	161	男	36	11:00:00	2	腰	4	腾龙道	3	被撞	2.1	5年	2	单板
2018-12-12	12	162	女	19	11:25:00	2	左小腿骨折	5	长龙道与短龙交汇处下方	4	自摔（速度快、失控撞网上）	1.1	初学	1	双板
2018-12-12	12	163	女	27	11:25:00	2	左肩脱臼	8	腾龙道中段	3	自摔（速度快、向前摔）	1.1	4年	2	单板
2018-12-12	12	164	男	22	10:40:00	1	腰4横突骨折	4	腾龙道底	3	自摔（速度快。失控）	1.1			双板
2018-12-13	12	165	男	45	13:30:00	2	右脚踝	10	中级道下段	2	自摔	1	5年	2	双板
2018-12-13	12	166	男	41	13:30:00	2	右手腕	3	云顶雪道	3	自摔	1	4年	2	单板
2018-12-14	12	167	男	28	13:10:00	2	左肘	7	长龙道上段	1	自摔	1	初学	1	单板
2018-12-14	12	168	女	40	16:50:00	3	左膝	2	腾龙与银龙连接处	4	自摔	1	初学	1	双板
2018-12-14	12	169	男	47	14:50:00	3	右膝	2	长龙与短龙交汇处上方	4	自摔（没控制好平衡）	1.3	初学	1	双板
2018-12-14	12	170	女	27	11:30:00	2	左膝	2	大奔头下段	3	撞人	2.1	3年	2	双板
2018-12-14	12	171	男	62	10:35:00	1	左腿腓骨、右手掌骨骨折	3，5	海龙道下段（减速网处）	3	自摔（没控制好平衡，有冰）	1.3	15年	4	双板
2018-12-14	12	172	男	50	12:25:00	2	右脚踝	10	银龙道4索站房旁	5	自摔（雪道上有雪包，卡雪 ）	1.5			双板
2018-12-15	12	173	女	27	16:00:00	3	左膝	2	卧龙道天桥下方	1	自摔	1	2年	1	单板
2018-12-15	12	174	男	23	14:40:00	3	左膝	2	游龙道中段	2	自摔（为了躲人）	1.4	1年	1	双板
2018-12-15	12	175	女	24	15:00:00	3	左大腿	5	长龙与短龙交汇处下方	4	自摔（雪卡刃)	1.5	2年	1	单板
2018-12-15	12	176	男	22	12:57:00	2	左上臂骨折	7	炫龙道与中级道交汇处上方	4	自摔（速度快）	1.1	3年	2	单板
2018-12-15	12	177	女	37	11:10:00	2	左上臂骨裂	7	玉龙与金龙交汇处下方	4	自摔（没控制好平衡）	1.3	5年	2	单板
2018-12-15	12	178	男	28	15:10:00	3	左手腕	3	娇龙道	1	自摔（雪卡刃)	1.5	5年	2	单板
2018-12-15	12	179	男	36	09:55:00	1	右脚踝	10	银龙道中段	3	自摔（换刃时摔的）	1.5	6年	3	单板
2018-12-15	12	180	男				胸	6	小龙道	2	自摔	1
2018-12-15	12	181	男	21			左膝韧带断裂	2	中级道	2	自摔	1			双板
2018-12-16	12	182	女	22	13:50:00	2	左肩脱臼	8	游龙道单板公园	2	自摔（从道具上摔下）	1.2	1年	1	单板
2018-12-16	12	183	女	27	13:30:00	2	右手腕	3	银龙道四索上站旁	3	自摔（新手）	1.2	初学	1	单板
2018-12-16	12	184	女	28	11:00:00	2	右手腕	3	长龙道上段	1	自摔（卡雪了）	1.5	2年	1	单板
2018-12-16	12	185	女	41	11:30:00	2	头部	1	中级道上段	2	相撞	2.1	2年	1	双板
2018-12-24	12	221	女	10	15:00:00	3	左膝	2	云龙道中下段	3	自摔	1	3年	2	双板
2018-12-16	12	187	男	56	11:00:00	2	无		中级道上段	2	相撞	2.1	4年	2	双板
2018-12-17	12	188	男	41	11:20:00	2	右膝	2	长龙道	1	自摔	1	初学	1	双板
2018-12-17	12	189	男	41	12:37:00	2	左肩	8	长龙与通滑道分叉下方100米	1	自摔（速度快、失控）	1.1	初学	1	单板
2018-12-17	12	190	男	57	12:30:00	2	右脚踝	10	玉龙与金龙交汇处	4	自摔	1	5年	2	单板
2018-12-17	12	191	女	50	09:50:00	1	左眼	9	中级道	2	自摔（梨式前板搭在一起)	1.5	3年	2	双板
2018-12-18	12	192	女	23	14:07:00	3	肋骨	6	金龙道（交汇口上方）	4	自摔（没控制好平衡）	1.3	2年	1	单板
2018-12-19	12	193	男	23	12:00:00	2	左膝、右肋	2，6	玉龙道（交汇口上方）	4	自摔	1	3年	2	单板
2018-12-19	12	194	男	22	10:00:00	1	右膝	2	大奔头底	3	自摔	1	教练		双板
2018-12-20	12	195	女	42	09:26:00	1	右膝	2	游龙道上段	2	自摔（速度快转弯时撞网）	1.1	2年	1	双板
2018-12-20	12	196	男	20	16:00:00	3	下颌	9	金龙道（交汇口上方）	4	相撞	2.1	1年	1	双板
2018-12-20	12	197	男	53	08:48:00	1	右膝	2	金龙道上段	3	自摔	1	6年	3	双板
2018-12-20	12	198	女	26	16:00:00	3	右腿	5	玉龙中上段	2	被撞	2.1			双板
2018-12-20	12	199	女				右小腿	5	金龙道（交汇口上方）	4	相撞	2.1			双板
2018-12-21	12	200	男	58	15:00:00	3	左肋	6	玉龙	2	自摔	1	2年	1	双板
2018-12-21	12	201	女	23	11:40:00	2	左肩	8	银龙	3	自摔	1	初学	1	单板
2018-12-21	12	202	男	45	11:00:00	2	右手大拇指	3	云龙道	3	自摔	1	5年	2	双板
2018-12-21	12	203	女	32	12:30:00	2	右腿、右臂	5，7	玉龙道	2	被撞	2.1	4年	2	单板
2018-12-21	12	204	男	30					玉龙道	2	撞人	2.1	7年	3	双板
2018-12-22	12	205	女	20	09:30:00	1	头部	1	初级道底	1	自摔（不会滑转弯时摔倒）	1.2	初学	1	双板
2018-12-22	12	206	女	42	13:00:00	2	右脚踝	10	雪圈道	5	自摔（不会滑撞网）	1.2	初学	1	双板
2018-12-22	12	207	男	26	09:00:00	1	右肩、锁骨	8	猛龙道中段	3	自摔（卡刃）	1.5	1年	1	单板
2018-12-22	12	208	男	20	15:00:00	3	肚子	6	中级道（炫龙对面）	2	相撞	2.1	2年	1	单板
2018-12-22	12	209	男	49	09:30:00	1	心脏	6	长龙入口	1	没摔	3	初学	1	双板
2018-12-22	12	210	男	13	14:00:00	3	左肩脱臼	8	游龙道	2	自摔	1	3年	2	双板
2018-12-22	12	211	女	27	09:20:00	1	颈骨	9	威龙下段	3	自摔（卡刃）	1.5	3年	2	单板
2019-02-01	2	442	男	12	11:10:00	2	右膝	2	海龙道	3	被撞	2.1	4年	2	单板
2018-12-22	12	213	女	30	10:50:00	1	左膝	2	中级道（大奔头底）	2	被撞	2.1	3年	2	单板
2018-12-22	12	214	女	18	09:40:00	1	小腿	5	金龙道下段	3	相撞	2.1	3年	2	双板
2018-12-22	12	215	女	29			左小腿	5	金龙道下段	3	相撞	2.1	3年	2	单板
2018-12-22	12	216	男	32	15:00:00	3	左肩脱臼	8	中级道（炫龙对面）	2	相撞	2.1	12年	4	双板
2018-12-23	12	217	男	24	12:20:00	2	右肩脱臼	8	中级道（炫龙对面）	2	自摔（速度快、躲人0	1.1	2年	1	单板
2018-12-23	12	218	男	39	17:00:00	3	左脚	10	大奔头下段	3	自摔（掉进网里	1.2	3年	2	双板
2018-12-24	12	219	女	21	16:00:00	3	左膝	2	长龙道	1	自摔	1	初学	1	双板
2018-12-24	12	220	男	32	15:20:00	3	脸	9	游龙道第一个弯	2	自摔	1	2年	1	单板
2019-03-16	3	667	男	11	15:30:00	3	右膝	2	绿龙道	3	自摔	1	4年	2	双板
2018-12-25	12	222	女		16:30:00	3	左手腕	3	单板练习道	5	自摔	1	初学	1	单板
2018-12-25	12	223	男	16	10:35:00	1	左肋	6	玉龙道	2	自摔	1	3年	2	单板
2018-12-25	12	224	男	36	15:40:00	3	左肩脱臼	8	金龙入口处	3	自摔（有雪包手里拿着东西）	1.6	7年	3	单板
2018-12-25	12	225	男	59	10:00:00	1	右大腿外侧	5	飞龙道底	2	自摔	1	20年	4	双板
2018-12-25	12	226	女	44	11:40:00	2	右手腕	3	长龙道	1	自摔（速度快）	1.1	10多年	4	单板
2018-12-26	12	227	女	19	14:10:00	3	左手腕	3	娇龙道五索上方	1	自摔	1	初学	1	双板
2018-12-26	12	228	男	28	14:30:00	3	肋骨	6	游龙道	2	自摔	1	1年	1	单板
2018-12-26	12	229	男	19	11:40:00	2	左手腕	3	长龙与玉龙交汇口下方	4	自摔（雪道上有坑卡刃）	1.5	初学	1	单板
2018-12-26	12	230	男	21	14:10:00	3	肚子	6	中级道（大奔头对面）	2	相撞	2.1	1年	1	单板
2018-12-26	12	231	男	53	15:05:00	3	肋骨	6	腾龙底	3	自摔	1	10年	3	双板
2018-12-27	12	232	女	25	11:50:00	2	左膝内侧	2	玉龙道底	2	自摔	1	1年	1	单板
2018-12-27	12	233	男	18	10:50:00	1	右锁骨骨裂	6	雪龙道下方连接道	4	自摔（有坑）	1.6	4年年	2	单板
2018-12-27	12	234	女	28			鼻骨、肋骨骨折肺部出血	6，9	海龙道	3	自摔	1	8年	3	双板
2018-12-28	12	235	女		11:30:00	2	膝盖韧带	2	通滑道	3	自摔	1	初学	1	双板
2018-12-28	12	236	男	29	14:20:00	3	右肩脱臼	8	长龙道中段	1	自摔（不会滑）	1.2	初学	1	双板
2018-12-28	12	237	女	48	15:20:00	3	头部	1	长龙道中上段	1	被撞	2.1	初学	1	双板
2018-12-28	12	238	男	22	15:20:00	3	右小腿	5	长龙道中上段	1	撞人	2.1	初学	1	双板
2018-12-28	12	239	男	18	14:20:00	3	左膝	2	玉龙中段	2	自摔	1	5年	2	双板
2018-12-28	12	240	男	59	15:50:00	3	右股骨颈粗隆间骨折	5	玉龙道中段	2	自摔	1	8年	3	双板
2018-12-29	12	241	男	27	10:19:00	1	右脚踝	10	中级道下段	2	自摔（前面人突然停下）	1.4	1年	1	单板
2018-12-29	12	242	男	44	14:30:00	3	左膝	2	玉龙道下段	2	自摔	1	3年	2	双板
2018-12-29	12	243	女	30			右肋骨	6	海龙道中段	3	自摔	1	4年	2	双板
2018-12-29	12	244	女	21	16:00:00	3	头部	1	中级道下段	2	被撞	2.1	3年	2	双板
2018-12-29	12	245	男	28	16:00:00	3			中级道下段	2	撞人	2.1	4年	2	双板
2018-12-29	12	246	男	49	12:25:00	2	左锁骨骨折	6	金龙与玉龙交接处	2	相撞	2.1	10年	3	双板
2018-12-29	12	247	男	50	12:25:00	2			金龙	3	相撞	2.1	8年	3	双板
2018-12-30	12	248	女	26	17:00:00	3	双膝	2	长龙道	1	自摔	1	初学	1	双板
2018-12-30	12	249	女	26	17:00:00	3	右脚踝	10	中级道	2	自摔	1	初学	1	双板
2019-04-06	4	744	男	7	14:40:00	3	右膝	2	雪龙道下段	3	自摔（速度快）	1.1			双板
2018-12-30	12	251	女	30	15:00:00	3	肋骨	6	中华龙道	3	自摔（速度快撞网上）	1.1	初学	1	双板
2018-12-30	12	252	女	21	10:30:00	1	左肱骨头骨折	7	腾龙道上段	3	自摔（速度快）	1.1	1年	1	双板
2018-12-30	12	253	女	36	12:00:00	2	右膝	2	云顶雪道	3	自摔（前面人突然停下）	1.4	1年	1	双板
2018-12-30	12	254	男	42	12:40:00	2			中级道（炫龙道多面）	2	撞人	2.1	1年	1	单板
2018-12-30	12	255	女	31	16:10:00	3	右臀	4	单板练习道	5	被板撞	2.2	初学	1	单板
2018-12-30	12	256	女	37	12:40:00	2	左臂	7	中级道（炫龙道多面）	2	被撞	2.1	3年	2	双板
2018-12-30	12	257	男	36	16:00:00	3	左腿股骨下段骨折	5	猛龙道中段	3	自摔	1	6年	3	双板
2018-12-30	12	258	女	23	15:00:00	3	嘴里创口	9	长龙道	1	自摔（为了躲人）	1.4			双板
2018-12-30	12	259	男	37	16:15:00	3	腰	4	中级道（炫龙道对面）	2	被撞	2.1			双板
2018-12-30	12	260	男	31	16:15:00	3			中级道（炫龙道对面）	2	撞人	2.1			单板
2018-12-31	12	261	女	32	10:00:00	1	前胸	6	初级道	1	自摔	1	初学	1	双板
2018-12-31	12	262	女	28	16:50:00	3	右肩脱臼	8	玉龙7号	2	自摔（速度快、卡刃）	1.1	2年	1	单板
2018-12-31	12	263	女	23	12:30:00	2	左上臂	7	长龙与短龙交汇口下方	4	自摔（卡雪了）	1.5	1年	1	单板
2018-12-31	12	264	男	25	15:40:00	3	腰	4	长龙道上段	1	被撞	2.1	1年	1	双板
2019-01-01	1	277	男	9	10:30:00	1	左手小拇指骨折	3	云龙下段	3	相撞	2.1	3年	2	双板
2018-12-31	12	266	男	29	13:00:00	2			中级道（炫龙道对面）	2	撞人	2.1	半年	1	单板
2018-12-31	12	267	女	25	14:35:00	3	左脚踝骨裂	10	长龙道上段	1	自摔（撞人了）	2.1	初学	1	双板
2018-12-31	12	268	女	32	15:30:00	3	右肩	8	游龙道第一弯	2	相撞	2.1	4年	2	双板
2018-12-31	12	269	男	38	15:30:00	3			游龙道第一弯	2	相撞	2.1	10多年	4	单板
2018-12-31	12	270	男	40	10:30:00	1	手腕	3	云顶雪道	3	自摔	1			单板
2018-12-31	12	271	男	37	10:50:00	1	颅底骨折、鼻骨、眉骨骨折	9	幸福大道头·	5	相撞	2.1			双板
2018-12-31	12	272	男	29	10:50:00	1	头、脸、颅底骨折	1，9	幸福大道头·	5	相撞	2.1			双板
2019-01-01	1	273	男	37	15:10:00	3	右小腿	5	长龙道上段	1	自摔（转弯时重心不稳）	1.3	1年	1	双板
2019-01-01	1	274	女	31	11:15:00	2	腰	4	玉龙中段	2	自摔（卡刃）	1.5	初学	1	单板
2019-01-16	1	340	男	11	14:00:00	3	右手腕骨折	3	长龙道	1	自摔	1			单板
2019-01-01	1	276	女	47	14:06:00	3	左膝、小腿	2，5	中级道（金龙、玉龙交汇口下方）	4	自摔（为了躲人）	1.4	4年	2	双板
2019-01-28	1	417	男	11	10:50:00	1	作手无名指	3	长龙道	1	自摔	1	初学	1	双板
2019-02-21	2	550	男	11	14:30:00	3	左手腕骨折	3	中级道	2	自摔	1	初学	1	单板
2019-01-01	1	279	女	46	10:20:00	1	左臂	7	玉龙下段	2	自摔	1	10年	3	双板
2019-01-01	1	280	女	43	10:30:00	1	头	1	威龙道上段	3	与人相撞	2.1	9年	3	双板
2019-01-01	1	281	女	33	14:40:00	3	左大腿	5	海龙道底	3	被撞	2.1	20年	4	双板
2019-01-01	1	282	女	24	15:00:00	3	左肘	7	玉龙道	2	自摔	1			双板
2019-01-02	1	283	女	23	16:00:00	3	右肩脱臼	8	游龙入口	2	自摔	1	初学	1	双板
2019-01-02	1	284	女	38	15:55:00	3					相撞	2.1	7年	3	双板
2019-01-02	1	285	男	43	15:55:00	3	左手腕	3	中级道（大奔头对面）	2	相撞	2.1	20年	4	双板
2019-01-05	1	286	女	27	10:31:00	1	右肘关节	7	单板练习道	5	自摔	1	2年	1	单板
2019-01-05	1	287	男	37	11:30:00	2	腰	4	金龙道下段	3	自摔	1	3年	2	双板
2019-01-05	1	288	男	35	09:50:00	1	手指骨裂	3	云龙道底	3	自摔（速度快，撞网杆上）	1.1	3年	2	双板
2019-01-06	1	289	男	29	12:00:00	2	右膝	2	银龙下段	3	自摔	1	2年	1	双板
2018-11-03	11	9	女	7	12:00:00	2	左臀	4	小龙道下段	2	被撞	2.1	1年	1	双板	建议拍片
2019-01-06	1	291	女	40			头	1	中级道（大奔头对面）	2	撞人	2.1	5年	2	双板
2019-01-06	1	292	男	40					中级道（大奔头对面）	2	撞人	2.1	8年	3	单板
2018-11-24	11	77	男	6	11:55:00	2	右腿胫骨下段轻微骨折	5	玉龙道头	2	自摔（速度快、没控制住）	1.1			双板
2019-01-08	1	294	女	23	13:35:00	2	右膝	2	金龙玉龙交叉口处	2	自摔	1	初学	1	双板
2019-01-08	1	295	女	20	13:35:00	2	右膝	2	玉龙道底	2	自摔	1	1年	1	单板
2019-01-08	1	296	男	25	12:10:00	2	左脚踝	10	游龙道中段	2	自摔（速度快）	1.1	2年	1	双板
2019-01-08	1	297	女	55	13:40:00	2	左股骨颈骨折	5	中级道（炫龙道对面）	2	自摔（速度快，失控）	1.1	5年	2	双板
2019-01-08	1	298	男	41	11:25:00	2	左肋	6	逸龙道（与雨龙道交叉处）	3	自摔（摔倒网外）	1.3			双板
2019-01-09	1	299	女	41	13:00:00	2	左膝韧带	2	卧龙道	1	自摔	1	初学	1	双板
2019-01-09	1	300	男	62	11:00:00	2	左小臂	7	长龙道	1	自摔	1	初学	1	双板
2019-01-09	1	301	女	25	16:10:00	3	头	1	玉龙道	2	自摔	1	1年	1	单板
2019-01-09	1	302	男	36	14:40:00	3	头、腰	1，4	中级道（炫龙道对面上方）	2	自摔	1	2年	1	双板
2019-01-09	1	303	女	55	13:25:00	2	左肘关节脱臼	7	长龙道上段	1	自摔（速度快失控撞网）	1.1	2年	1	双板
2019-01-09	1	304	男	20	15:00:00	3	右大腿	5	祥龙道底	3	自摔（速度快）	1.1	2年	1	双板
2019-01-09	1	305	女	27	14:40:00	3	右小腿	5	金龙道中段	3	被撞	2.1	3年	2	单板
2019-01-09	1	306	男	41	14:20:00	3	左上臂骨折	7	霜龙道入口	3	自摔（卡刃）	1.5	10年	3	单板
2019-01-09	1	307	男	26	14:40:00	3			金龙道中段	3	撞人	2.1			单板
2019-01-10	1	308	女	22	13:35:00	2	双膝	2	长龙道（与游龙交叉口处）	1	自摔	1	1年	1	双板
2019-01-10	1	309	男	22	16:40:00	3	肋骨	6	中级道底	2	相撞	2.1	2年	1	单板
2019-01-10	1	310	女	40	12:10:00	2	左膝	2	腾龙上段	3	自摔（速度快）	1.1	3年	2	双板
2019-01-10	1	311	男		11:10:00	2	右膝	2	云顶雪道	3	自摔（为了躲人）	1.4	5年	2	双板
2019-01-10	1	312	男	22	16:40:00	3	左脚	10	中级道底	2	相撞	2.1	5年	2	单板
2019-01-10	1	313	男	60	12:00:00	2	右膝	2	云顶雪道	3	自摔	1	10年	3	双板
2019-01-10	1	314	男	14	13:44:00	2	头	1	小龙道（旁边的树林）	2	自摔	1			双板
2019-01-10	1	315	男	25	09:50:00	1	左肩	8	中级道底	2	相撞	2.1			双板
2019-01-11	1	316	女	45	15:00:00	3	右腿	5	玉龙道	2	自摔	1	3年	2	双板
2019-01-12	1	317	男	31	14:30:00	3	右膝	2	长龙道上段	1	自摔	1	初学	1	双板
2019-01-12	1	318	男	29	16:20:00	3	右脚踝	10	长龙中段	1	自摔	1	2年	1	双板
2019-01-12	1	319	男	26	14:30:00	3	头	1	银龙道中段	3	自摔	1	1年	1	单板
2019-01-12	1	320	女	55	10:31:00	1	左手腕	3	大厅门前	3	自摔	1	初学	1	双板
2019-01-12	1	321	女	26	12:10:00	2	右手腕	3	中级道底	2	被撞	2.1	初学	1	单板
2019-01-12	1	322	男	21	12:00:00	2	左膝	2	长龙上段	1	自摔	1	4年	2	单板
2019-01-12	1	323	女	28	15:30:00	3	右膝	2	游龙上段	2	自摔	1	3年	2	双板
2019-01-12	1	324	男	24	12:10:00	2	右手腕	3	中级道	2	自摔	1	3年	2	单板
2019-01-13	1	325	女	19	10:29:00	1	左脚踝	10	银龙转小龙处	4	自摔（卡刃）	1.5	9年	3	单板
2019-01-14	1	326	男	13	12:00:00	2	右手腕	3	长龙中段	1	自摔（卡刃）	1.5	初学	1	单板
2019-01-14	1	327	女	22	08:50:00	1	鼻子	9	中级道（炫龙道对面）	2	相撞	2.1	1年	1	单板
2019-01-14	1	328	男	28	08:50:00	1	脸、鼻子	9	中级道（炫龙道对面）	2	相撞	2.1	5年	2	双板
2019-01-14	1	329	男	51	10:50:00	1	右手腕、小拇指外伤手腕骨裂、小拇指肌腱断裂	3	玉龙、金龙交汇处	4	被撞	2.1	3年	2	单板
2019-01-15	1	330	女	23	15:20:00	3	左肩	8	中级道下段	2	自摔（卡刃）	1.5	初学	1	单板
2019-01-15	1	331	女	21			头	1	初级道	1	相撞	2.1	半年	1	单板
2019-01-15	1	332	女	25	10:00:00	1	眼睛、胯部	9，5	中级道下段	2	相撞	2.1	3年	2	单板
2019-01-15	1	333	男	35	10:00:00	1	右腰	4	中级道下段	2	相撞	2.1	10年	3	双板
2019-01-15	1	334	男	13	12:00:00	2	左侧眉毛	9	山顶餐厅	5	自摔	1			双板
2019-01-16	1	335	男	20	15:05:00	3			玉龙道	2	相撞	2.1	1年	1	双板
2019-01-16	1	336	男	13	14:00:00	3	右手小拇指	3	金龙、玉龙交汇处	4	被撞	2.1	1年	1	双板
2019-01-16	1	337	男	29	16:00:00	3	右肋骨折、右肾挫伤	6	云龙道	3	自摔	1	5年	2	单板
2019-01-16	1	338	女	73	15:05:00	3	右膝	2	玉龙道	2	相撞	2.1	5年	2	双板
2019-01-16	1	339	男	60	10:20:00	1	腰椎压缩性骨折	4	云龙道	3	自摔	1	10年	3	双板
2019-01-25	1	398	男	7	15:20:00	3	右腿	5	金龙道	3	相撞	2.1			双板
2019-01-17	1	341	男	22	11:00:00	2	头	1	玉龙下段	2	自摔	1	初学	1	单板
2019-01-17	1	342	女	18	15:10:00	3	左膝	2	金龙、玉龙交汇处	4	被撞	2.1	初学	1	双板
2019-01-17	1	343	男	50	15:10:00	3			金龙、玉龙交汇处	4	撞人	2.1	2年	1	双板
2019-01-17	1	344	男	35	12:00:00	2	腰	4	云顶雪道	3	自摔	1	3年	2	双板
2019-01-17	1	345	男	21	15:10:00	3	左膝	2	金龙、玉龙交汇处	4	被撞	2.1	5年	2	双板
2019-01-17	1	346	男	44	14:40:00	3	左肩、左小腿	5，8	中级道与酷龙道交汇处	4	被撞	2.1	5年	2	双板
2019-01-17	1	347	男	23	14:40:00	3	牙	9	中级道与酷龙道交汇处	4	撞人	2.1	7年	3	单板
2019-01-29	1	428	男	9	14:00:00	3	右小腿	5	长龙道上段	1	被撞	2.1			双板
2019-02-02	2	451	男	8	16:10:00	3	左小腿	5	金龙道第二个炮	3	被撞	2.1	5年	2	双板
2019-01-18	1	350	男	19	11:27:00	2	右膝	2	银龙上段	2	自摔（滑累了）	1.2	7年	3	双板
2019-01-18	1	351	男		16:21:00	3	左大腿骨折	5	长龙道（通云顶处）	1	自摔（第一次速度快摔网外）	1.2			双板
2019-01-19	1	352	男	26	15:00:00	3	左肋、胸骨	6	长龙道下段	1	自摔	1	1年	1	单板
2019-01-19	1	353	女	38	12:30:00	2	左脚踝骨裂	10	长龙道下段	1	自摔	1	初学	1	双板
2019-01-19	1	354	男	25	16:00:00	3	左膝	2	长龙、玉龙交汇处	4	自摔（速度快撞树）	1.1	初学	1	双板
2019-01-19	1	355	男	34	12:00:00	2	右手	3	长龙道中段	1	相撞	2.1	初学	1	双板
2019-01-19	1	356	男	35	14:00:00	3	左锁骨	6	长龙道	1	自摔	1	10年	3	单板
2019-02-07	2	470	男	5			右小腿	5	山顶雪圈道	5	自摔	1	初学	1	双板
2019-01-19	1	358	女	36	14:00:00	3	左膝	2	长龙道	1	自摔	1			双板
2019-01-19	1	359	男	37	10:00:00	1	右肩	8	云顶雪道	3	自摔	1			单板
2019-02-25	2	596	女	5	14:00:00	3	左小腿骨折	5	长龙道	1	自摔	1			双板
2019-03-17	3	685	女	7	09:30:00	1	右腿股骨下段骨折	5	中级道（二索平台）	2					双板
2019-01-19	1	362	女	38	13:00:00	2	头	1	中级道	2	被撞	2.1			双板
2019-01-20	3	363	男	23	13:00:00	2	膝盖	2	长龙道	1	自摔	1	1年	1	双板
2019-01-20	1	364	男	14	10:50:00	1	右膝	2	玉龙下段	2	自摔	1	2年	1	双板
2019-01-20	1	365	女	23	14:00:00	3	头	1	游龙道第一弯	2	自摔（第一次滑失控）	1.2	初学	1	双板
2019-01-20	1	366	女	47	11:30:00	2	右脚踝	10	长龙中段	1	自摔（没保持好平衡）	1.3	初学	1	单板
2019-01-20	1	367	男	29	14:50:00	3	右肩	8	五彩龙中段	2	自摔（卡刃）	1.5	2年	1	单板
2019-01-20	1	368	男	43	16:20:00	3	左胯	5	初级道中段	1	被撞	2.1	初学	1	双板
2019-01-20	1	369	男	37	10:37:00	1	右肩脱臼	8	游龙道（单板公园底）	2	自摔	1	5年	2	单板
2019-01-20	1	370	女	24	13:00:00	2	右胸	6	金龙玉龙交汇处	4	自摔	1	5年	2	单板
2019-01-20	1	371	男	35	13:30:00	2	头	1	长龙道	1	被撞	2.1	3年	2	单板
2019-01-20	1	372	女	48	14:10:00	3	左膝	2	七彩龙下段	3	自摔（没控制好平衡）	1.3	10年	3	双板
2019-01-20	1	373	女	17	12:00:00	2	腰椎压迫性骨折	4	小龙道与酷龙道转弯处	4	自摔	1			单板
2019-04-06	4	737	男	9	14:00:00	3	右胫骨骨折	5	中级道（炫龙道底）	2	自摔（卡刃）	1.5	1年	1	双板
2019-01-21	1	375	男	48	11:10:00	2	左膝	2	金龙下段	3	自摔	1	15年	4	双板
2019-01-21	1	376	男		09:25:00	1	左手腕	3	大厅门口	5	自摔	1			双板
2019-01-21	1	377	男	40	11:30:00	2	胸骨骨折	6	腾龙14号	3	自摔	1			双板
2019-01-22	1	378	男	28	12:48:00	2	右肩脱臼	8	长龙道（与玉龙道交叉处上方）	1	自摔（速度快）	1.1	初学	1	双板
2019-01-22	1	379	女	27	12:00:00	2	右膝	2	炫龙与酷龙交汇处	4	被撞	2.1	1年	1	双板
2019-01-22	1	380	男	16	12:00:00	2	左膝	2	炫龙与酷龙交汇处	4	撞人	2.1	初学	1	双板
2019-01-22	1	381	男	64	15:20:00	3	头、右肩	1，8	游龙道第一个弯	2	自摔	1	12年	4	双板
2019-01-23	1	382	女	24	16:00:00	3	右上臂	7	玉龙道	2	自摔	1	半年	1	单板
2019-01-23	1	383	女	21	10:50:00	1	前胸、肚子	6	中级道（炫龙对面）	2	撞人	2.1	2年	1	双板
2019-01-23	1	384	女	38	15:20:00	3	左膝	2	恐龙道	3	自摔	1	4年	2	双板
2019-01-23	1	385	男	30	09:40:00	1	右膝	2	中级道（大奔头底）	2	自摔	1	10年	3	双板
2019-01-23	1	386	男	62	10:50:00	1	手	3	中级道（炫龙对面）	2	被撞	2.1	6年	3	双板
2019-01-23	1	387	女	26	15:30:00	3	左肩	8	紫龙道	3	被撞	2.1	9年	3	双板
2019-01-23	1	388	女	21	14:00:00	3	右膝	2	大厅门口	5	被砸	3			单板
2019-01-24	1	389	男	27	10:08:00	1	右膝	2	长龙道入口	1	自摔	1	初学	1	双板
2019-01-24	1	390	男	25	12:00:00	2	左手腕	3	玉龙道	2	自摔	1	初学	1	单板
2019-01-24	1	391	男	34	14:40:00	3	左肩脱臼	8	海龙道	3	自摔	1	10年	3	双板
2019-01-25	1	392	男	36	15:00:00	3	右脚踝线型骨折	10	长龙道	1	自摔（速度快）	1.1	2年	1	双板
2019-01-25	1	393	男	20	14:42:00	3	头部	1	中级道	2	撞人	2.1	初学	1	单板
2019-01-25	1	394	男	29			右肩	8	中级道	2	被撞	2.1	2年	1	单板
2019-01-25	1	395	男		13:28:00	2	左手桡骨骨折	3	中级道（单板练习区）	2	自摔	1
2019-01-25	1	396	女	34	12:00:00	2	头	1	中级道底	2	被撞	2.1			单板
2019-01-25	1	397	女	23	12:00:00	2			中级道底	2	撞人	2.1
2018-11-17	11	61	男	11	13:10:00	2	右锁骨骨裂	6	山顶儿童乐园	5	自摔（滑梯摔下来）	1.2				送医院
2019-01-25	1	399	女	27	15:45:00	3			金龙道	3	相撞	2.1			单板
2019-01-26	1	400	女	42	13:20:00	2	左膝	2	玉龙道	2	自摔	1	1年	1	双板
2019-01-26	1	401	男	24	12:00:00	2	左手腕	3	大厅门口	5	自摔	1	2年	1	单板
2019-01-26	1	402	男	27	13:50:00	2	后背	8	绿龙道	3	自摔	1	2年	1	双板
2019-01-26	1	403	男	20	13:30:00	2					撞人	2.1	初学	1	双板
2019-01-26	2	404	女	26	16:00:00	3	左膝双侧韧带	2	中级道	2	自摔	1	3年	2	单板
2019-01-26	1	405	女	35	14:00:00	3	右膝	2	长龙道4号	1	自摔（转弯时没控制好速度）	1.1	3年	2	双板
2019-01-18	1	348	男	11	14:26:00	3	左锁骨	6	游龙第一个弯	2	自摔（速度快）	1.1	2年	1	双板
2019-01-26	1	407	男	48	12:00:00	2	左锁骨骨折	6	玉龙道3号	2	自摔（转弯时没控制好速度）	1.1	6年	3	双板
2019-01-26	1	408	男	50	13:30:00	2	右臂、头	1，7	玉龙、金龙交汇处	4	被撞	2.1	8年	3	双板
2019-01-27	1	409	男	41	11:00:00	2	右肩、左髌骨	8	玉龙道3号	2	自摔	1	2年	1	双板
2019-01-27	1	410	男	17	15:30:00	3	右肘关节	7	游龙道3号	2	自摔（速度快，撞网上）	1.1	初学	1	双板
2019-01-27	1	411	女	28	14:30:00	3	左臀外侧	4	长龙道	1	被撞	2.1	2年	1	双板
2019-01-27	1	412	男	26	14:30:00	3	左臂	7	长龙道	1	撞人	2.1	1年	1	双板
2019-01-27	1	413	男	40	14:00:00	3	右肩	8	游龙道（单板公园底）	2	自摔	1	3年	2	双板
2019-01-27	1	414	男	45	11:30:00	2	左锁骨	6	中级道（炫龙道对面	2	自摔（速度快、撞减速提示王）	1.1	10年	3	双板
2019-01-27	1	415	女	28	10:30:00	1	大腿外侧	5	金龙下段	3	被撞	2.1			双板
2019-01-27	1	416	男	40	10:30:00	1			金龙下段	3	撞人	2.1			双板
2019-01-30	1	433	男	10	15:48:00	3	右锁骨	6	恐龙道与飞龙道连接处	4	自摔	1	3年	2	双板
2019-01-28	1	418	男	21	17:00:00	3	左脚背外侧	10	玉龙道口	2	自摔	1	初学	1	单板
2019-01-28	1	419	男	30	10:30:00	1	嘴	9	金龙道	3	自摔	1	2年	1	双板
2019-01-28	1	420	女	43	13:10:00	2	右手臂	7	祥龙道	3	撞树	2.2	2年	1	双板
2019-01-28	1	421	男	66	15:00:00	3	头	1	云顶雪道	3	自摔	1			双板
2019-01-29	1	422	男	13	11:00:00	2	双手腕	3	长龙道	1	自摔	1	1年	1	单板
2019-01-29	1	423	男	26	15:50:00	3	右肘关节	7	中级道龙道底	2	自摔	1	2年	1	单板
2019-01-29	1	424	女	37	10:40:00	1	左脚踝	10	大奔头底	3	自摔（走神）	1.2	初学	1	双板
2019-01-29	1	425	女	16	09:45:00	1	右肩	8	酷龙道底	2	自摔（没控制好平衡）	1.3	初学	1	单板
2019-01-29	1	426	男	20	11:50:00	2	左手大拇指	3	猛龙道入口野雪区	5	自摔（有冰）	1.6	2年	1	双板
2019-02-11	2	493	男	12	16:30:00	3	右锁骨骨折	6	祥龙道5号支架	3	自摔	1	1年	1	双板
2018-11-24	11	76	女	7	16:50:00	3	左上臂	7	初级道	1	自摔	1			单板
2019-01-29	1	429	女		14:00:00	3			长龙道上段	1	撞人	2.1			单板
2019-01-30	1	430	男	32	13:00:00	2	左手腕	3	长龙道中段	1	自摔	1	初学	1	单板
2019-01-30	1	431	女	28	13:50:00	2	左肘关节	7	初级道	1	自摔	1	初学	1	单板
2019-01-30	1	432	男	29	10:30:00	1	右上臂骨折	7	玉龙道入口	2	自摔（卡刃）	1.5	2年	1	单板
2018-12-08	12	147	男	10	14:30:00	3	左上臂	7	猛龙道上段	3	自摔	1	5年	2	双板
2019-01-19	1	360	女	9	10:58:00	1	左上臂骨裂	7	雪龙道中段	3	自摔（卡刃）	1.5			单板
2019-01-31	1	435	女	35	14:40:00	3	右肘关节	7	二索平台下方	5	自摔（卡刃）	1.5	初学	1	单板
2019-01-31	2	436	男	15	13:30:00	2	双腿	5	云顶雪道	3	自摔	1	5年	2	双板
2019-01-31	1	437	女	26	16:00:00	3	左肋	6	金龙中段	3	自摔	1	3年	2	单板
2019-01-31	1	438	女		10:40:00	1	左膝	2	游龙上段	2	自摔	1			双板
2019-02-01	2	439	女	30	11:00:00	2	腿	5	长龙道	1	自摔	1	初学	1	双板
2019-01-20	1	374	女	9	10:00:00	1	左肘关节	7	大厅	5	自摔	1			双板
2019-02-01	2	441	女	25	14:00:00	3	右膝韧带	2	大奔头	3	自摔	1	5年	2	双板
2019-01-26	1	406	女	12	09:45:00	1	左手臂骨折	7	中级道（炫龙道多面）	2	被撞	2.1	3年	2	单板
2019-02-01	2	443	男	46	16:20:00	3	左腿	5	银龙道	3	自摔	1	8年	3	双板
2019-02-01		444	男	64	10:00:00	1	左肩	8	游龙道下段	2	撞杆	2.2	8年	3	双板
2019-02-01	2	445	男	27	11:10:00	2			海龙道	3	撞人	2.1			双板
2019-02-02	2	446	男	36	10:00:00	1	右膝	2	长龙道	1	自摔	1	初学	1	单板
2019-02-02	2	447	男	23	14:40:00	3			玉龙道头	2	撞人	2.1	初学	1	双板
2019-02-02	2	448	男	31	16:10:00	3			金龙道第二个炮	3	撞人	2.1	2年	1	单板
2019-02-02	2	449	男	19	13:30:00	2	右手腕	3	山顶	5	自摔	1	5年	2	单板
2019-02-02	2	450	男	58	11:00:00	2	左腿韧带	5	游龙道入口	2	自摔（速度快）	1.1	3年	2	双板
2019-02-10	2	487	男	10	14:40:00	3	左上臂	7	中级道底	2	被撞	2.1			单板
2019-02-02	2	452	男	14	11:00:00	2	右臀、右手、又腰	3，4	海龙与逸龙连接处	4	自摔（过旗门撞网外）	1.2			双板
2019-02-02	2	453	男	15	14:40:00	3	鼻骨骨折	9	玉龙道头	2	被撞	2.1			双板
2019-02-03	2	454	女	35	09:10:00	1	右肩	8	长龙与云顶分叉处	1	自摔	1	初学	1	单板
2019-02-03	2	455	男	55	10:30:00	1	右锁骨骨折	6	腾龙道下段	3	自摔（速度快）	1.1	5年	2	双板
2019-02-03	2	456	男	27	10:34:00	1	左肩脱臼	8	游龙道6号	2	自摔（卡刃）	1.5	5年	2	单板
2019-02-05	2	457	男	30	14:40:00	3	右肩脱臼	8	游龙道单板公园	2	自摔（跳台）	1.6	4年	2	单板
2019-02-05	2	458	女		13:30:00	2	右膝	2	长龙道	1	自摔	1			双板
2019-02-06	2	459	男	52	14:50:00	3	左大腿骨折	5	玉龙道入口	2	自摔	1	初学	1	双板
2019-02-06	2	460	男	13	13:00:00	2	头、脸	1，9	游龙道下段	2	自摔	1	1年	1	双板
2019-02-06	2	461	女	42	16:20:00	3	左肋	6	长龙道	1	被撞	2.1	几次	1	双板
2019-02-06	2	462	男	15	14:20:00	3	鼻子	9	长龙道入口	1	撞人	2.1	初学	1	双板
2019-02-06	2	463	男	29	14:30:00	3	左肩胛骨	8	玉龙道中段	2	自摔	1	3年	2	双板
2019-02-06	2	464	男	37	15:00:00	3	左肩胛骨	8	游龙道单板公园	2	自摔	1	3年	2	双板
2019-02-06	2	465	男	34	12:10:00	2	右肩脱臼	8	与云顶通滑道下段	3	自摔（卡刃）	1.5	5年	2	单板
2019-02-06	2	466	男	59	14:20:00	3	胸	6	长龙道入口	1	被撞	2.1	5年	2	双板
2019-02-06	2	467	女	14			头、胸	1，6	酷龙中段	2	自摔	1	8年	3	单板
2019-02-06	2	468	女	32	11:30:00	2	腰	4	长龙道（玉龙道口下方）	1	自摔	1			双板
2019-02-07	2	469	男	27	10:00:00	1	右手腕	3	长龙道	1	自摔	1	2年	1	单板
2019-02-12	2	504	男	11	12:10:00	2	左肘关节	7	海龙道7号	3	自摔（滑雪时用手托地）	1.2	7年	3	单板
2019-02-07	2	471	男	30	12:00:00	2	头部	1	彩龙2	3	自摔（卡刃）	1.5	5次	1	单板
2019-02-07	2	472	男	30	14:40:00	3	左手腕骨折	3	金龙中段	3	相撞（与朋友）	2.1	1年	1	单板
2019-02-19	2	542	男	12	15:30:00	3	左上臂骨折	7	中级道5号	2	自摔	1	5年	2	单板
2019-02-07	2	474	男	53	11:50:00	2	右小腿开放性骨折	5	游龙道单板公园	2	自摔（速度快撞网杆上）	1.1	4年	2	双板
2019-02-07	2	475	男	16	13:30:00	2	左脚踝	10	飞龙道	2	自摔（速度快，失控）	1.1	6年	3	双板
2019-02-08	2	476	男	33	15:30:00	3	左肘关节	7	长龙道	1	自摔	1	初学	1	双板
2019-02-08	2	477	男	34	14:40:00	3	右肩胛骨	8	游龙道最后一个弯	2	自摔（速度快，失控）	1.1	初学	1	单板
2019-02-08	2	478	女	35	12:30:00	2	左腿	5	玉龙道	2	自摔（走错道）	1.2	3年	2	双板
2019-02-08	2	479	男	47	15:20:00	3	左肩锁分离	8	五彩龙下段	2	自摔（卡刃）	1.5	10年	3	单板
2019-02-09	2	480	女	42			右手腕	3	长龙道	1	自摔	1	1年	1	双板
2019-02-09	2	481	女	37	15:00:00	3	盆骨	4	长龙道	1	自摔	1	初学	1	双板
2019-02-09	2	482	男	44			左膝	2	玉龙道入口	2	自摔	1	初学	1	双板
2019-02-09	2	483	女	32	09:50:00	1	右肩	8	长龙道中段	1	自摔（转弯时失去平衡）	1.3	1年	1	单板
2019-02-09	2	484	男	61	08:23:00	1	左膝	2	金龙道	3	自摔	1	4年	2	双板
2019-02-09	2	485	男	40	10:10:00	1	右膝	2	海龙道下段	3	自摔（速度快	1.1	10年	3	双板
2019-02-10	2	486	男	39	14:00:00	3	左膝	2	玉龙道入口	2	自摔（速度快	1.1	初学	1	双板
2019-02-20	2	545	男	11			右肘关节	7	娇龙道	1	自摔（为了躲人）	1.4	3次	1	单板
2019-02-10	2	488	女	36	14:40:00	3			中级道底	2	撞人	2.1			双板
2019-02-11	2	489	男	33	15:40:00	3	左小臂	7	长龙道	1	自摔	1	初学	1	单板
2019-02-11	2	490	女	36	16:00:00	3	手臂外伤	3，7	长龙道	1	自摔	1	初学	1	双板
2019-02-11	2	491	男	39	12:00:00	2	左脚	10	中级道	2	自摔	1	初学	1	双板
2019-02-11	2	492	男	29	13:00:00	2	左手指	3	云顶雪道	3	自摔	1	1年	1	单板
2018-11-10	11	29	女	3	11:30:00	2	左肩	8	中级道下段	2	被撞	2.1			双板
2019-02-11	2	494	女	33	15:20:00	3	右手腕	3	金龙、玉龙交汇处	4	自摔（卡雪	1.5	5次	1	单板
2019-02-11	2	495	男	20	16:20:00	3	脸	9	长龙玉龙分叉处	1	自摔（撞树上）	2.2	初学	1	双板
2019-02-11	2	496	女	42	15:20:00	3	双膝	2	金龙道	3	自摔	1	5年	2	双板
2019-02-11	2	497	男	28	12:00:00	2	右侧肋骨骨折	6	逸龙道上段	3	自摔（摔倒网外）	1.3	3年	2	双板
2019-02-12	2	498	男	22	12:30:00	2	左脚踝	10	玉龙道平坡	2	自摔	1	初学	1	双板
2019-02-12	2	499	女	45	13:30:00	2	左膝半月板撕裂	2	长龙道	1	自摔	1	5年	2	双板
2019-02-12	2	500	男	23	11:00:00	2	肋骨	6	游龙道公园	2	自摔	1	3年	2	单板
2019-02-12	2	501	女	43	14:00:00	3	右膝	2	霜龙道	3	自摔	1	5年	2	双板
2019-02-12	2	502	女	50	15:30:00	3	左膝	2	游龙道3号	2	自摔（速度快	1.1	5年	2	双板
2019-02-12	2	503	男	21	16:20:00	3	右脚踝	10	玉龙道下段	2	自摔（卡刃）	1.5	3年	2	双板
2018-12-16	12	186	男	11	11:30:00	2	右肩脱臼	8	中级道底	2	自摔（卡雪）	1.5	3年	2	单板
2019-02-12	2	505	男	56	11:00:00	2	右肩锁骨	8	海龙道20号	3	自摔（卡雪）	1.5	10年	3	双板
2019-02-12	2	506	男		15:40:00	3	左脚踝骨裂	10	祥龙道5号支架旁	3	自摔（滑进树坑里了）	1.2			双板
2019-02-13	2	507	男	37	12:00:00	2	右手腕	3	中级道下段	2	自摔	1	5年	2	双板
2019-02-14	2	508	男	39	12:40:00	2	左膝	2	风龙道上段	3	自摔	1	2年	1	双板
2019-02-14	2	509	男	43	12:00:00	2	左锁骨骨折	6	长龙道第一个弯	1	自摔（速度快，失控）	1.1	2次	1	双板
2019-02-14	2	510	女	61	10:00:00	1	左手	3	玉龙道平坡	2	自摔	1	5年	2	双板
2019-02-14	2	511	男	52	12:40:00	2	左手腕	3	银龙道上段	2	自摔	1	5年	2	单板
2019-02-14	2	512	男	36	13:00:00	2	左脚	10	飞龙道5号	2	自摔	1	4年	2	单板
2019-01-01	1	275	男	7			右肩	8	腾龙道中段	3	自摔	1	3年	2	单板
2019-02-14	2	514	男	31	10:00:00	1	左大腿	5	海龙下段	3	自摔（撞网杆上）	2.2	5年	2	单板
2019-02-14	2	515	男	16	10:10:00	1	右手腕	3	玉龙道9号	2	自摔（卡雪）	1.5	6年	3	双板
2019-02-14	2	516	男	62	12:40:00	2	左小腿骨折	5	银龙道（飞龙道）	2	自摔（野雪道有坑）	1.6	10年	3	双板
2019-02-15	2	517	男	31	16:30:00	3	右锁骨骨折	6	游龙道最后一个弯	2	自摔（速度快，失控）	1.1	3次	1	双板
2019-02-15	2	518	男	27	15:00:00	3			金龙玉龙交汇处下方	4			1年	1	单板
2019-02-15	2	519	男	35	16:30:00	3	右膝	2	游龙第二个弯	2	自摔（卡雪）	1.5	3年	2	双板
2019-02-15	2	520	男	45	10:30:00	1	右膝	2	银龙边上的树林	5	自摔	1	6年	3	双板
2019-02-15	2	521	女	62	13:30:00	2	右胯	5	云顶雪道	3	自摔	1	6年	3	双板
2019-02-15	2	522	男	28	15:00:00	3	左大腿	5	金龙玉龙交汇处下方	4			8年	3	双板
2019-02-16	2	523	女	29	16:30:00	3	右肘关节	7	长龙道大水池旁	1	自摔	1	1年	1	单板
2019-02-16	2	524	男	30	11:50:00	2	右脚踝	10	绿龙10号	3	自摔(速度快，失控）	1.1	5年	2	双板
2019-02-16	2	525	男	27	12:30:00	2	左膝	2	雪龙旁的野雪区	5	自摔（转弯时卡树上）	1.6	3年	2	单板
2019-02-16	2	526	男	46	14:00:00	3	右膝	2	大奔头	3	自摔	1	10年	3	双板
2019-02-16	2	527	男	35	16:20:00	3	腰	4	银龙道2号下方	3	自摔（卡雪）	1.5	8年	3	单板
2019-02-17	2	528	男	13	10:50:00	1	左脚	10	金龙玉龙交汇处	4	自摔（速度快，摔网外）	1.1	4次	1	双板
2019-02-17	2	529	女	26	16:40:00	3	右脚踝	10	玉龙道8号	2	自摔（减速时板卡雪）	1.5	初学	1	单板
2019-02-17	2	530	男	27	16:00:00	3	头部	1	海龙下段	3	自摔	1	4年	2	单板
2019-02-17	2	531	女	37	10:30:00	1	右膝	2	霜龙入口	3	自摔	1	5年	2	双板
2019-02-17	2	532	男	46	15:05:00	3	做肩胛骨	8	中级道1号	2	自摔（做平行回转时没登住）	1.2	5年	2	双板
2019-02-18	2	533	女	37	16:00:00	3	左腕关节桡骨骨折	3	长龙道	1	自摔	1	初学	1	单板
2019-02-18	2	534	男	30	13:53:00	2	左膝	2	云顶雪道	3	被撞	2.1	2年	1	单板
2019-02-18	2	535	男	16	09:50:00	1			银龙5号	3	撞人	2.1	1个月	1	单板
2019-02-18	3	536	男	34	12:00:00	2	左膝韧带断裂	2	中级道	2	自摔	1	3年	2	双板
2019-02-18	2	537	女	22	12:00:00	2	左脚踝	10	金龙道	3	自摔	1	4年	2	双板
2019-02-18	2	538	女	41	09:50:00	1	肋骨	6	银龙4号	3	被撞	2.1	3年	2	双板
2019-02-18	2	539	男	51	09:30:00	1	左肘关节	7	大厅门口	5	自摔	1			双板
2019-02-18	2	540	男	48	14:40:00	3	左肘关节	7	祥龙道	3	自摔	1			双板
2019-02-18	2	541	女	35	16:00:00	3	右小腿	5	金龙上段	3	自摔（卡雪）	1.5			双板
2019-01-18	1	349	女	11	11:15:00	2	左肩	8	腾龙道上段	3	自摔（卡刃）	1.5	1年	1	双板
2019-02-19	2	543	女	13	09:42:00	1	左锁骨骨折	6	腾龙与逸龙交界处	4	自摔	1	3年	2	单板
2019-02-20	2	544	男	38	16:30:00	3	左膝内侧	2	长龙道	1	自摔	1	初学	1	双板
2019-01-01	1	278	男	7	10:30:00	1	鼻骨	9	云龙下段	3	相撞	2.1	4年	2	双板
2019-02-20	2	546	女	55	10:00:00	1	右小腿	5	中级道	2	自摔	1	3年	2	双板
2019-02-20	2	547	男	35	16:00:00	3	肋骨	6	中级道	2	自摔	1	3年	2	单板
2019-02-20	2	548	女	38	10:00:00	1	右膝	2	娇龙道	1	自摔	1			双板
2019-01-19	1	361	男	6			嘴	9	长龙道	1	被撞	2.1			双板
2019-02-14	2	513	男	11	11:00:00	2	脖子	9	金龙道	3	自摔	1	5年	2	单板
2019-02-21	2	551	男	63	11:30:00	2	做膝内侧	2	海龙道	3	自摔	1	2年	1	双板
2019-02-21	2	552	女	22	11:06:00	2	左腿	5	中级道	2	被撞	2.1	初学	1	双板
2019-02-21	2	553	女	6	10:30:00	1	下巴	9	玉龙酷龙交汇处	4	别撞	2.1	初学	1	双板
2019-02-21	2	554	女	14	10:30:00	1			玉龙酷龙交汇处	4	撞人	2.1	1年	1	单板
2019-02-21	2	555	男	50	12:30:00	2	头部	1	长龙道	1	自摔	1	5年	2	单板
2019-02-21	2	556	男	57	11:06:00	2			中级道	2	撞人	2.1	4年	2	双板
2019-02-21	2	557	女	55	11:40:00	2	头部、左胸	1，6	海龙道底	3	被撞	2.1	5年	2	双板
2019-02-21	2	558	男	38	11:40:00	2			海龙道底	3	撞人	2.1	3年	2	单板
2019-02-21	2	559	男	31	11:35:00	2	右手	3	银龙道	3	自摔	1	8年	3	双板
2019-02-21	2	560	男	51	14:50:00	3	右腿、腰	4，5	中级道	2	相撞	2.1	10年	3	双板
2019-02-21	3	561	男	25			右膝韧带断裂	2	玉龙上段	2	自摔	1			双板
2019-02-21	2	562	女	32	14:50:00	3	头部	1	中级道	2	相撞	2.1
2019-02-21	2	563	男	13	16:15:00	3	头	1	中级道底	2	相撞	2.1			双板
2019-02-21	2	564	女	29	16:15:00	3	膝盖、头	1，2	中级道底	2	相撞	2.1			双板
2019-02-22	2	565	男	41	12:00:00	2	右膝	2	飞龙道	2	自摔	1	4年	2	双板
2019-02-22	2	566	男	51	13:00:00	2	肋骨	6	长龙道	1	自摔	1	10年	3	双板
2019-02-23	2	567	女	25	14:30:00	3	右肩	8	五彩龙道	2	自摔	1	2年	1	单板
2019-02-23	2	568	女	38	15:10:00	3	右手腕骨折	3	玉龙道5号	2	自摔（向下坐时，不小心坐到了手）	1.2	半年	1	单板
2019-02-23	2	569	女	27	14:00:00	3	左肘关节	7	中级道（大奔头底）	2	被撞	2.1	2年	1	单板
2019-02-23	2	570	女	33	09:50:00	1	头部	1	单板教学区旁	5	被撞	2.1	1年	1	单板
2019-02-23	2	571	男	25	16:40:00	3			金龙、玉龙交汇处	4			1年	1	单板
2019-02-23	2	572	女	50	10:00:00	1	左膝	2	银龙连大奔头处	3	扭伤	3	1年	1	双板
2019-02-23	2	573	男	24	10:00:00	1	右膝	2	长龙道	1	自摔	1	3年	2	双板
2019-02-23	2	574	男	26	09:00:00	1	下巴	9	银龙道	3	自摔	1	4年	2	单板
2019-02-23	2	575	男	32			右肩脱位	8	云龙道	3	自摔（走神了）	1.2	3年	2	双板
2019-02-23	2	576	男	54	12:05:00	2	左髋	4	中级道四号	2	自摔（雪道上有光坡）	1.6	5年	2	双板
2019-02-23	2	577	男	39	16:20:00	3	腰	4	游龙道5号	2	被撞	2.1	3年	2	双板
2019-02-23	2	578	男		12:23:00	2	右胸	6	中级道下段	2	被撞	2.1	5年	2	双板
2019-02-23	3	579	男	31	11:00:00	2	左上臂骨折	7	云顶雪道	3	相撞	2.1	3年	2	单板
2019-02-23	2	580	男	29	09:50:00	1			单板教学区旁	5	撞人	2.1	3年	2	单板
2019-02-23	2	581	男	28	16:40:00	3	脸、嘴	9	金龙、玉龙交汇处	4			3年	2	双板
2019-02-23	2	582	男	38	13:20:00	2	腰、腿	4，5	玉龙、金龙交汇处	4	自摔	1	6年	3	双板
2019-02-23	2	583	男	30	16:20:00	3			游龙道5号	2	撞人	2.1	8年	3	双板
2019-02-23	2	584	男	24	12:23:00	2			中级道下段	2	撞人	2.1	6年	3	双板
2019-02-23	2	585	男	55	13:40:00	2	头部	1	中级道底	2			10年	3	双板
2019-02-23	2	586	男	30	13:40:00	2	臀部	4	中级道底	2			6年	3	双板
2019-02-23	2	587	男	36	16:00:00	3	右腿	5	小龙道	2	自摔	1			双板
2019-02-23	2	588	男	55	14:20:00	3	左腿	5			自摔	1			双板
2019-02-23	2	589	女		15:00:00	3	头部	1	云顶雪道	3	被撞	2.1			双板
2019-02-24	2	590	男	30	12:30:00	2	肋骨	6	长龙道12号	1	自摔	1	初学	1	单板
2019-02-24	2	591	女	37	15:00:00	3	左膝	2	云顶雪道	3	被撞	2.1	2年	1	双板
2019-02-24	2	592	女	39	14:00:00	3	右手腕骨折	3	云顶雪道	3	被撞	2.1	2年	1	单板
2019-02-24	2	593	男	30	11:00:00	2	左肩锁	8	长龙道	1	自摔	1	3年	2	单板
2019-02-24	2	594	男	30	11:00:00	2	左膝	2	黄龙道中段	3	自摔（没控制好平衡）	1.3	3年	2	双板
2019-02-24	2	595	男	38	13:00:00	2	右脚踝	10	长龙道（通滑口）	1	自摔（速度快）	1.1	10年	3	双板
2019-03-07	3	629	男	9	15:30:00	3	鼻子	9	腾龙上段	3	被撞	2.1	1年	1	单板
2019-02-25	3	597	男				肋骨	6	云顶雪道	3	自摔	1
2019-02-26	2	598	男	68	12:00:00	2	肋骨	6	游龙道	2	自摔	1	3年	2	双板
2019-02-28	2	599	男	23	11:00:00	2	左膝	2	五彩龙16号	2	自摔（卡雪）	1.5	4年	2	双板
2019-02-28	2	600	男		10:00:00	1	左胯	5	游龙道5号	2	自摔（摔倒网外）	1.3			双板
2019-03-01	3	601	女	14	10:00:00	1	右腿	5	炫龙	3	自摔	1	1年	1	双板
2019-03-01	3	602	女	67			右肩、右腿	5，8	长龙道11号	1	自摔	1			双板
2019-03-01	3	603	男	54	15:52:00	3	心脏猝死	6	六号门	5
2019-03-02	3	604	女	47	13:40:00	2	左肱骨颈骨折	7	长龙道（通滑口）	1	自摔（速度快）	1.1	2次	1	双板
2019-03-02	3	605	女	25	14:30:00	3	右膝轻伤	2	长龙道中段	1	自摔（卡刃）	1.5	2年	1	单板
2019-03-02	3	606	女	50	09:44:00	1	左肩脱臼	8	长龙道11号	1	自摔（撞网上）	2.2	2年	1	双板
2019-03-02	3	607	男	29	15:00:00	3	膝盖	2	长龙道	1	自摔	1	3年	2	单板
2019-03-02	3	608	男	44	12:30:00	2	右膝	2	中级道底	2	自摔	1	7年	3	双板
2019-03-02	3	609	男	42	16:00:00	3	腰	4	云顶雪道	3	自摔	1	10年	3	双板
2019-03-02	3	610	男	20	12:00:00	2	右膝	2	中级道底	2	自摔	1
2019-03-02	3	611	男	37	13:45:00	2	左臂	7	中级道	2	被撞	2.1
2019-03-02	3	612	女	31	13:45:00	2			中级道	2	撞人	2.1
2019-03-02	3	613	男	15	10:50:00	1	左大腿轻伤	5	五彩龙14号	2	自摔（撞树上）	2.2			双板
2019-03-02	3	614	女	36	14:35:00	3	脖子	9	腾龙下段	3	相撞	2.1
2019-03-02	3	615	男	37	14:35:00	3			腾龙下段	3	相撞	2.1
2019-03-02	3	616	男	30	11:30:00	2	腰2压缩性骨折	4	中级道（大奔头底）	2
2019-03-02	3	617	男	30					中级道（大奔头底）	2
2019-03-03	3	618	男	44	15:20:00	3	右手大拇指	3	中级道	2	自摔	1	1年	1	单板
2019-03-03	3	619	男	30	13:00:00	2	右肩	8	玉龙道	2	自摔	1	3年	2	单板
2019-03-03	3	620	女	36	11:50:00	2	左臂骨折	7	银龙道3号	3	自摔（卡刃）	1.5	4年	2	单板
2019-03-03	3	621	男	38	13:13:00	2	右髋关节	4	银龙道	3	自摔	1	10年	3	单板
2019-03-03	3	622	男	28	12:42:00	2	肋骨骨折	6	云龙下段	3	自摔（摔倒网外）	1.3			单板
2019-03-03	3	623	女	21	10:40:00	1	腰	4	银龙道	3	被撞	2.1			单板
2019-03-03	3	624	女	47	13:50:00	2	股骨干骨折	5	祥龙道中段	3	自摔（撞树上）	2.2			双板
2019-03-04	3	625	男	29	14:25:00	3	左锁骨骨折	6	金龙入口下方	3			5年	2	单板
2019-03-04	3	626	男	38	14:25:00	3			金龙入口下方	3					双板
2019-03-06	3	627	男	20			腿	5			自摔	1	初学	1	双板
2019-03-06	3	628	男	49	11:35:00	2	背部	8	中级道	2	被撞	2.1	2年	1	双板
2018-12-02	12	129	男	10	09:00:00	1	左脚踝骨折	10	腾龙道底	3	撞人（前面人突然停下）	2.1	4年	2	双板
2019-03-07	3	630	男	29	13:46:00	2	右小臂骨折	7	玉龙道6号	2	自摔（卡雪）	1.5	3年	2	单板
2019-03-07	3	631	男	38	15:30:00	3	胸口	6	腾龙上段	3	撞人	2.1	5年	2	双板
2019-03-07	3	632	男	53	12:00:00	2	左腿股骨颈骨折	5	风龙下段	3	自摔（雪道有光面）	1.6	10年	3	双板
2019-03-07	3	633	男	42	10:30:00	1	左小臂骨折	7	银龙道公园出口	5	自摔（跳台）	1.6	9年	3	单板
2019-03-08	3	634	男	46	14:30:00	3	肋骨	6	云顶雪道	3	自摔	1			双板
2019-03-09	3	635	男	40	11:30:00	2	左膝	2	游龙入口处	2	自摔（失控撞网）	1.3	3次	1	双板
2019-03-09	3	636	男	66	14:25:00	3	腰	4	中级道3号	2			2年	1	双板
2019-03-09	3	637	女	37	16:50:00	3	头部、眼睛	1	腾龙道下段	3	自摔	1	3年	2	双板
2019-03-09	3	638	男	31	11:40:00	2	右小腿外伤	5	玉龙中段	2	被撞	2.1	3年	2	双板
2019-03-09	3	639	女	32	10:00:00	1	右肩	8	游龙8号	2	自摔	1	7年	3	双板
2019-03-09	3	640	女	53	10:10:00	1	左脚踝	10	腾龙5号	3	自摔	1	10年	3	双板
2019-03-09	3	641	男	31	13:25:00	2	左手	3	腾龙道下段	3	被撞	2.1	6年	3	双板
2019-03-09	3	642	女	50	14:25:00	3			中级道3号	2			8年	3	双板
2019-03-10	3	643	男	36	12:00:00	2	腰	4	初级道	1	自摔（部会刹车，坐地上）	1.2	初学	1	单板
2019-03-10	3	644	男	27	12:40:00	2	左肘关节骨折	7	玉龙道入口对面	2	自摔（为了躲人，撞树）	1.4	1年	1	双板
2019-03-10	3	645	女	27	11:19:00	2	左尾骶骨	4	长龙道2号	1	被撞	2.1	半年	1	双板
2019-03-10	3	646	男	40	11:30:00	2			长龙道2号	1	撞人	2.1	2年	1	单板
2019-03-10	3	647	女	34	09:30:00	1	左桡骨远端、左胫骨平台骨折	5，7	玉龙道9号	2	撞人	2.1	初学	1	双板
2019-03-10	3	648	男	43	12:30:00	2	右膝	2	大奔头	3	自摔	1	3年	2	双板
2019-03-10	3	649	男	64	08:28:00	1	右腿	5	银龙道6号	3			3年	2	双板
2019-03-10	3	650	男	34	08:28:00	1	肋骨轻伤	6	银龙道6号	3			5年	2	单板
2019-03-10	3	651	女	49	12:30:00	2	左脚踝	10	一索上站	5	自摔	1	7年	3	双板
2019-03-12	3	652	女	32	09:30:00	1	腹部	6	玉龙下段	2	自摔	1	2年	1	双板
2019-03-12	3	653	女	33	14:30:00	3	腰	4	银龙中段	3	自摔	1	1个月	1	单板
2019-03-12	3	654	女	30	09:40:00	1	右上臂骨折	7	游龙道8号	2	自摔（速度快，失控）	1.1	2年	1	单板
2019-03-12	3	655	女	36	14:30:00	3	右肩	8	玉龙道平坡	2	自摔	1	8年	3	单板
2019-03-13	3	656	女	26	14:01:00	3	左腿	5	中级道4号	2			2年	1	单板
2019-03-13	3	657	男	33	14:01:00	3			中级道3号	2			2年	1	单板
2019-03-13	3	658	男	39	09:10:00	1	右膝盖	2	云龙道	3	相撞	2.1	5年	2	双板
2019-03-13	3	659	男	57	11:00:00	2	膝盖	2	飞龙道	2	自摔	1	20年	4	双板
2019-03-13	3	660	女		09:10:00	1	右膝盖	2	云龙道	3	相撞	2.1			双板
2019-03-14	3	661	女	33	11:28:00	2	右小腿腓骨骨折	5	酷龙道头	2	自摔	1			双板
2019-03-14	3	662	女	49	09:30:00	1	左膝	2	中级道（大奔头底）	2	自摔	1			双板
2019-03-15	3	663	女	28	15:30:00	3	左脚踝	10	游龙第一个弯	2	自摔	1	初学	1	双板
2019-03-15	3	664	男	41	09:00:00	1	右锁骨骨折	6	金龙上段	3	被撞	2.1	7年	3	单板
2019-03-16	3	665	男	45	09:35:00	1	左肩骨折	8	游龙道6号	2	自摔（换刃时摔的）	1.5	2年	1	单板
2019-03-16	3	666	男	27	10:30:00	1	腰	4	金龙、玉龙交汇处	4	相撞	2.1	1年	1	单板
2019-01-19	1	357	女	10	15:00:00	3	左脚踝	10	金龙上段	3	自摔	1	6年	3	双板
2019-03-16	3	668	男	48			肋骨	6	中级道	2	自摔	1	7年	3	双板
2019-03-16	3	669	男	50	11:00:00	2	右手腕	3	长龙与云顶分叉处	1	自摔（卡刃）	1.5	10年	3	单板
2019-03-16	3	670	女	16	14:00:00	3	头	1	玉龙道	2	被撞	2.1	10年	3	单板
2019-03-16	3	671	男	38	15:45:00	3	头	1	中级道底	2	自摔	1			单板
2019-03-17	3	672	女	25	11:00:00	2	肩部	8	五彩龙道	2	自摔	1	2年	1	单板
2019-03-17	3	673	女	25	13:24:00	2	左肘关节骨折	7	酷龙下段	2	自摔（滑雪时起跳）	1.2	2年	1	单板
2019-03-17	3	674	女	24	14:50:00	3	牙、头	1	金龙、玉龙交汇处	4	被撞	2.1	2年	1	单板
2019-03-17	3	675	女	26	13:00:00	2	头	1	银龙道2号	3	被撞	2.1	1年	1	单板
2019-03-17	3	676	女	43	12:00:00	2	左肩	8	五彩龙	2	自摔	1	3年	2	双板
2019-03-17	3	677	男	27	11:00:00	2	右脚踝	10	L区野雪	5	自摔	1	3年	2	双板
2019-03-17	3	678	男	41	13:00:00	2			银龙道2号	3	撞人	2.1	3年	2	双板
2019-03-17	3	679	男	14	11:00:00	2	左膝	2	五彩龙下段	2	自摔	1	7年	3	单板
2019-03-17	3	680	男	51	10:00:00	1	左肩，颈、背	8	长龙最窄处	1	被撞	2.1	7年	3	双板
2019-03-17	3	681	男	42	10:00:00	1			长龙最窄处	1	撞人	2.1	10年	3	单板
2019-03-17	3	682	男	48	09:30:00	1			中级道（二索平台）	2			20年	4	双板
2019-03-17	3	683	女	43	10:00:00	1	左膝	2	腾龙上段	3	被撞	2.1			双板
2019-03-17	3	684	男	47	10:00:00	1			腾龙上段	3	撞人	2.1			单板
2019-01-29	1	427	男	10	11:34:00	2	左脚踝骨折	10	祥龙、小龙交汇处	4	自摔（速度快、失控）	1.1	3年	2	双板
2019-03-18	3	686	女	39	10:16:00	1	左脚趾	10	中级道（炫龙道底上方）	2	被撞	2.1	2年	1	单板
2019-03-18	3	687	男	41	14:15:00	3	左肋、左腹	6	腾龙下段	3	被撞	2.1	1年	1	双板
2019-03-18	3	688	男	34	10:16:00	1	腰、背	4，8	中级道（炫龙道底上方）	2	撞人	2.1	3年	2	双板
2019-03-18	3	689	男	32	11:06:00	2			银龙中段	3			3年	2	单板
2019-03-18	3	690	女	45	11:06:00	2	头、眼睛	1	银龙中段	3					双板
2019-03-19	3	691	男	24	11:20:00	2	腰	4	金龙中段	3	被撞	2.1	3年	2	单板
2019-03-19	3	692	男	48	15:30:00	3	右膝内侧	2	祥龙道	3	自摔	1	10年	3	双板
2019-03-19	3	693	男	22	11:20:00	2			金龙中段	3	撞人	2.1			双板
2019-03-21	3	694	女	24	12:00:00	2	左脚踝	10	腾龙道	3	自摔	1	2年	1	单板
2019-03-22	3	695	女	21	16:00:00	3	左脚踝	10	玉龙道	2	自摔	1	1年	1	单板
2019-03-22	3	696	女	50	16:05:00	3	右上臂骨折	7	初级道	1	自摔（速度快，失控）	1.1	初学	1	双板
2019-03-22	3	697	女	25	09:30:00	1	左胯	5	玉龙道2号	2	自摔（卡刃）	1.5	1年	1	单板
2019-03-22	3	698	男	28	09:00:00	1	左胯	5	银龙道上段	2	自摔（撞树上）	2.2	2年	1	双板
2019-03-23	3	699	女	27	09:52:00	1	左膝	2	游龙道1号	2	自摔	1	2次	1	双板
2019-03-23	3	700	男	29	08:00:00	1	右臀	4	玉龙道	2	自摔	1	2年	1	单板
2019-03-23	3	701	男	48	13:30:00	2	左肘关节	7	游龙道	2	自摔	1	3年	2	单板
2019-03-23	3	702	男	29	09:52:00	1	右肩锁	8	游龙道	2	自摔	1	4年	2	单板
2019-03-23	3	703	男	42	10:30:00	1	右臂	7	大奔头	3			10年	3	单板
2019-03-23	3	704	女	32	10:30:00	1	头、手	1，3	大奔头	3			8年	3	双板
2019-03-24	3	705	女	27	14:30:00	3	左手腕	3	金龙道	3	自摔	1	初学	1	单板
2019-03-24	3	706	男	48	10:00:00	1	右膝	2	腾龙中段	3	自摔	1	3年	2	双板
2019-03-24	3	707	女		11:00:00	2	左臂骨折	7	腾龙13号	3	自摔（速度快。失控）	1.1			双板
2019-03-25	3	708	女	56	10:40:00	1	腰	4	初级道	1	自摔	1	2次	1	双板
2019-03-25	3	709	女	28	15:10:00	3	右上臂骨折	7	玉龙道13号	2	自摔	1	初学	1	单板
2019-03-25	3	710	男	60	11:20:00	2	右腿	5	中级道	2	自摔	1	多年		双板
2019-03-28	3	711	女	40	13:20:00	2	左大腿	5	玉龙道	2	自摔	1	7年	3	双板
2019-03-29	3	712	男	29	10:25:00	1	腰	4	海龙道	3	被撞	2.1	7年	3	单板
2019-03-29	3	713	男	20	14:30:00	3	左肩胛骨骨折	8	金龙道树林	5	撞树	2.2			单板
2019-03-29	3	714	男	28	10:25:00	1			海龙道	3	撞人	2.1			单板
2019-03-30	3	715	女	22	09:30:00	1	左肩	8	长龙、游龙分叉	1	自摔（卡刃）	1.5	2年	1	单板
2019-03-30	3	716	女	27	15:00:00	3	左脚踝	10	银龙道17号	3	自摔（雪包卡刃）	1.5	3年	2	双板
2019-03-31	3	717	男	29	09:00:00	1	左肩	8	酷龙道	2	自摔	1	2年	1	单板
2019-03-31	3	718	女	27	13:00:00	2	左手腕	3	游龙中段	2	相撞	2.1	1年	1	单板
2019-03-31	3	719	男	23	12:00:00	2			金龙、玉龙交汇处	4	撞人	2.1	2年	1	双板
2019-03-31	3	720	男	51	15:00:00	3	左腿	5	五彩龙	2	自摔	1	3年	2	双板
2019-03-31	3	721	男	46	10:30:00	1	右脚踝	10	中级道（大奔头对面）	2	自摔	1	5年	2	双板
2019-03-31	3	722	女	23	12:00:00	2	右肘关节	7	金龙、玉龙交汇处	4	被撞	2.1	5年	2	双板
2019-03-31	3	723	女	33	11:00:00	2	左小腿骨折	5	金龙道底	3	自摔	1	20年	4	双板
2019-04-01	4	724	男	53	08:30:00	1	膝关节	2			自摔	1			双板
2019-04-02	4	725	女	32	15:50:00	3	腹部	6	玉龙下段	2	被撞	2.1	2年	1	单板
2019-04-02	4	726	男	42	15:50:00	3	右肘关节	7	玉龙下段	2	撞人	2.1	1年	1	单板
2019-04-02	4	727	男	38	13:00:00	2	腰	4	银龙道	3	自摔	1	12年	4	单板
2019-04-04	4	728	男	44	09:50:00	1	膝盖	2	银龙道上段	2	自摔	1	8年	3	单板
2019-04-05	4	729	女	40	12:00:00	2	右肘关节	7	玉龙道	2	自摔	1	1年	1	单板
2019-04-05	4	730	男	36	14:45:00	3	左膝	2	海龙道	3	自摔	1	8年	3	双板
2019-04-05	4	731	男	25	11:00:00	2	右手	3	玉龙道	2	自摔	1			单板
2019-04-05	4	732	女	52	11:30:00	2	腰	4	银龙道	3	自摔	1			双板
2019-04-05	4	733	女	44	10:09:00	1	肋骨	6	玉龙道	2	被撞	2.1			双板
2019-04-05	4	734	男	30	10:09:00	1			玉龙道	2	撞人	2.1			单板
2019-04-06	4	735	男	29	16:15:00	3	左锁骨骨折	6	中级道1号	2	自摔	1	1年	1	单板
2019-04-06	4	736	男	23	11:20:00	2	左右脚	10	威龙道	3	自摔	1	2年	1	单板
2018-12-09	12	155	男	11	12:00:00	2	右肩、右膝	2，8	玉龙道中段	2	相撞	2.1	3年	2	双板
2019-04-06	4	738	女	31	10:40:00	1	头、左腿	1，5	五彩龙道	2	被撞	2.1	2年	1	双板
2019-04-06	4	739	男	29	11:00:00	2	胸、腹部	6	中级道底	2	自摔	1	3年	2	单板
2019-04-06	4	740	男	24	11:00:00	2	左脚背	10	银龙道	3	自摔	1	5年	2	单板
2019-04-06	4	741	男	26	11:40:00	2	右膝	2	银龙道	3	被撞	2.1	3年	2	双板
2019-04-06	4	742	男	56	16:00:00	3	右膝	2	金龙道	3	相撞	2.1	3年	2	双板
2019-04-06	4	743	男	57	08:46:00	1	腰	4	银龙道中段	3			3年	2	双板
2019-01-30	1	434	男	11	10:00:00	1	嘴、右手腕	3，9	娇龙道底	1	自摔	1			双板
2019-04-06	4	745	女	56	08:46:00	1	轻微脑出血	1.1	银龙道中段	3					双板
2019-04-07	4	746	女	42	09:00:00	1	左坐骨神经	5	金龙道	3	自摔	1	8年	3	双板
2019-04-08	4	747	男	25			右肋骨	6	玉龙道	2	自摔	1	2年	1	单板
2019-04-09	4	748	女	30	12:18:00	2	右膝	2	银龙中段	3	自摔	1	初学	1	单板
2019-04-09	4	749	女	26	09:40:00	1	左锁骨	6	中级道（炫龙道对面）	2	自摔（卡刃）	1.5	2年	1	双板
2019-04-09	4	750	女	36	09:40:00	1	右脚踝	10	金龙下段	3	自摔（卡刃）	1.5	2年	1	双板
2019-04-09	4	751	男	47	11:20:00	2	左腿腓骨骨折	5	银龙下段	3	自摔（卡刃）	1.5	3年	2	双板
2019-04-10	4	752	女	51	08:30:00	1	肋骨骨折	6	中级道（炫龙道对面）	2			2年	1	双板
2019-04-10	4	753	男	41	08:30:00	1			中级道（炫龙道对面）	2			1个月	1	单板
2019-04-11	4	754	男	48			右肩锁分离	8	中级道底	2	自摔	1	10年	3	双板
2019-04-12	4	755	女	63	12:00:00	2	左大腿	5	大厅	5	自摔	1			双板

## Sheet: 2018-2019休闲滑雪者
序号	日期	月份编号	性别	年龄	受伤时间	受伤原因	受伤原因（1-摔伤；2-撞伤；3-划伤，扎伤；4-扭伤；5-挫伤；6-碰伤；7-擦伤；8-其他）	初步诊断	损伤类型（1-擦伤和外伤；2-关节损伤及韧带受损；3-肌肉拉伤及软组织损伤；4-骨折，骨裂；5-脑震荡及内脏；6-其他）	受伤部位受伤部位（1-头部（脑部：1.1）；2-膝关节；3-手腕手指；4-腰臀；5-下肢；6-胸肋腹；7-上肢；8-肩背；9-面颈部；10-脚踝；11-软组织）	处理意见	受伤程度
1	2018.11.15	1	男	30	15:00:00	摔伤	1	右食指搽伤	1	3	包扎、消毒	轻度
2	2018.11.16	1	男	41	10:30:00	被撞	2	右小腿搽伤	1	5	消毒、包扎	轻度
3	2018.11.17	1	男	39	11:41:00	摔伤	1	左侧韧带拉伤	2	5	云南白药喷雾、观察	轻度
4	2018.11.18	1	女	36	14:00:00	摔伤	1	轻微脑震荡	5	1.1	观察、休息	轻度
5	2018.11.20	1	女	23	13:00:00	摔伤	1	左面部淤青	3	9	冷敷、休息	轻度
6	2018.11.24	1	女	9	10:00:00	撞伤	2	右眼睑血肿	3	9	冷敷、观察	轻度
7	2018.11.24	1	女	5	12:03:00	自摔	1	左前臂外伤	1	7	云南白药喷雾、观察	轻度
8	2018.11.24	1	女	34	13:30:00	扭伤	4	左侧腓骨骨折	4	5	建议医院X检查	中度
9	2018.11.25	1	男	10	10:30:00	摔伤	1	左手腕骨折及脱臼	4	3	建议医院X检查	中度
10	2018.11.25	1	女	28	14:45:00	摔伤	1	左前臂骨折	4	7	建议医院X检查	中度
11	2018.11.25	1	男	32	15:30:00	摔伤	1	左前臂双骨折	4	7	夹板固定建议医院X检查	中度
12	2018.11.28	1	女	26	11:00:00	相撞	2	左胸壁软组织损伤	3	6	观察，云南白药喷雾	轻度
13	2018.11.28	1	男	31	12:00:00	摔伤	1	右肩关节韧带拉伤	2	8	观察、建议核磁检查	轻度
14	2018.11.28	1	女	23	15:30:00	摔伤	1	左肱骨头骨裂	4	7	建议X检查	中度
15	2018.11.29	1	女	31	11:15:00	相撞	2	轻微脑震荡	5	1.1	观察、休息，	轻度
16	2018.11.29	1	女	28	14:30:00	摔伤	1	右手腕骨折	4	3	建议医院X检查	中度
17	2018.11.30	1	女	37	13:00:00	摔伤	1	左肱骨头脱位	2	7	建议X检查	轻度
18	2018.11.30	1	女	24	14:48:00	摔伤	1	左踝部韧带拉伤	2	9	建议MRI检查	轻度
19	2018.12.01	2	男	53	11:10:00	摔伤	1	左肩关节脱位	2	8	建议X检查	轻度
20	2018.12.01	2	女	29	12:00:00	撞伤	2	鼻部骨折	4	9	建议X检查	中度
21	2018.12.01	2	女	26	12:00:00	摔伤	1	左髋部扭伤	2	4	观察、建议MRI	轻度
22	2018.12.01	2	男	31	13:40:00	摔伤	1	左膝外伤	1	2	建议MRI检查	轻度
23	2018.12.01	2	男	33	14:10:00	撞伤	2	左锁骨骨折	4	6	建议X检查	中度
24	2018.12.01	2	女	29	14:10:00	撞伤	2	右前臂外伤	1	7	建议X检查	轻度
25	2018.12.01	2	男	54	14:40:00	撞伤	2	右肩胛区外伤	1	8	建议MRI检查	轻度
26	2018.12.01	2	女	32	14:47:00	撞伤	2	右锁骨骨裂	4	6	建议X检查	轻度
27	2018.12.01	2	女	19	15:35:00	摔伤	1	颜面部搽伤	1	9	消毒	轻度
28	2018.12.01	2	女	24	15:45:00	摔伤	1	左锁骨骨折	4	6	建议X检查	中度
29	2018.12.01	2	男	43	18:20:00	摔伤	1	右锁骨粉碎性骨折	4	6	建议X检查	中度
30	2018.12.01	2	男	12	18:25:00	摔伤	1	右腿膝关节外伤	1	2	建议MRI检查	轻度
31	2018.12.02	2	女	2	10:10:00	碰伤	6	额头血肿	3	1	建议CT检查	轻度
32	2018.12.02	2	女	28	10:35:00	碰伤	6	额头血肿	3	1	观察，	轻度
33	2018.12.02	2	男	37	11:00:00	碰伤	6	鼻部外伤	1	9	消毒、包扎	轻度
34	2018.12.02	2	女	32	11:50:00	碰伤	6	左膝 外伤	1	2	建议MRI检查	轻度
35	2018.12.02	2	男	25	14:55:00	碰伤	6	左侧软组织损伤	3	11	建议MRI检查	轻度
36	2018.12.02	2	男	31	15:00:00	摔伤	1	左肱骨粉碎性骨折	4	7	建议X检查	中度
37	2018.12.3	2	女	25	16:20:00	摔伤	1	左膝外伤	1	2	建议MRI检查	轻伤
38	2018.12.4	2	男	16	10:10:00	摔伤	1	右拇指韧带拉伤	2	3	建议MRI检查	轻伤
39	2018.12.4	2	女	30	12:25:00	摔伤	1	腰椎压缩性骨折	4	4	建议X检查	中度
40	2018.12.4	2	男	26	15:00:00	撞伤	2	右眼部外伤	1	9	建议CT检查	轻度
41	2018.12.4	2	男	23	15:45:00	摔伤	1	面部搽伤	1	9	清洗、消毒	轻度
42	2018.12.5	2	女	16	11:30:00	摔伤	1	双侧膝部搽伤	1	2	清洗、消毒，建议X	轻度
43	2018.12.6	2	女	33	15:30:00	摔伤	1	双膝外伤	1	2	云南白药喷雾	轻度
44	2018.12.6	2	女	30	16:10:00	摔伤	1	右肩 韧带拉伤	2	8	建议MRI检查	轻度
45	2018.12.8	2	男	6	15:10:00	压伤	8	左腕肌肉拉伤	3	3	建议X检查	轻度
46	2018.12.8	2	女	29	16:50:00	摔伤	1	左前臂肌肉拉伤	3	7	喷雾、观察	轻度
47	2018.12.8	2	女	35	18:30:00	碰伤	6	左肩胛骨粉碎性骨折	4	8	建议X检查	中度
48	2018.12.8	2	男	28	10:25:00	摔伤	1	左肩韧带拉伤	2	8	建议MRI检查	轻度
49	2018.12.8	2	女	25	11:25:00	摔伤	1	左肘部肌肉拉伤	3	7	建议MRI检查	轻度
50	2018.12.8	2	男	6	20:30:00	摔伤	1	右膝韧带拉伤	2	2	建议MRI检查	轻度
51	2018.12.9	2	男	38	10:20:00	摔伤	1	右小腿韧带拉伤	2	5	建议MRI检查	轻度
52	2018.12.9	2	女	27	12:05:00	摔伤	1	尾椎外伤	1	4	观察	轻度
53	2018.12.9	2	女	16	12:55:00	撞伤	2	左股骨下端骨折	4	5	建议X检查	中度
54	2018.12.9	2	女	28	13:00:00	摔伤	1	胸部软组织损伤	3	6	休息、观察	轻度
55	2018.12.9	2	男	31	13:25:00	摔伤	1	右腿 韧带拉伤	2	5	休息 、建议MRI	轻度
56	2018.12.9	2	男	4	15:30:00	摔伤	1	左侧韧带拉伤	2	5	休息 、建议MRI	轻度
57	2018.12.10	2	男	26	11:40:00	撞伤	2	左肩韧带拉伤	2	8	休息，观察	轻度
58	2018.12.12	2	女	31	15:45:00	撞伤	2	右踝韧带拉伤	2	10	云南白药喷雾	轻度
59	2018.12.12	2	男	32	15:45:00	撞伤	2	右腕韧带拉伤	2	3	云南白药喷雾	轻度
60	2018.12.13	2	女	34	14:30:00	扭伤	4	腰部扭伤	3	4	云南白药喷雾，观察	轻度
61	2018.12.13	2	女	32	20:04:00	搽伤	7	下颌搽伤	1	9	清洗、消毒	轻度
62	2018.12.14	2	男	57	12:20:00	摔伤	1	右前臂软组织损伤	3	7	休息、对症治疗	轻度
63	2018.12.14	2	男	26	13:05:00	碰伤	6	舌尖搽伤	1	9	清洗、消毒	轻度
64	2018.12.14	2	男	23	16:45:00	摔伤	1	左肩肌肉拉伤	3	8	观察、建议X检查	轻度
65	2018.12.14	2	男	31	19:35:00	摔伤	1	右肩关节脱位	2	8	建议X检查	轻度
66	2018.12.15	2	男	27	13;28	摔伤	1	腰大肌拉伤	3	4	建议MRI检查	轻度
67	2018.12.15	2	男	27	13:40:00	摔伤	1	右肩关节扭伤	2	8	休息、对症治疗	轻度
68	2018.12.15	2	男	29	14:00:00	摔伤	1	左中指骨裂	4	3	建议X检查	中度
69	2018.12.15	2	男	30	14:10:00	摔伤	1	左髋关节韧带拉伤	2	4	观察、建议MRI	轻度
70	2018.12.15	2	男	28	14:45:00	摔伤	1	右肩关节软组织损伤	3	8	观察、建议MRI	轻度
71	2018.12.15	2	女	27	15:00:00	摔伤	1	双下肢软组织损伤	3	5	观察、建议MRI	轻度
72	2018.12.15	2	女	23	10:15:00	撞伤	2	轻微脑震荡	5	1.1	观察，建议CT检查	轻度
73	2018.12.16	2	男	6	14:30:00	摔伤	1	左腕肌肉拉伤	3	3	建议X检查	轻度
74	2018.12.16	2	女	42	15:07:00	摔伤	1	左手腕骨折	4	3	建议X检查	中度
75	2018.12.16	2	男	17	19:35:00	摔伤	1	右前臂软组织损伤	3	7	建议MRI检查	轻度
76	2018.12.17	2	男	17	10:10:00	摔伤	1	唇部外伤	1	9	清洗、消毒	轻度
77	2018.12.17	2	女	29	12:35:00	摔伤	1	左前臂尺骨骨折	4	7	建议MRI检查	中度
78	2018.12.17	2	男	58	15:00:00	摔伤	1	右腕肌肉拉伤	3	3	休息、观察	轻度
79	2018.12.17	2	女	11	15:25:00	撞伤	2	轻微脑震荡	5	1.1	观察，建议CT检查	轻度
80	2018.12.17	2	男	57	16:30:00	撞伤	2	右肩关节软组织损伤	3	8	休息，观察、喷雾	轻度
81	2018.12.17	2	男	28	17:30:00	撞伤	2	鼻部裂伤	4	9	去医院缝合	轻度
82	2018.12.17	2	男	21	07:55:00	压伤	8	右食指无名指压伤	1	3	上一级医院处理	轻度
83	2018.12.18	2	女	31	13:08:00	摔伤	1	右膝韧带拉伤	2	2	建议MRI检查	轻度
84	2018.12.18	2	女	13	14:05:00	摔伤	1	左侧膝关节韧带拉伤	2	2	建议MRI检查	轻度
85	2018.12.18	2	男	33	16:06:00	摔伤	1	右踝韧带拉伤	2	10	观察、建议MRI	轻度
86	2018.12.18	2	男	30	21:21:00	摔伤	1	左肱骨头下骨折	4	7	建议X检查	中度
87	2018.12.20	2	女	18	14:50:00	摔伤	1	左大腿软组织损伤	3	5	云南白药气雾剂	轻度
88	2018.12.20	2	男	17	17:05:00	摔伤	1	下颌擦伤	1	9	消毒包扎	轻度
89	2018.12.20	2	男	7	19:10:00	摔伤	1	颜面部擦伤	1	9	消毒包扎	轻度
90	2018.12.20	2	女	22	19:40:00	撞伤	2	面部、唇部擦伤鼻部骨折	4	9	建议CT检查	中度
91	2018.12.20	2	男	45	19:40:00	撞伤	2	面部、头部擦伤	1	1	消毒包扎建议CT检查	轻度
92	2018.12.21	2	男	18	11:08:00	摔伤	1	左大腿肌肉拉伤	3	5	建议X检查	轻度
93	2018.12.21	2	女	18	11:08:00	摔伤	1	左髋部外伤	1	4	建议X检查	轻度
94	2018.12.21	2	男	18	11:28:00	摔伤	1	左腕关节	2	3	喷雾、休息	轻度
95	2018.12.21	2	女	40	12:28:00	摔伤	1	右肩肌肉拉伤	3	8	冰敷、观察	轻度
96	2018.12.21	2	女	37	13:28:00	摔伤	1	左肩擦伤	1	8	建议X检查	轻度
97	2018.12.21	2	男	31	18:50:00	摔伤	1	右腹部肌肉拉伤	3	6	云南白药喷雾，观察	轻度
98	2018.12.22	2	男	40	11:00:00	摔伤	1	右踝部扭伤	2	10	云南白药气雾剂休息	轻度
99	2018.12.22	2	女	51	11:07:00	撞伤	2	右肩关节脱位	2	8	建议X检查	轻度
100	2018.12.22	2	女	22	11:50:00	摔伤	1	右膝关节损伤	2	2	建议X检查	轻度
101	2018.12.22	2	女	26	12:30:00	摔伤	1	右手背关节拉伤	2	3	云南白药气雾剂休息	轻度
102	2018.12.22	2	男	33	12:50:00	撞伤	2	右膝内侧韧带拉伤	2	2	建议MRI检查	轻度
103	2018.12.22	2	女	28	14:10:00	撞伤	2	轻微脑震荡	5	1.1	建议MRI检查	轻度
104	2018.12.22	2	女	35	15:15:00	摔伤	1	腹部外伤	1	6	建议B超检查	轻度
105	2018.12.22	2	男	26	15:20:00	撞伤	2	右腕关节损伤	2	3	云南白药气雾剂冷敷	轻度
106	2018.12.22	2	男	42	19:15:00	摔伤	1	右腓骨上段骨折	4	5	建议X检查	中度
107	2018.12.22	2	女	22	20:30:00	摔伤	1	软组织损伤	3	11	建议X检查	轻度
108	2018.12.22	2	女	15	20:42:00	摔伤	1	肌肉损伤	3	11	建议X检查	轻度
109	2018.12.22	2	男	27	21:10:00	摔伤	1	左肩关节脱位	2	8	建议X检查	轻度
110	2018.12.23	2	女	37	11:15:00	脱位	8	左肩关节脱位	2	8	建议X检查复位	轻度
111	2018.12.23	2	女	37	11:10:00	摔伤	1	腰部扭伤	3	4	休息。观察	轻度
112	2018.12.23	2	女	25	11:18:00	摔伤	1	双膝外伤	1	2	云南白药喷雾，观察	轻度
113	2018.12.23	2	女	29	11:50:00	摔伤	1	右侧韧带拉伤	2	5	建议X检查	轻度
114	2018.12.23	2	女	29	14:35:00	摔伤	1	左膝 外伤	1	2	观察，建议CT检查	轻度
115	2018.12.23	2	男	28	15:08:00	摔伤	1	轻微脑震荡	5	1.1	建议CT检查	轻度
116	2018.12.23	2	女	22	18:50:00	摔伤	1	下颌裂伤	4	9	去医院缝合	轻度
117	2018.12.24	2	女	26	13:00:00	摔伤	1	左肘部扭伤	2	7	建议MRI检查	轻度
118	2018.12.24	2	男	27	13:13:00	摔伤	1	右小指骨折	4	3	建议X检查	中度
119	2018.12.24	2	女	29	18:45:00	挫伤	5	右拇指搽伤	1	3	清洗、消毒	轻度
120	2018.12.25	2	男	40	10:00:00	撞伤	2	左髋韧带拉伤	2	4	建议X检查	轻度
121	2018.12.25	2	男	36	13:57:00	撞伤	2	左背部肌肉拉伤	3	8	观察、建议MRI	轻度
122	2018.12.26	2	男	18	10:55:00	摔伤	1	左腕肌肉拉伤	3	3	云南白药喷雾，观察	轻度
123	2018.12.26	2	男	33	14:40:00	摔伤	1	右肩肌肉拉伤	3	8	云南白药喷雾，观察	轻度
124	2018.12.26	2	男	45	19:10:00	摔伤	1	右小腿裂伤	3	5	去医院缝合	轻度
125	2018.12.27	2	女	36	10:37:00	摔伤	1	尾椎外伤	1	4	建议X检查	轻度
126	2018.12.27	2	女	21	14:40:00	碰伤	6	上唇外伤	1	9	建议医院治疗	轻度
127	2018.12.27	2	女	17	15:40:00	摔伤	1	右膝外伤	1	2	云喷、观察	轻度
128	2018.12.28	2	男	3	17:00:00	碰伤	6	头部碰伤	1	1	消毒、清洗包扎	轻度
129	2018.12.28	2	女	38		摔伤	1	右膝血肿	3	2	云南白药喷雾、观察	轻度
130	2018.12.29	2	男	28	10:18:00	摔伤	1	右拇指韧带拉伤	2	3	冷敷、观察	轻度
131	2018.12.29	2	男	35	19:40:00	摔伤	1	左手腕骨折	4	3	建议X检查	中度
132	2018.12.30	2	男	4	10:47:00	碰伤	6	左眼搽伤	1	9	清洗、消毒	轻伤
133	2018.12.30	2	男	14	11:15:00	摔伤	1	双踝韧带扭伤	2	10	云南白药喷雾，观察	轻伤
134	2018.12.30	2	男	49	11:40:00	被撞	2	腰肌扭伤	3	4	建议X检查	轻伤
135	2018.12.30	2	女	39	11:50:00	撞伤	2	左手掌骨粉碎性骨折	4	3	建议X检查	中度
136	2018.12.30	2	男	13	12:20:00	摔伤	1	腰椎压缩性骨折	4	4	建议X检查	中度
137	2018.12.30	2	男	25	13:30:00	摔伤	1	轻微脑震荡	5	1.1	建议CT检查	轻度
138	2018.12.30	2	女	12	13:35:00	摔伤	1	唇部外伤	1	9	清洗，消毒，	轻度
139	2018.12.30	2	女	30	13:35:00	摔伤	1	右髋关节韧带拉伤	2	4	建议MRI检查	轻度
140	2018.12.30	2	男	27	13:55:00	撞伤	2	左臀部肌肉拉伤	3	4	休息。观察	轻度
141	2018.12.30	2	女	26	13:57:00	摔伤	1	右侧胸部软组织损伤	3	6	建议休息，对症治疗	轻度
142	2018.12.30	2	女	40	14:56:00	摔伤	1	右小腿韧带断裂	2	5	建议MRI检查	中度
143	2018.12.30	2	男	27	16:25:00	摔伤	1	胸部软组织损伤	3	6	云南白药喷雾，观察	轻度
144	2018.12.30	2	女	27	16:40:00	摔伤	1	左膝扭伤	2	2	云南白药喷雾，观察	轻度
145	2018.12.30	2	男	22	17:00:00	摔伤	1	右肘扭伤	2	7	云南白药喷雾，观察	轻度
146	2018.12.31	2	男	12	11:00:00	撞伤	2	后背软组织损伤	3	8	建议休息，对症治疗	轻度
147	2018.12.31	2	男	13	11:30:00	撞伤	2	右小腿肌肉拉伤	3	5	建议MRI检查	轻度
148	2018.12.31	2	男	44	11:30:00	摔伤	1	左肩肌肉拉伤	3	8	建议MRI检查	轻度
149	2018.12.31	2	男	30	11:55:00	摔伤	1	左胫骨中上段粉碎性骨折	4	5	建议X检查	中度
150	2018.12.31	2	男	38	12:30:00	摔伤	1	左髋扭伤	2	4	建议MRI检查	轻度
151	2018.12.31	2	男	32	14:00:00	摔伤	1	右背肌肉拉伤	3	8	休息、对症治疗	轻度
152	2018.12.31	2	女	15	14:10:00	撞伤	2	下唇血肿	3	9	清洗，消毒，	轻度
153	2019.1.1	3	男	40	12:18:00	摔伤	1	头部外伤	1	1	清洗、消毒	轻度
154	2019.1.1	3	女	35	12:18:00	摔伤	1	左踝韧带拉伤	2	10	建议MRI检查	轻度
155	2019.1.1	3	女	6	15:55:00	被撞	2	左胫骨肌肉拉伤	3	5	休息，对症治疗	轻度
156	2019.1.1	3	女	34	16:03:00	摔伤	1	左膝韧带拉伤	2	2	休息，对症治疗	轻度
157	2019.1.2	3	男	40	15:40:00	摔伤	1	右膝韧带拉伤	2	2	建议MRI检查	轻度
158	2019.1.3	3	男	21	15:05:00	摔伤	1	脑震荡	5	1.1	建议CT检查	轻度
159	2019.1.4	3	男	11	19:30:00	摔伤	1	腰椎软组织挫伤	3	4	建议CT检查	轻度
160	2019.1.5	3	男	9	11;30	摔伤	1	上腹挫伤	3	6	建议B超检查	轻度
161	2019.1.5	3	男	7	12:25:00	摔伤	1	鼻外伤	1	9	清洗、消毒	轻度
162	2019.1.5	3	男	10	13:45:00	摔伤	1	右膝韧带拉伤	2	2	喷雾，休息、冷敷	轻度
163	2019.1.5	3	女	30	14:25:00	摔伤	1	轻微脑震荡	5	1.1	建议CT检查	轻度
164	2019.1.6	3	女	28	12:00:00	摔伤	1	胸部软组织损伤	3	6	休息、对症治疗	轻度
165	2019.1.6	3	男	29	12:45:00	摔伤	1	左膝韧带拉伤	2	2	休息、对症治疗	轻度
166	2019.1.6	3	男	40	13:05:00	被撞	2	轻微脑震荡	5	1.1	建议CT检查	轻度
167	2019.1.6	3	女	33	13:50:00	摔伤	1	腰肌拉伤	3	4	休息、对症治疗	轻度
168	2019.1.6	3	男	27	14:45:00	摔伤	1	右膝韧带拉伤	2	2	建议MRI检查	轻度
169	2019.1.7	3	女	29	19:40:00	摔伤	1	左膝 韧带拉伤	2	2	建议MRI检查	轻度
170	2019.1.8	3	男	58	10:05:00	撞伤	2	颈椎骨折	4	9	建议CT检查	中度
171	2019.1.8	3	男	21	10:05:00	撞伤	2	左髋韧带拉伤	2	4	建议MRI检查	轻度
172	2019.1.8	3	女	13	11:30:00	摔伤	1	左膝外伤	1	2	建议X检查	轻度
173	2019.1.9	3	女	13	09:10:00	碰伤	6	右眼睑外伤	1	9	清洗、消毒、包扎	轻度
174	2019.1.10	3	女	28	10:15:00	摔伤	1	蛛网膜下腔出血	5	1.1	建议CT检查	中度
175	2019.1.10	3	女	38	11:45:00	摔伤	1	右肩软组织损伤	3	8	建议X检查	轻度
176	2019.1.10	3	男	38	15:15:00	摔伤	1	左踝韧带拉伤	2	10	建议休息	轻度
177	2019.1.11	3	男	54	16:05:00	摔伤	1	轻微脑震荡	5	1.1	观察、建议CT检查	轻度
178	2019.1.11	3	男	19	16:30:00	摔伤	1	腰部肌肉拉伤	3	4	休息、对症治疗	轻度
179	2019.1.11	3	男	20	16:30:00	摔伤	1	左胫骨肌肉拉伤	3	5	休息、对症治疗、喷雾	轻度
180	2019.1.11	3	男	28		撞伤	2	左侧肋骨7、8骨折	4	6	建议X检查	中度
181	2018.1.12	3	男	30	13:12:00	摔伤	1	左踝韧带拉伤	2	10	休息、对症治疗、喷雾	轻度
182	2018.1.12	3	女	34	12:35:00	撞伤	2	右股骨中段骨折	4	5	建议X检查	中度
183	2019.1.12	3	男	25	14:45:00	摔伤	1	腰部肌肉拉伤	3	4	休息、对症治疗、喷雾	轻度
184	2019.1.12	3	男	28	13:50:00	摔伤	1	左手腕软组织损伤	3	3	云南白药喷雾、休息	轻度
185	2019.1.12	3	女	29	15:00:00	摔伤	1	右腓骨远端骨折	4	5	建议X检查	中度
186	2019.1.13	3	女	27	12:55:00	摔伤	1	轻微脑震荡	5	1.1	休息、建议CT检查	轻度
187	2019.1.13	3	女	29	14:05:00	摔伤	1	右胫骨开放性骨折	4	5	建议X检查	中度
188	2019.1.13	3	女	26	14:45:00	摔伤	1	右前臂肌肉拉伤	3	7	建议X检查	轻度
189	2019.1.13	3	女	38	14:05:00	摔伤	1	右膝韧带拉伤	2	2	建议MRI检查	轻度
190	2019.1.14	3	女	25	12:20:00	摔伤	1	疑诊肋骨骨裂	4	6	建议X检查	轻度
191	2019.1.14	3	男	24	13:40:00	摔伤	1	右膝外伤	1	2	休息，对症治疗	轻度
192	2019.1.14	3	男	19	15:15:00	撞伤	2	右髋肌肉拉伤	3	4	休息、对症治疗、喷雾	轻度
193	2019.1.15	3	女	23	10:00:00	摔伤	1	右膝关节扭伤	2	2	喷雾，休息、冷敷	轻度
194	2019.1.15	3	女	12	11:00:00	摔伤	1	右膝关节扭伤	2	2	建议X检查	轻度
195	2019.1.15	3	男	30	12:20:00	摔伤	1	左肋骨搽伤	1	6	清洗、消毒、包扎	轻度
196	2019.1.15	3	男	4	12:55:00	咬伤	8	舌尖裂伤	3	9	上一级医院缝合	轻度
197	2019.1.15	3	男	32	15:00:00	摔伤	1	右锁骨中段骨折	4	6	建议X检查	中度
198	2019.1.15	3	男	48	16:20:00	摔伤	1	左锁骨骨折	4	6	建议X检查	中度
199	2019.1.17	3	男	21	14:12:00	摔伤	1	左手腕外伤	1	3	建议X检查	轻度
200	2019.1.17	3	女	20	12:05:00	摔伤	1	右手掌外伤	1	3	云喷、冷敷	轻度
201	2019.1.17	3	男	24	11:05:00	摔伤	1	右膝韧带拉伤	2	2	建议MRI检查	轻度
202	2019.1.17	3	女	21	16:10:00	摔伤	1	左膝关节扭伤	2	2	云喷、冷敷、观察	轻度
203	2019.1.18	3	男	48	11:00:00	摔伤	1	肋骨骨折	4	6	建议X检查	中度
204	2019.1.18	3	男	31	12:00:00	摔伤	1	左挠骨骨折	4	7	建议X检查	中度
205	2019.1.18	3	男	30	12:15:00	摔伤	1	左锁骨骨折	4	6	建议X检查	中度
206	2019.1.18	3	男	28	13:20:00	摔伤	1	脊髓震荡	5	4	建议X检查	轻度
207	2019.1.18	3	男	24	13:45:00	摔伤	1	胸椎软组织损伤	3	6	建议CT检查	轻度
208	2019.1.18	3	男	27	15:50:00	摔伤	1	左面部擦伤	1	9	清洗、消毒、包扎	轻度
209	2019.1.18	3	女	10	16:10:00	摔伤	1	左侧胸部软组织损伤	3	6	建议X检查	轻度
210	2019.1.19	3	男	44	11:50:00	摔伤	1	左腕关节扭伤	2	3	建议X检查	轻度
211	2019.1.19	3	男	6	12:00:00	撞伤	2	左大腿软组织损伤	3	5	云喷、休息、观察	轻度
212	2019.1.19	3	女	21	12:25:00	摔伤	1	颈部肌肉拉伤	3	9	建议X检查	轻度
213	2019.1.19	3	女	29	13:10:00	摔伤	1	腰大肌软组织挫伤	3	4	建议X检查	轻度
214	2019.1.19	3	男	39	13:20:00	摔伤	1	左膝韧带拉伤	2	2	云喷、建议X线检查	轻度
215	2019.1.19	3	男	16	13:40:00	摔伤	1	右腕肌肉拉伤	3	3	云喷、建议X线检查	轻度
216	2019.1.19	3	男	31	15:05:00	摔伤	1	右锁骨骨折	4	6	建议X检查	中伤
217	2019.1.19	3	女	24	15:20:00	撞伤	2	左胫骨肌肉拉伤	3	5	建议X检查	轻度
218	2019.1.19	3	女	27	16:20:00	摔伤	1	左肩软组织损伤	3	8	云喷、冷敷、观察	轻度
219	2019.1.19	3	男	14	16:45:00	摔伤	1	左小腿肌肉拉伤	3	5	休息、冰敷	轻度
220	2019.1.19	3	男	13	14:00:00	摔伤	1	右掌骨骨折	4	7	建议X检查	中度
221	2019.1.19	3	女	10	19:42:00	撞伤	2	肾挫裂伤	5	6	建议B超检查	轻度
222	2019.1.19	3	女	43	19:42:00	摔伤	1	中切牙缺损	6	9	建议修复	轻度
223	2019.1.19	3	女	31	12:00:00	摔伤	1	右小腿肌肉拉伤	3	5	建议MRI检查	轻度
224	2019.1.19	3	男	25	11:20:00	摔伤	1	右膝韧带拉伤	2	2	建议休息、MRI	轻度
225	2019.1.20	3	女	33	11:20:00	摔伤	1	右外侧踝部扭伤	2	10	休息、冰敷	轻度
226	2019.1.20	3	女	6	11:40:00	摔伤	1	右小腿肌肉拉伤	3	5	建议X检查	轻度
227	2019.1.20	3	女	24	15:55:00	摔伤	1	左肋骨7、8骨折	4	6	建议B超检查	中度
228	2019.1.20	3	女	不详	16:00:00	摔伤	1	右手腕骨折	4	3	建议X检查	中度
229	2019.1.21	3	女	35	19:45:00	摔伤	1	右手掌挫伤	1	3	建议X检查	轻伤
230	2019.1.22	3	男	18	12:15:00	摔伤	1	右肘关节脱位	2	7	建议X检查	轻伤
231	2019.1.23	3	男	8	11:15:00	摔伤	1	左大腿肌肉拉伤	3	5	云喷、建议X线检查	轻伤
232	2019.1.23	3	女	10	12:30:00	摔伤	1	左小腿挫伤	1	5	云喷、建议X线检查	轻伤
233	2019.1.23	3	男	35	15:12:00	摔伤	1	右肘关节脱位	2	7	建议X检查	轻伤
234	2019.1.23	3	女	32	15:40:00	摔伤	1	右肩关节韧带拉伤	2	8	建议X检查	轻伤
235	2019.1.24	3	男	11	11:10:00	摔伤	1	腰肌扭伤	3	4	喷雾，休息	轻伤
236	2019.1.25	3	男	27	10:25:00	撞伤	2	左小腿胫骨下端骨折	4	5	建议X检查	中伤
237	2019.1.25	3	男	12	10:25:00	撞伤	2	左侧前臂骨折	4	7	建议X检查	中伤
238	2019.1.25	3	男	28	10:45:00	摔伤	1	左耳部外伤	1	9	包扎、清创、消毒、CT	轻伤
239	2019.1.25	3	女	22	11:35:00	摔伤	1	右手腕颗粒性骨折	4	3	建议X检查	中伤
240	2019.1.25	3	女	7	12:15:00	撞伤	2	左小腿挫伤	1	5	云喷、建议X线检查	轻伤
241	2019.1.25	3	男	35	13:55:00	摔伤	1	右肩关节脱位	2	8	建议X检查	轻伤
242	2019.1.26	3	女	30	10:24:00	摔伤	1	背部软组织损伤	3	8	建议X检查	轻度
243	2019.1.26	3	男	31	12:30:00	摔伤	1	腰肌扭伤	3	4	休息、喷雾	轻度
244	2019.1.26	3	男	21	11:35:00	被撞	2	鼻出血	6	9	建议X检查	轻度
245	2019.1.26	3	男	16	12:37:00	摔伤	1	左桡骨骨折	4	7	建议X检查	中度
246	2019.1.26	3	女	32	12:45:00	摔伤	1	左膝半月板损伤	2	2	建议MRI检查	轻度
247	2019.1.26	3	男	16	13:38:00	摔伤	1	右肘关节脱位	2	7	建议X检查	轻度
248	2019.1.26	3	男	34	14:22:00	摔伤	1	右肩关节脱位	2	8	建议X检查	轻度
249	2019.1.26	3	男	29	14;35	被撞	2	右股骨软组织损伤	3	5	建议X检查	轻度
250	2019.1.26	3	男	32	15:57:00	摔伤	1	右侧胸壁软组织挫伤	3	6	建议X检查	轻度
251	2019.1.27	3	男	35	11:15:00	摔伤	1	左锁骨骨折	4	6	建议X检查	中度
252	2019.1.27	3	女	30	11;25	摔伤	1	左眼皮下血肿	3	9	冷敷、建议眼底检查	轻度
253	2019.1.27	3	男	28	11:50:00	摔伤	1	双膝关节腔积液	2	2	冷敷、建议医院治疗	轻度
254	2019.1.27	3	女	36	13:20:00	摔伤	1	脑震荡	5	1.1	建议CT检查	轻度
255	2019.1.27	3	男	13	15:57:00	摔伤	1	右锁骨骨折	4	6	建议X检查	中度
256	2019.1.27	3	男	27	16:20:00	摔伤	1	左膝韧带拉伤	2	2	建议MRI检查	轻伤
257	2019.1.28	3	女	28	13:29:00	摔伤	1	左膝部扭伤	2	2	建议X检查	轻伤
258	2019.1.28	3	男	38	13:50:00	摔伤	1	右踝扭伤	2	10	建议X检查	轻伤
259	2019.1.28	3	男	11	15:10:00	摔伤	1	左上臂外伤疼痛	1	7	建议X检查	轻伤
260	2019.1.29	3	男	13	11:00:00	摔伤	1	右臀部皮下血肿	3	4	建议X检查	轻伤
261	2019.1.29	3	男	12	14:50:00	摔伤	1	左锁骨骨折	4	6	建议X检查	轻伤
262	2019.1.29	3	男	10	16:50:00	摔伤	1	左手腕关节损伤	2	3	建议X检查	轻伤
263	2019.1.29	3	男	44	20:00:00	摔伤	1	肩部损伤	2	8	建议X检查	轻伤
264	2019.1.30	3	男	12	11:00:00	摔伤	1	左膝韧带拉伤	2	2	建议MRI检查	轻伤
265	2019.1.30	3	男	25	12:00:00	摔伤	1	前交叉韧带部分撕裂	2	2	建议MRI检查	中伤
266	2019.1.30	3	男	9	11:15:00	摔伤	1	肌肉挫伤	3	11	建议X检查	轻伤
267	2019.1.31	3	男	21	12:00:00	摔伤	1	左膝关节扭伤	2	2	建议MRI检查	轻伤
268	2019.1.31	3	女	33	14:15:00	摔伤	1	左膝关节扭伤	2	2	建议X检查	轻伤
269	2019.1.31	3	男	24	14:00:00	摔伤	1	左腕骨裂	4	3	建议X检查	中伤
270	2019.1.31	3	男	43	19:50:00	摔伤	1	左踝扭伤	2	10	云喷、建议X线检查	轻伤
271	2019.2.1	4	女	29	11:00:00	摔伤	1	左上腹软组织损伤	3	6	建议B超检查	轻伤
272	2019.2.1	4	男	19	11:20:00	摔伤	1	右腕骨折	4	3	云喷、建议X线检查	中度
273	2019.2.1	4	女	28	11:50:00	撞伤	2	左前臂骨折	4	7	建议X线检查	中度
274	2019.2.1	4	女	36	13:20:00	撞伤	2	右膝韧带拉伤	2	2	云喷、建议X线检查	轻伤
275	2019.2.1	4	女	32	11:25:00	撞伤	2	左膝韧带拉伤	2	2	云喷、建议X线检查、休息	轻伤
276	2019.2.1	4	男	20	15:10:00	摔伤	1	右膝韧带损伤	2	2	云喷、观察	轻伤
277	2019.2.1	4	女	38	15:20:00	摔伤	1	右膝皮下血肿	3	2	云喷、观察	轻伤
278	2019.2.2	4	女	25	19:20:00	摔伤	1	左肘部骨裂	4	7	建议X线检查	中度
279	2019.2.2	4	男	10	11:05:00	摔伤	1	左前臂肌肉拉伤	3	7	建议X线检查	轻伤
280	2019.2.2	4	女	7	11:30:00	摔伤	1	脑挫裂伤	5	1.1	建议CT检查	轻伤
281	2019.2.2	4	女	11	11:35:00	摔伤	1	尾椎外伤	1	4	建议X线检查	轻伤
282	2019.2.2	4	女	38	12:30:00	摔伤	1	左拇指拉伤	3	3	建议X线检查	轻伤
283	2019.2.3	4	女	33	12:20:00	摔伤	1	右膝韧带拉伤	2	2	建议X线检查	轻伤
284	2019.2.6	4	男	45	19:10:00	摔伤	1	轻微脑震荡	5	1.1	建议CT检查	轻度
285	2019.2.6	4	女	31	19:50:00	摔伤	1	轻微脑震荡	5	1.1	建议CT检查	轻度
286	2019.2.7	4	男	8	09:10:00	摔伤	1	右小腿肌肉拉伤	3	5	建议MRI检查	轻度
287	2019.2.7	4	女	14	11:10:00	撞伤	2	鼻出血	6	9	清洗、消毒	轻度
288	2019.2.7	4	男	8	12:28:00	被撞	2	左膝韧带拉伤	2	2	建议MRI检查	轻度
289	2019.2.7	4	女	10	19:13:00	撞伤	2	右拇指外伤	1	3	建议X检查	轻度
290	2019.2.7	4	男	31	19:37:00	摔伤	1	右手桡骨骨折	4	7	建议X检查	中度
291	2019.2.7	4	女	28	20;50	摔伤	1	左膝韧带拉伤	2	2	建议MRI检查	轻度
292	2019.2.8	4	男	13	10:25:00	摔伤	1	左侧胸壁软组织损伤	3	6	云南白药喷雾、建议X检查	轻度
293	2019.2.8	4	男	50	12:00:00	摔伤	1	右腕扭伤	2	3	建议X检查、休息	轻度
294	2019.2.8	4	男	51	11:40:00	摔伤	1	右膝扭伤	2	2	建议X检查	轻度
295	2019.2.8	4	女	31	12:24:00	摔伤	1	左膝韧带拉伤	2	2	建议MRI检查	轻度
296	2019.2.8	4	女	28	13:30:00	摔伤	1	右掌肌肉扭伤	3	3	冷敷、喷雾休息	轻度
297	2019.2.8	4	男	29		撞伤	2	胸部软组织损伤	3	6	建议MRI检查	轻度
298	2019.2.8	4	男	44	16:50:00	摔伤	1	右膝韧带拉伤	2	2	云南白药喷雾、建议X检查	轻度
299	2019.2.8	4	男	30	16:55:00	摔伤	1	右肘部韧带拉伤	2	7	建议X检查	轻度
300	2019.2.8	4	女	35	19:00:00	摔伤	1	左手腕骨折	4	3	建议X检查	中度
301	2019.2.9	4	女	30	10:55:00	摔伤	1	右腕扭伤	2	3	建议X检查	轻度
302	2019.2.9	4	男	49	13:35:00	摔伤	1	左肱骨骨折	4	7	建议X检查	中度
303	2019.2.9	4	女	23	14:07:00	摔伤	1	腰部肌肉拉伤	3	4	建议CT检查	轻度
304	2019.2.9	4	男	16	14:40:00	摔伤	1	右手腕挫伤	1	3	云南白药喷雾、建议X检查	轻度
305	2019.2.9	4	男	37	15:40:00	摔伤	1	右膝韧带撕裂	2	2	建议MRI检查	轻度
306	2019.2.9	4	女	40	18:30:00	摔伤	1	右膝韧带拉伤	2	2	建议MRI检查	轻度
307	2019.2.10	4	女	10	10:20:00	摔伤	1	头部外伤	1	1	建议CT检查	轻度
308	2019.2.10	4	女	40	13:00:00	摔伤	1	左膝韧带拉伤	2	2	建议MRI检查	轻度
309	2019.2.10	4	女	32	15:30:00	摔伤	1	颈部外伤	1	9	建议X检查	轻度
310	2019.2.10	4	女	42	19:40:00	摔伤	1	右膝韧带损伤	2	2	云喷、建议MRI检查	轻度
311	2019.2.10	4	男	34	20:35:00	摔伤	1	右腕部关节脱位、扭伤	2	3	建议X检查	轻度
312	2019.2.11	4	男	32	14:40:00	撞伤	2	左膝外伤	1	2	缝合、清创	轻度
313	2019.2.11	4	男	28	15:40:00	摔伤	1	右大腿软组织损伤	3	5	建议X检查	轻度
314	2019.2.12	4	男	25	13:50:00	撞伤	2	右锁骨骨折	4	6	建议X检查	中度
315	2019.2.12	4	女	30	15:33:00	摔伤	1	软组织损伤	3	11	建议X检查	轻度
316	2019.2.12	4	女	20	21:00:00	摔伤	1	韧带拉伤	2	5	建议MRI检查	轻度
317	2019.2.13	4	女	43	11:00:00	摔伤	1	尾椎外伤	1	4	建议X检查	轻度
318	2019.2.13	4	女	43	12:05:00	摔伤	1	左膝韧带拉伤	2	2	建议MRI检查	轻度
319	2019.2.13	4	男	22	14:20:00	摔伤	1	肋骨骨折、气胸	4	6	建议X检查	中度
320	2019.2.14	4	男	33	11:00:00	摔伤	1	唇部外伤	1	9	清洗、消毒	轻度
321	2019.2.14	4	男	41	14:10:00	摔伤	1	左锁骨骨折	4	6	建议X检查	中度
322	2019.2.14	4	男	41	15:40:00	摔伤	1	肋骨骨折	4	6	建议X检查	中度
323	2019.2.14	4	女	24	15:00:00	摔伤	1	左膝韧带拉伤	2	2	建议MRI检查	轻度
324	2019.2.14	4	女	28	16:30:00	被撞	2	腰部软组织损伤	3	4	建议B超检查	轻度
325	2019.2.14	4	女	12	20:00:00	摔伤	1	软组织损伤	3	11	云喷、建议X线检查	轻度
326	2019.2.15	4			11:55:00	摔伤	1	颅骨骨折	4	1	建议X线、CT检查	中度
327	2019.2.15	4	男	31	14:20:00	摔伤	1	左肩胛软组织损伤	3	8	建议X检查	轻度
328	2019.2.15	4	女	5	15:30:00	摔伤	1	右小腿软组织损伤	3	5	建议X检查	轻度
329	2019.2.16	4	男	11	11:30:00	摔伤	1	左脚外踝扭伤	2	10	建议X检查	轻度
330	2019.2.16	4	男	29	11:40:00	摔伤	1	左脚外踝扭伤	2	10	云喷、冰敷	轻度
331	2019.2.16	4	男	43	12:35:00	摔伤	1	左手掌骨折	4	3	建议X检查	中度
332	2019.2.16	4	女	38	12:35:00	撞伤	2	脑震荡	5	1.1	建议CT检查	轻度
333	2019.2.16	4	女	33	12:57:00	摔伤	1	尾椎外伤	1	4	建议X检查	轻度
334	2019.2.16	4	女	33	13:15:00	摔伤	1	胸椎骨折	4	6	建议X检查	中度
335	2019.2.16	4	女	27	13:40:00	摔伤	1	右小腿肌肉拉伤	3	5	云喷、按摩	轻度
336	2019.2.16	4	女	23	14:55:00	摔伤	1	左小腿骨折	4	5	建议X检查	中度
337	2019.2.16	4	女	13	15:03:00	摔伤	1	额头血肿	3	1	建议CT检查	轻度
338	2019.2.16	4	女	28	15:56:00	撞伤	2	轻微脑震荡	5	1.1	吸氧、建议CT检查	轻度
339	2019.2.16	4	女	32	16:50:00	摔伤	1	双膝皮下血肿	3	2	冷敷、喷雾休息	轻度
340	2019.2.17	4	女	32	12:30:00	撞伤	2	胸部软组织损伤	3	6	建议X检查	轻度
341	2019.2.17	4	男	9	10:10:00	摔伤	1	右肘扭伤	2	7	建议X检查	轻度
342	2019.2.17	4	女	38	13:35:00	摔伤	1	韧带撕裂、半月板损伤、积液	2	2	建议MRI检查	中度
343	2019.2.17	4	男	14	14:20:00	摔伤	1	唇部外伤	1	9	建议上一级医院处理	轻度
344	2019.2.17	4	女	33	15:40:00	摔伤	1	软组织损伤	3	11	建议X检查	轻度
345	2019.2.17	4	男	30	13:30:00	摔伤	1	左桡骨远端骨折	4	7	建议X检查	中度
346	2019.2.19	4	女	11	13:50:00	摔伤	1	右小腿软组织损伤	3	5	建议X检查	轻度
347	2019.2.20	4	男	12	11:30:00	摔伤	1	轻微脑震荡	5	1.1	建议CT检查	轻度
348	2019.2.21	4	女	15	11:10:00	摔伤	1	轻微脑震荡	5	1.1	建议CT检查	轻度
349	2019.2.21	4	女	18	12:20:00	摔伤	1	软组织损伤	3	11	建议X检查	轻度
350	2019.2.21	4	男	27	12:40:00	摔伤	1	左小腿腓骨骨折	4	5	建议X检查	中度
351	2019.2.21	4	男	15	13:50:00	摔伤	1	左锁骨骨折	4	6	建议X检查	中度
352	2019.2.21	4	男	10	14:03:00	摔伤	1	左肘部骨折	4	7	建议X检查	中度
353	2019.2.21	4	女	11	15:35:00	撞伤	2	软组织损伤	3	11	建议X检查	轻度
354	2019.2.22	4	女	12	10:05:00	摔伤	1	左肘部软组织损伤	3	7	建议X检查	轻度
355	2019.2.23	4	女	19	10:26:00	摔伤	1	左肱骨粉碎性骨折	4	7	建议X检查	中度
356	2019.2.23	4	男	30	11:05:00	撞伤	2	软组织损伤	3	11	休息、喷雾	轻度
357	2019.2.23	4	女	35	11:05:00	撞伤	2	软组织损伤	3	11	休息、喷雾	轻度
358	2019.2.23	4	女	30	12:10:00	摔伤	1	脑震荡	5	1.1	建议CT检查	轻度
359	2019.2.23	4	男	9	12:19:00	摔伤	1	后交叉韧带拉伤	2	2	建议MRI检查	轻度
360	2019.2.23	4	女	23	12:20:00	摔伤	1	左眼血肿	3	9	建议X检查	轻度
361	2019.2.23	4	女	30	13:00:00	摔伤	1	右膝韧带拉伤	2	2	建议MRI检查	轻度
362	2019.2.23	4	女	25	13:50:00	摔伤	1	右手扭伤	2	3	建议X检查	轻度
363	2019.2.23	4	女	38	14:10:00	摔伤	1	左手腕血肿	3	3	建议X检查	轻度
364	2019.2.23	4	男	37	15:40:00	撞伤	2	软组织损伤	3	11	建议X检查	轻度
365	2019.2.23	4	女	33	16:20:00	摔伤	1	左前臂骨折	4	7	建议X检查	中度
366	2019.2.23	4	男	27	19:30:00	摔伤	1	左肘外伤	1	7	消毒、包扎必要时X线检查	轻度
367	2019.2.23	4	女	27	20:20:00	摔伤	1	软组织损伤	3	11	云喷、建议X线检查	轻度
368	2019.2.23	4	男	7	20:55:00	摔伤	1	肌肉损伤	3	11	建议X检查	轻度
369	2019.2.24	4	女	49	09:10:00	摔伤	1	左膝关节韧带拉伤	2	2	建议MRI检查、冰敷	轻度
370	2019.2.24	4	男	35	11:26:00	摔伤	1	左踝扭伤	2	10	建议X检查	轻度
371	2019.2.24	4	女	27	12:00:00	撞伤	2	左前臂软组织损伤	3	7	建议X检查	轻度
372	2019.2.24	4	女	29	13:40:00	摔伤	1	背部撞伤	3	8	云喷、建议X线检查	轻度
373	2019.2.24	4	女	11	13:40:00	摔伤	1	左臂肌肉拉伤	3	7	建议X检查	轻度
374	2019.2.24	4	男	39	16:29:00	摔伤	1	左侧肋骨骨裂	4	6	建议X检查	中度
375	2019.2.25	4	女	42	12:30:00	摔伤	1	右肩韧带拉伤	2	8	建议X检查	轻度
376	2019.2.25	4	女	40	20:30:00	摔伤	1	右腕部骨折	4	3	建议X检查	中度
377	2019.2..27	4	女	16	11:42:00	摔伤	1	左膝韧带拉伤	2	2	建议MRI检查	轻度
378	2019..2.27	4	女	23	13:50:00	摔伤	1	右腕部骨裂	4	3	建议X检查	中度
379	2019.2.27	4	女	37	18:10:00	摔伤	1	右膝韧带拉伤	2	2	建议MRI检查	轻度
380	2019.2.27	4	女	32	18:40:00	扎伤	3	左足钉子扎伤	6	10	清创、建议注射TAT	轻度
381	2019.2.27	4	女	36	20:50:00	摔伤	1	右肩关节脱位	2	8	建议X检查	轻度
382	2019.2.28	4	女	18	10:50:00	摔伤	1	左小腿软组织损伤	3	5	建议X检查	轻度
383	2019.2.28	4	女	17	11:10:00	摔伤	1	双膝软组织损伤	3	2	建议X检查	轻度
384	2.19.2.28	4	女	42	12:10:00	摔伤	1	右锁骨骨折	4	6	建议X检查	中度
385	2019.2.28	4	男	41	12:10:00	摔伤	1	右膝外伤	1	2	消毒、包扎	轻度
386	2019.2.28	4	女	15	14:05:00	摔伤	1	轻微脑震荡	5	1.1	观察、头部CT	轻度
387	2019.2.28	4	男	16	14:30:00	摔伤	1	有眼擦伤	1	9	清创、观察	轻度
388	2019.2.28	4	女	13	18:50:00	摔伤	1	右肱骨骨折	4	7	建议X检查	中度
389	2019.3.1	5	男	31	15:15:00	摔伤	1	左胫腓骨骨折	4	5	建议X线检查	中度
390	2019.3.1	5	男	26	18:10:00	摔伤	1	软组织损伤	3	11	建议X线检查	轻度
391	2019.3.1	5	男	26	16:55:00	摔伤	1	软组织损伤	3	11	建议X线检查	轻度
392	2019.3.2	5	男	27	10:53:00	摔伤	1	左膝韧带拉伤	2	2	休息、喷雾	轻度
393	2019.3.2	5	男	31	11:30:00	摔伤	1	右肱骨骨折	4	7	建议X线检查	中度
394	2019.3.2	5	女	36	11:40:00	摔伤	1	左膝韧带拉伤	2	2	建议X线检查	轻度
395	2019.3.2	5	男	39	13:40:00	摔伤	1	韧带损伤	2	5	建议MRI检查	轻度
396	2019.3.2	5	男	43	14:00:00	摔伤	1	韧带损伤	2	5	建议X线检查	轻度
397	2019.3.2	5	男	52	14:30:00	摔伤	1	股骨骨折	4	5	建议X线检查	中度
398	2019.3.2	5	男	27	18:50:00	摔伤	1	下颌部擦伤、轻微脑震荡	5	1.1	清创、观察、建议CT检查	轻度
399	2019.3.3	5	女	39	11:10:00	摔伤	1	双膝韧带拉伤	2	2	云喷、休息	轻度
400	2019.3.3	5	男	35	11:15:00	摔伤	1	右腕桡骨骨裂	4	3	建议X线检查	中度
401	2019.3.3	5	男	5	12:30:00	撞伤	2	脑震荡	5	1.1	建议CT检查	轻度
402	2019.3.3	5	男	23	09:25:00	摔伤	1	胸椎外伤	1	6	建议X线检查	轻度
403	2019.3.3	5	男	9	12:25:00	摔伤	1	软组织损伤	3	11	建议X线检查	轻度
404	2019.3.5	5	男	17	09:25:00	摔伤	1	唇部裂伤	3	9	建议缝合	轻度
405	2019.3.5	5	男	36	15:26:00	被撞	2	牙齿松动	6	9	建议口腔医院治疗	轻度
406	2019.3.7	5	女	17	10:25:00	摔伤	1	左锁骨骨折	4	6	建议X线检查	中度
407	2019.3.7	5	男	29	12:05:00	摔伤	1	右肩脱臼	2	8	建议X线检查	轻度
408	2019.3.7	5	男	29	12:16:00	摔伤	1	左前臂粉碎性骨折	4	7	建议X线检查	中度
409	2019.3.8	5	男	37	21:25:00	摔伤	1	左小腿裂伤	3	5	清创、缝合、建议X线	轻度
410	2019.3.9	5	男	37	15:26:00	摔伤	1	软组织损伤	3	11	建议X线检查	轻度
411	2019.3.9	5	女	31	12:05:00	摔伤	1	脑震荡	5	1.1	建议头部CT	轻度
412	2019.3.10	5	男	36	12:25:00	摔伤	1	手指骨裂	4	3	建议X线检查	中度
413	2019.3.10	5	男	33	11:30:00	摔伤	1	软组织损伤	3	11	建议X线检查	轻度
414	2019.3.10	5	男	30	12:55:00	摔伤	1	脑震荡	5	1.1	建议CT检查	轻度
415	2019.3.13	5	女	29	14:30:00	摔伤	1	左踝部骨折	4	10	建议X线检查	中度
416	2019.3.16	5	男	30	13:05:00	摔伤	1	脑震荡	5	1.1	观察、休息	轻度
417	2019.3.16	5	男	30	13:05:00	摔伤	1	软组织损伤	3	11	建议X线检查	轻度
418	2019.3.16	5	女	33	15:40:00	摔伤	1	韧带拉伤	2	5	建议X线检查	轻度
419	2019.3.16	5	女	23	19:40:00	摔伤	1	脑出血	5	1.1	建议CT检查	中度
420	2019.3.17	5	男	12	16:20:00	摔伤	1	左髋骨骨折	4	4	建议X线检查	中度
421	2019.3.23	5	男	36	11:00:00	摔伤	1	左锁骨骨折	4	6	建议X线检查	中度
422	2019.3.23	5	男	26	12:50:00	摔伤	1	左肩关节脱位	2	8	建议X线检查	轻度
423	2019.3.23	5	女	39	14:12:00	摔伤	1	左桡骨骨折	4	7	建议X线检查	中度
424	2019.3.23	5	男	31	14:12:00	摔伤	1	肌肉拉伤	3	11	建议X线检查	轻度
425	2019.3.24	5	男	28	11:30:00	摔伤	1	软组织挫伤	3	11	建议X线检查	轻度
426	2019.3.24	5	男	42	11:40:00	摔伤	1	左锁骨骨折	4	6	建议X线、B超检查	中度
427	2019.3.24	5	女	44	13:05:00	摔伤	1	左膝部韧带拉伤	2	2	建议MRI检查	轻度
428	2019.3.30	5	男	32	14:15:00	摔伤	1	左胸肋骨骨折	4	6	建议X检查	中度
429	2019.3.30	5	男	25	15:45:00	摔伤	1	背部挫伤	3	8	建议X检查	轻度
430	2019.3.30	5	男	34	16:20:00	摔伤	1	尺骨粉碎性骨折	4	7	建议X检查	中度
431	2019.3.31	5	女	29	10:45:00	撞伤	2	软组织损伤	3	11	建议X检查	轻度
432	2019.3.31	5	男	39	14:20:00	摔伤	1	软组织损伤	3	11	建议X检查	轻度
1	2018-11-01	11	男	23						2
2	2018-11-01	11	女	31	09:50:00					1.1
3	2018-11-02	11	女	31	10:50:00					10
4	2018-11-03	11	男	41	11:00:00					4
5	2018-11-03	11	男	30	10:40:00					3
6	2018-11-03	11	男	21	13:35:00					4
7	2018-11-03	11	男	30	14:30:00					5
8	2018-11-03	11	男	38	14:50:00					7
212	2018-12-22	12	女	12	10:50:00					1
10	2018-11-03	11	女	29	14:20:00					2
11	2018-11-03	11	女	52	13:40:00					5
12	2018-11-03	11	男	27
13	2018-11-03	11	男	34	12:00:00
14	2018-11-04	11	女	30	10:30:00					8
15	2018-11-04	11	女	53	10:30:00					2
16	2018-11-04	11	男	41	10:35:00					5
17	2018-11-04	11	女	30	10:35:00					5
18	2018-11-04	11	男	35
19	2018-11-06	11	女	33	11:00:00					2
20	2018-11-07	11	女	28						7
21	2018-11-07	11	女	24	10:00:00					5
22	2018-11-09	11	男	37	11:10:00					5
23	2018-11-09	11	男	21	11:10:00
24	2018-11-09	11	女	31	11:20:00					3
25	2018-11-09	11	男	32	11:10:00					6
26	2018-11-10	11	男	34	16:20:00					9
27	2018-11-10	11	男	24	11:18:00					6
28	2018-11-10	11	男	31	14:00:00					1，7
250	2018-12-30	12	男	8	12:30:00					1
30	2018-11-10	11	男	30	11:30:00
31	2018-11-11	11	男	28	10:50:00					4
32	2018-11-11	11	男	25	10:10:00					3
33	2018-11-11	11	男	35	11:20:00					4
34	2018-11-11	11	男	32	08:30:00					4
35	2018-11-11	11	男	36	09:45:00					2
36	2018-11-11	11	男	27	09:20:00					2
37	2018-11-11	11	男	26	10:46:00					5
38	2018-11-11	11	男	47	10:46:00					1
39	2018-11-12	11	女	27	11:40:00					4
40	2018-11-13	11	女	45	11:39:00					3
41	2018-11-13	11	女	31	11:50:00
42	2018-11-13	11	女	42	11:50:00					2
43	2018-11-13	11	女	28	11:50:00					3，5
44	2018-11-13	11	男	60	12:10:00					8
45	2018-11-13	11	女	31	12:00:00					1
46	2018-11-16	11	男	24	16:30:00					1
47	2018-11-16	11	男	35	10:10:00					1
48	2018-11-16	11	男	32	10:00:00					2
49	2018-11-17	11	男	20	13:10:00					3
50	2018-11-17	11	女	25	11:30:00					3
51	2018-11-17	11	男	26	12:00:00					8
52	2018-11-17	11	女	35	11:30:00					2
53	2018-11-17	11	男	28	11:30:00
54	2018-11-17	11	女	29	11:30:00					3
55	2018-11-17	11	男	29	12:00:00					8
56	2018-11-17	11	男	36	11:00:00					2
57	2018-11-17	11	女	33	15:35:00					1，6
58	2018-11-17	11	男	28	16:00:00					3
59	2018-11-17	11	男	44	14:30:00					2
60	2018-11-17	11	男	33	16:00:00					7
265	2018-12-31	12	男	8	13:00:00					1
62	2018-11-18	11	女	30	14:05:00					4
63	2018-11-18	11	女	29	10:00:00					8
64	2018-11-18	11	女	31	12:00:00					6
65	2018-11-18	11	男	39	14:40:00					4
66	2018-11-18	11	女	34	10:50:00					2
67	2018-11-20	11	男	15						3
68	2018-11-20	11	男	26	12:00:00					3
69	2018-11-20	11	女	43	15:30:00					1，8
70	2018-11-20	11	女	21	15:30:00
71	2018-11-23	11	女	60	09:20:00					7
72	2018-11-24	11	男	24	12:54:00					2
73	2018-11-24	11	男	43	15:40:00					2
74	2018-11-24	11	女	26	15:00:00					2
75	2018-11-24	11	男	50	15:30:00					3
290	2019-01-06	1	女	12	11:50:00					1
293	2019-01-06	1	男	6	09:20:00					1
78	2018-11-25	11	女	26	15:00:00					10
79	2018-11-25	11	男	32	16:25:00					2
80	2018-11-25	11	女	36	15:10:00					1
81	2018-11-25	11		28	11:40:00					6，8
82	2018-11-25	11	男	35	10:29:00
83	2018-11-25	11	女	28						3
84	2018-11-25	11	女	37	15:45:00					4
85	2018-11-25	11	男	40	15:10:00					8
86	2018-11-25	11	男	44	11:00:00					1
87	2018-11-25	11	男	24	10:29:00					4
88	2018-11-25	11	男	40	10:45:00					8
89	2018-11-25	11	男	48	11:40:00					7
90	2018-11-25	11	男	33
91	2018-11-26	11	男	59	14:10:00					2
92	2018-11-26	11	女	26	13:45:00					3
93	2018-11-26	11	男	49	13:00:00					6
94	2018-11-27	11	男	36	09:30:00					1
95	2018-11-27	11	男	57	11:00:00					5
96	2018-11-28	11	男	37	12:45:00					2
97	2018-11-28	11	男	35	09:40:00					10
98	2018-11-28	11	女		15:00:00					2
99	2018-11-29	12	女	33						7
100	2018-11-29	12	男	20	16:00:00					3
101	2018-11-29	12	男	38	14:00:00					6
102	2018-11-30	11	男	27	14:50:00					6
103	2018-11-30	12	男	31	15:00:00					2
104	2018-11-30	11	女	30						9
105	2018-12-01	12	男	28	16:40:00					5
106	2018-12-01	12	男	29	15:20:00					8
107	2018-12-01	12	男	25	15:10:00					10
108	2018-12-01	12	男	30	15:30:00					2
109	2018-12-01	12	男	39	15:25:00					2
110	2018-12-01	12	男	30	11:30:00					5
111	2018-12-01	12	男	35	12:15:00					3
112	2018-12-01	12	女	36	11:25:00					1
113	2018-12-01	12	男	28	14:00:00					6
114	2018-12-01	12	男	28
115	2018-12-01	12	女	43	11:00:00					2
116	2018-12-01	12	男	36	15:29:00					2
117	2018-12-01	12	男	40	15:30:00					8
118	2018-12-01	12	男	20	10:40:00					6
119	2018-12-01	12	男							6
120	2018-12-02	12	男	30	11:50:00					4
121	2018-12-02	12	男	44	08:30:00					6
122	2018-12-02	12	女	39	08:30:00					8
123	2018-12-02	12	男	46	14:20:00					3
124	2018-12-02	12	女	30	09:00:00					7
125	2018-12-02	12	男	45	11:00:00					10
126	2018-12-02	12	女	29	10:00:00					4
127	2018-12-02	12	男	39	10:10:00					10
128	2018-12-02	12	男	29	09:46:00					10
440	2019-02-01	2	女	12	11:00:00					1
130	2018-12-03	12	男	51	11:30:00					2
131	2018-12-04	12	男	31	13:30:00					8
132	2018-12-04	12	女	37	14:20:00					5
133	2018-12-04	12	男	55	10:40:00					3
134	2018-12-05	12	女	52	09:00:00					5
135	2018-12-05	12	女	29	14:30:00					6
136	2018-12-05	12	男	30	12:01:00					7
137	2018-12-05	12	女	32	12:01:00					6
138	2018-12-06	12	男	19	11:35:00					7
139	2018-12-06	12	男	25	15:30:00
140	2018-12-06	12	男	54
141	2018-12-06	12	男	48	10:20:00					3
142	2018-12-07	12	男	35	14:30:00					1.1
143	2018-12-07	12	男	26	14:30:00					6
144	2018-12-07	12	女	48	12:00:00					2
145	2018-12-08	12	男	38	11:00:00					1
146	2018-12-08	12	男	26	15:00:00					7
473	2019-02-07	2	男	10	14:30:00					1
148	2018-12-08	12	男	22	12:37:00					4
149	2018-12-08	12	女	39	14:58:00					10
150	2018-12-09	12	男	46	14:00:00					3
151	2018-12-09	12	女	32	12:20:00					4
152	2018-12-09	12	男	30	11:17:00					1
153	2018-12-09	12	女	35	13:30:00					2
154	2018-12-09	12	女	22	13:00:00					3
549	2019-02-21	2	男	11	10:20:00					1
156	2018-12-09	12	男	30	11:30:00
157	2018-12-09	12	男	51						1
158	2018-12-09	12	男	53	12:10:00					6
159	2018-12-11	12	男	22	11:00:00					2
160	2018-12-11	12	男	42	12:11:00					5
161	2018-12-11	12	男	36	11:00:00					4
162	2018-12-12	12	女	19	11:25:00					5
163	2018-12-12	12	女	27	11:25:00					8
164	2018-12-12	12	男	22	10:40:00					4
165	2018-12-13	12	男	45	13:30:00					10
166	2018-12-13	12	男	41	13:30:00					3
167	2018-12-14	12	男	28	13:10:00					7
168	2018-12-14	12	女	40	16:50:00					2
169	2018-12-14	12	男	47	14:50:00					2
170	2018-12-14	12	女	27	11:30:00					2
171	2018-12-14	12	男	62	10:35:00					3，5
172	2018-12-14	12	男	50	12:25:00					10
173	2018-12-15	12	女	27	16:00:00					2
174	2018-12-15	12	男	23	14:40:00					2
175	2018-12-15	12	女	24	15:00:00					5
176	2018-12-15	12	男	22	12:57:00					7
177	2018-12-15	12	女	37	11:10:00					7
178	2018-12-15	12	男	28	15:10:00					3
179	2018-12-15	12	男	36	09:55:00					10
180	2018-12-15	12	男							6
181	2018-12-15	12	男	21						2
182	2018-12-16	12	女	22	13:50:00					8
183	2018-12-16	12	女	27	13:30:00					3
184	2018-12-16	12	女	28	11:00:00					3
185	2018-12-16	12	女	41	11:30:00					1
221	2018-12-24	12	女	10	15:00:00					2
187	2018-12-16	12	男	56	11:00:00
188	2018-12-17	12	男	41	11:20:00					2
189	2018-12-17	12	男	41	12:37:00					8
190	2018-12-17	12	男	57	12:30:00					10
191	2018-12-17	12	女	50	09:50:00					9
192	2018-12-18	12	女	23	14:07:00					6
193	2018-12-19	12	男	23	12:00:00					2，6
194	2018-12-19	12	男	22	10:00:00					2
195	2018-12-20	12	女	42	09:26:00					2
196	2018-12-20	12	男	20	16:00:00					9
197	2018-12-20	12	男	53	08:48:00					2
198	2018-12-20	12	女	26	16:00:00					5
199	2018-12-20	12	女							5
200	2018-12-21	12	男	58	15:00:00					6
201	2018-12-21	12	女	23	11:40:00					8
202	2018-12-21	12	男	45	11:00:00					3
203	2018-12-21	12	女	32	12:30:00					5，7
204	2018-12-21	12	男	30
205	2018-12-22	12	女	20	09:30:00					1
206	2018-12-22	12	女	42	13:00:00					10
207	2018-12-22	12	男	26	09:00:00					8
208	2018-12-22	12	男	20	15:00:00					6
209	2018-12-22	12	男	49	09:30:00					6
210	2018-12-22	12	男	13	14:00:00					8
211	2018-12-22	12	女	27	09:20:00					9
442	2019-02-01	2	男	12	11:10:00					2
213	2018-12-22	12	女	30	10:50:00					2
214	2018-12-22	12	女	18	09:40:00					5
215	2018-12-22	12	女	29						5
216	2018-12-22	12	男	32	15:00:00					8
217	2018-12-23	12	男	24	12:20:00					8
218	2018-12-23	12	男	39	17:00:00					10
219	2018-12-24	12	女	21	16:00:00					2
220	2018-12-24	12	男	32	15:20:00					9
667	2019-03-16	3	男	11	15:30:00					2
222	2018-12-25	12	女		16:30:00					3
223	2018-12-25	12	男	16	10:35:00					6
224	2018-12-25	12	男	36	15:40:00					8
225	2018-12-25	12	男	59	10:00:00					5
226	2018-12-25	12	女	44	11:40:00					3
227	2018-12-26	12	女	19	14:10:00					3
228	2018-12-26	12	男	28	14:30:00					6
229	2018-12-26	12	男	19	11:40:00					3
230	2018-12-26	12	男	21	14:10:00					6
231	2018-12-26	12	男	53	15:05:00					6
232	2018-12-27	12	女	25	11:50:00					2
233	2018-12-27	12	男	18	10:50:00					6
234	2018-12-27	12	女	28						6，9
235	2018-12-28	12	女		11:30:00					2
236	2018-12-28	12	男	29	14:20:00					8
237	2018-12-28	12	女	48	15:20:00					1
238	2018-12-28	12	男	22	15:20:00					5
239	2018-12-28	12	男	18	14:20:00					2
240	2018-12-28	12	男	59	15:50:00					5
241	2018-12-29	12	男	27	10:19:00					10
242	2018-12-29	12	男	44	14:30:00					2
243	2018-12-29	12	女	30						6
244	2018-12-29	12	女	21	16:00:00					1
245	2018-12-29	12	男	28	16:00:00
246	2018-12-29	12	男	49	12:25:00					6
247	2018-12-29	12	男	50	12:25:00
248	2018-12-30	12	女	26	17:00:00					2
249	2018-12-30	12	女	26	17:00:00					10
744	2019-04-06	4	男	7	14:40:00					2
251	2018-12-30	12	女	30	15:00:00					6
252	2018-12-30	12	女	21	10:30:00					7
253	2018-12-30	12	女	36	12:00:00					2
254	2018-12-30	12	男	42	12:40:00
255	2018-12-30	12	女	31	16:10:00					4
256	2018-12-30	12	女	37	12:40:00					7
257	2018-12-30	12	男	36	16:00:00					5
258	2018-12-30	12	女	23	15:00:00					9
259	2018-12-30	12	男	37	16:15:00					4
260	2018-12-30	12	男	31	16:15:00
261	2018-12-31	12	女	32	10:00:00					6
262	2018-12-31	12	女	28	16:50:00					8
263	2018-12-31	12	女	23	12:30:00					7
264	2018-12-31	12	男	25	15:40:00					4
277	2019-01-01	1	男	9	10:30:00					3
266	2018-12-31	12	男	29	13:00:00
267	2018-12-31	12	女	25	14:35:00					10
268	2018-12-31	12	女	32	15:30:00					8
269	2018-12-31	12	男	38	15:30:00
270	2018-12-31	12	男	40	10:30:00					3
271	2018-12-31	12	男	37	10:50:00					9
272	2018-12-31	12	男	29	10:50:00					1，9
273	2019-01-01	1	男	37	15:10:00					5
274	2019-01-01	1	女	31	11:15:00					4
340	2019-01-16	1	男	11	14:00:00					3
276	2019-01-01	1	女	47	14:06:00					2，5
417	2019-01-28	1	男	11	10:50:00					3
550	2019-02-21	2	男	11	14:30:00					3
279	2019-01-01	1	女	46	10:20:00					7
280	2019-01-01	1	女	43	10:30:00					1
281	2019-01-01	1	女	33	14:40:00					5
282	2019-01-01	1	女	24	15:00:00					7
283	2019-01-02	1	女	23	16:00:00					8
284	2019-01-02	1	女	38	15:55:00
285	2019-01-02	1	男	43	15:55:00					3
286	2019-01-05	1	女	27	10:31:00					7
287	2019-01-05	1	男	37	11:30:00					4
288	2019-01-05	1	男	35	09:50:00					3
289	2019-01-06	1	男	29	12:00:00					2
9	2018-11-03	11	女	7	12:00:00					4
291	2019-01-06	1	女	40						1
292	2019-01-06	1	男	40
77	2018-11-24	11	男	6	11:55:00					5
294	2019-01-08	1	女	23	13:35:00					2
295	2019-01-08	1	女	20	13:35:00					2
296	2019-01-08	1	男	25	12:10:00					10
297	2019-01-08	1	女	55	13:40:00					5
298	2019-01-08	1	男	41	11:25:00					6
299	2019-01-09	1	女	41	13:00:00					2
300	2019-01-09	1	男	62	11:00:00					7
301	2019-01-09	1	女	25	16:10:00					1
302	2019-01-09	1	男	36	14:40:00					1，4
303	2019-01-09	1	女	55	13:25:00					7
304	2019-01-09	1	男	20	15:00:00					5
305	2019-01-09	1	女	27	14:40:00					5
306	2019-01-09	1	男	41	14:20:00					7
307	2019-01-09	1	男	26	14:40:00
308	2019-01-10	1	女	22	13:35:00					2
309	2019-01-10	1	男	22	16:40:00					6
310	2019-01-10	1	女	40	12:10:00					2
311	2019-01-10	1	男		11:10:00					2
312	2019-01-10	1	男	22	16:40:00					10
313	2019-01-10	1	男	60	12:00:00					2
314	2019-01-10	1	男	14	13:44:00					1
315	2019-01-10	1	男	25	09:50:00					8
316	2019-01-11	1	女	45	15:00:00					5
317	2019-01-12	1	男	31	14:30:00					2
318	2019-01-12	1	男	29	16:20:00					10
319	2019-01-12	1	男	26	14:30:00					1
320	2019-01-12	1	女	55	10:31:00					3
321	2019-01-12	1	女	26	12:10:00					3
322	2019-01-12	1	男	21	12:00:00					2
323	2019-01-12	1	女	28	15:30:00					2
324	2019-01-12	1	男	24	12:10:00					3
325	2019-01-13	1	女	19	10:29:00					10
326	2019-01-14	1	男	13	12:00:00					3
327	2019-01-14	1	女	22	08:50:00					9
328	2019-01-14	1	男	28	08:50:00					9
329	2019-01-14	1	男	51	10:50:00					3
330	2019-01-15	1	女	23	15:20:00					8
331	2019-01-15	1	女	21						1
332	2019-01-15	1	女	25	10:00:00					9，5
333	2019-01-15	1	男	35	10:00:00					4
334	2019-01-15	1	男	13	12:00:00					9
335	2019-01-16	1	男	20	15:05:00
336	2019-01-16	1	男	13	14:00:00					3
337	2019-01-16	1	男	29	16:00:00					6
338	2019-01-16	1	女	73	15:05:00					2
339	2019-01-16	1	男	60	10:20:00					4
398	2019-01-25	1	男	7	15:20:00					5
341	2019-01-17	1	男	22	11:00:00					1
342	2019-01-17	1	女	18	15:10:00					2
343	2019-01-17	1	男	50	15:10:00
344	2019-01-17	1	男	35	12:00:00					4
345	2019-01-17	1	男	21	15:10:00					2
346	2019-01-17	1	男	44	14:40:00					5，8
347	2019-01-17	1	男	23	14:40:00					9
428	2019-01-29	1	男	9	14:00:00					5
451	2019-02-02	2	男	8	16:10:00					5
350	2019-01-18	1	男	19	11:27:00					2
351	2019-01-18	1	男		16:21:00					5
352	2019-01-19	1	男	26	15:00:00					6
353	2019-01-19	1	女	38	12:30:00					10
354	2019-01-19	1	男	25	16:00:00					2
355	2019-01-19	1	男	34	12:00:00					3
356	2019-01-19	1	男	35	14:00:00					6
470	2019-02-07	2	男	5						5
358	2019-01-19	1	女	36	14:00:00					2
359	2019-01-19	1	男	37	10:00:00					8
596	2019-02-25	2	女	5	14:00:00					5
685	2019-03-17	3	女	7	09:30:00					5
362	2019-01-19	1	女	38	13:00:00					1
363	2019-01-20	3	男	23	13:00:00					2
364	2019-01-20	1	男	14	10:50:00					2
365	2019-01-20	1	女	23	14:00:00					1
366	2019-01-20	1	女	47	11:30:00					10
367	2019-01-20	1	男	29	14:50:00					8
368	2019-01-20	1	男	43	16:20:00					5
369	2019-01-20	1	男	37	10:37:00					8
370	2019-01-20	1	女	24	13:00:00					6
371	2019-01-20	1	男	35	13:30:00					1
372	2019-01-20	1	女	48	14:10:00					2
373	2019-01-20	1	女	17	12:00:00					4
737	2019-04-06	4	男	9	14:00:00					5
375	2019-01-21	1	男	48	11:10:00					2
376	2019-01-21	1	男		09:25:00					3
377	2019-01-21	1	男	40	11:30:00					6
378	2019-01-22	1	男	28	12:48:00					8
379	2019-01-22	1	女	27	12:00:00					2
380	2019-01-22	1	男	16	12:00:00					2
381	2019-01-22	1	男	64	15:20:00					1，8
382	2019-01-23	1	女	24	16:00:00					7
383	2019-01-23	1	女	21	10:50:00					6
384	2019-01-23	1	女	38	15:20:00					2
385	2019-01-23	1	男	30	09:40:00					2
386	2019-01-23	1	男	62	10:50:00					3
387	2019-01-23	1	女	26	15:30:00					8
388	2019-01-23	1	女	21	14:00:00					2
389	2019-01-24	1	男	27	10:08:00					2
390	2019-01-24	1	男	25	12:00:00					3
391	2019-01-24	1	男	34	14:40:00					8
392	2019-01-25	1	男	36	15:00:00					10
393	2019-01-25	1	男	20	14:42:00					1
394	2019-01-25	1	男	29						8
395	2019-01-25	1	男		13:28:00					3
396	2019-01-25	1	女	34	12:00:00					1
397	2019-01-25	1	女	23	12:00:00
61	2018-11-17	11	男	11	13:10:00					6
399	2019-01-25	1	女	27	15:45:00
400	2019-01-26	1	女	42	13:20:00					2
401	2019-01-26	1	男	24	12:00:00					3
402	2019-01-26	1	男	27	13:50:00					8
403	2019-01-26	1	男	20	13:30:00
404	2019-01-26	2	女	26	16:00:00					2
405	2019-01-26	1	女	35	14:00:00					2
348	2019-01-18	1	男	11	14:26:00					6
407	2019-01-26	1	男	48	12:00:00					6
408	2019-01-26	1	男	50	13:30:00					1，7
409	2019-01-27	1	男	41	11:00:00					8
410	2019-01-27	1	男	17	15:30:00					7
411	2019-01-27	1	女	28	14:30:00					4
412	2019-01-27	1	男	26	14:30:00					7
413	2019-01-27	1	男	40	14:00:00					8
414	2019-01-27	1	男	45	11:30:00					6
415	2019-01-27	1	女	28	10:30:00					5
416	2019-01-27	1	男	40	10:30:00
433	2019-01-30	1	男	10	15:48:00					6
418	2019-01-28	1	男	21	17:00:00					10
419	2019-01-28	1	男	30	10:30:00					9
420	2019-01-28	1	女	43	13:10:00					7
421	2019-01-28	1	男	66	15:00:00					1
422	2019-01-29	1	男	13	11:00:00					3
423	2019-01-29	1	男	26	15:50:00					7
424	2019-01-29	1	女	37	10:40:00					10
425	2019-01-29	1	女	16	09:45:00					8
426	2019-01-29	1	男	20	11:50:00					3
493	2019-02-11	2	男	12	16:30:00					6
76	2018-11-24	11	女	7	16:50:00					7
429	2019-01-29	1	女		14:00:00
430	2019-01-30	1	男	32	13:00:00					3
431	2019-01-30	1	女	28	13:50:00					7
432	2019-01-30	1	男	29	10:30:00					7
147	2018-12-08	12	男	10	14:30:00					7
360	2019-01-19	1	女	9	10:58:00					7
435	2019-01-31	1	女	35	14:40:00					7
436	2019-01-31	2	男	15	13:30:00					5
437	2019-01-31	1	女	26	16:00:00					6
438	2019-01-31	1	女		10:40:00					2
439	2019-02-01	2	女	30	11:00:00					5
374	2019-01-20	1	女	9	10:00:00					7
441	2019-02-01	2	女	25	14:00:00					2
406	2019-01-26	1	女	12	09:45:00					7
443	2019-02-01	2	男	46	16:20:00					5
444	2019-02-01		男	64	10:00:00					8
445	2019-02-01	2	男	27	11:10:00
446	2019-02-02	2	男	36	10:00:00					2
447	2019-02-02	2	男	23	14:40:00
448	2019-02-02	2	男	31	16:10:00
449	2019-02-02	2	男	19	13:30:00					3
450	2019-02-02	2	男	58	11:00:00					5
487	2019-02-10	2	男	10	14:40:00					7
452	2019-02-02	2	男	14	11:00:00					3，4
453	2019-02-02	2	男	15	14:40:00					9
454	2019-02-03	2	女	35	09:10:00					8
455	2019-02-03	2	男	55	10:30:00					6
456	2019-02-03	2	男	27	10:34:00					8
457	2019-02-05	2	男	30	14:40:00					8
458	2019-02-05	2	女		13:30:00					2
459	2019-02-06	2	男	52	14:50:00					5
460	2019-02-06	2	男	13	13:00:00					1，9
461	2019-02-06	2	女	42	16:20:00					6
462	2019-02-06	2	男	15	14:20:00					9
463	2019-02-06	2	男	29	14:30:00					8
464	2019-02-06	2	男	37	15:00:00					8
465	2019-02-06	2	男	34	12:10:00					8
466	2019-02-06	2	男	59	14:20:00					6
467	2019-02-06	2	女	14						1，6
468	2019-02-06	2	女	32	11:30:00					4
469	2019-02-07	2	男	27	10:00:00					3
504	2019-02-12	2	男	11	12:10:00					7
471	2019-02-07	2	男	30	12:00:00					1
472	2019-02-07	2	男	30	14:40:00					3
542	2019-02-19	2	男	12	15:30:00					7
474	2019-02-07	2	男	53	11:50:00					5
475	2019-02-07	2	男	16	13:30:00					10
476	2019-02-08	2	男	33	15:30:00					7
477	2019-02-08	2	男	34	14:40:00					8
478	2019-02-08	2	女	35	12:30:00					5
479	2019-02-08	2	男	47	15:20:00					8
480	2019-02-09	2	女	42						3
481	2019-02-09	2	女	37	15:00:00					4
482	2019-02-09	2	男	44						2
483	2019-02-09	2	女	32	09:50:00					8
484	2019-02-09	2	男	61	08:23:00					2
485	2019-02-09	2	男	40	10:10:00					2
486	2019-02-10	2	男	39	14:00:00					2
545	2019-02-20	2	男	11						7
488	2019-02-10	2	女	36	14:40:00
489	2019-02-11	2	男	33	15:40:00					7
490	2019-02-11	2	女	36	16:00:00					3，7
491	2019-02-11	2	男	39	12:00:00					10
492	2019-02-11	2	男	29	13:00:00					3
29	2018-11-10	11	女	3	11:30:00					8
494	2019-02-11	2	女	33	15:20:00					3
495	2019-02-11	2	男	20	16:20:00					9
496	2019-02-11	2	女	42	15:20:00					2
497	2019-02-11	2	男	28	12:00:00					6
498	2019-02-12	2	男	22	12:30:00					10
499	2019-02-12	2	女	45	13:30:00					2
500	2019-02-12	2	男	23	11:00:00					6
501	2019-02-12	2	女	43	14:00:00					2
502	2019-02-12	2	女	50	15:30:00					2
503	2019-02-12	2	男	21	16:20:00					10
186	2018-12-16	12	男	11	11:30:00					8
505	2019-02-12	2	男	56	11:00:00					8
506	2019-02-12	2	男		15:40:00					10
507	2019-02-13	2	男	37	12:00:00					3
508	2019-02-14	2	男	39	12:40:00					2
509	2019-02-14	2	男	43	12:00:00					6
510	2019-02-14	2	女	61	10:00:00					3
511	2019-02-14	2	男	52	12:40:00					3
512	2019-02-14	2	男	36	13:00:00					10
275	2019-01-01	1	男	7						8
514	2019-02-14	2	男	31	10:00:00					5
515	2019-02-14	2	男	16	10:10:00					3
516	2019-02-14	2	男	62	12:40:00					5
517	2019-02-15	2	男	31	16:30:00					6
518	2019-02-15	2	男	27	15:00:00
519	2019-02-15	2	男	35	16:30:00					2
520	2019-02-15	2	男	45	10:30:00					2
521	2019-02-15	2	女	62	13:30:00					5
522	2019-02-15	2	男	28	15:00:00					5
523	2019-02-16	2	女	29	16:30:00					7
524	2019-02-16	2	男	30	11:50:00					10
525	2019-02-16	2	男	27	12:30:00					2
526	2019-02-16	2	男	46	14:00:00					2
527	2019-02-16	2	男	35	16:20:00					4
528	2019-02-17	2	男	13	10:50:00					10
529	2019-02-17	2	女	26	16:40:00					10
530	2019-02-17	2	男	27	16:00:00					1
531	2019-02-17	2	女	37	10:30:00					2
532	2019-02-17	2	男	46	15:05:00					8
533	2019-02-18	2	女	37	16:00:00					3
534	2019-02-18	2	男	30	13:53:00					2
535	2019-02-18	2	男	16	09:50:00
536	2019-02-18	3	男	34	12:00:00					2
537	2019-02-18	2	女	22	12:00:00					10
538	2019-02-18	2	女	41	09:50:00					6
539	2019-02-18	2	男	51	09:30:00					7
540	2019-02-18	2	男	48	14:40:00					7
541	2019-02-18	2	女	35	16:00:00					5
349	2019-01-18	1	女	11	11:15:00					8
543	2019-02-19	2	女	13	09:42:00					6
544	2019-02-20	2	男	38	16:30:00					2
278	2019-01-01	1	男	7	10:30:00					9
546	2019-02-20	2	女	55	10:00:00					5
547	2019-02-20	2	男	35	16:00:00					6
548	2019-02-20	2	女	38	10:00:00					2
361	2019-01-19	1	男	6						9
513	2019-02-14	2	男	11	11:00:00					9
551	2019-02-21	2	男	63	11:30:00					2
552	2019-02-21	2	女	22	11:06:00					5
553	2019-02-21	2	女	6	10:30:00					9
554	2019-02-21	2	女	14	10:30:00
555	2019-02-21	2	男	50	12:30:00					1
556	2019-02-21	2	男	57	11:06:00
557	2019-02-21	2	女	55	11:40:00					1，6
558	2019-02-21	2	男	38	11:40:00
559	2019-02-21	2	男	31	11:35:00					3
560	2019-02-21	2	男	51	14:50:00					4，5
561	2019-02-21	3	男	25						2
562	2019-02-21	2	女	32	14:50:00					1
563	2019-02-21	2	男	13	16:15:00					1
564	2019-02-21	2	女	29	16:15:00					1，2
565	2019-02-22	2	男	41	12:00:00					2
566	2019-02-22	2	男	51	13:00:00					6
567	2019-02-23	2	女	25	14:30:00					8
568	2019-02-23	2	女	38	15:10:00					3
569	2019-02-23	2	女	27	14:00:00					7
570	2019-02-23	2	女	33	09:50:00					1
571	2019-02-23	2	男	25	16:40:00
572	2019-02-23	2	女	50	10:00:00					2
573	2019-02-23	2	男	24	10:00:00					2
574	2019-02-23	2	男	26	09:00:00					9
575	2019-02-23	2	男	32						8
576	2019-02-23	2	男	54	12:05:00					4
577	2019-02-23	2	男	39	16:20:00					4
578	2019-02-23	2	男		12:23:00					6
579	2019-02-23	3	男	31	11:00:00					7
580	2019-02-23	2	男	29	09:50:00
581	2019-02-23	2	男	28	16:40:00					9
582	2019-02-23	2	男	38	13:20:00					4，5
583	2019-02-23	2	男	30	16:20:00
584	2019-02-23	2	男	24	12:23:00
585	2019-02-23	2	男	55	13:40:00					1
586	2019-02-23	2	男	30	13:40:00					4
587	2019-02-23	2	男	36	16:00:00					5
588	2019-02-23	2	男	55	14:20:00					5
589	2019-02-23	2	女		15:00:00					1
590	2019-02-24	2	男	30	12:30:00					6
591	2019-02-24	2	女	37	15:00:00					2
592	2019-02-24	2	女	39	14:00:00					3
593	2019-02-24	2	男	30	11:00:00					8
594	2019-02-24	2	男	30	11:00:00					2
595	2019-02-24	2	男	38	13:00:00					10
629	2019-03-07	3	男	9	15:30:00					9
597	2019-02-25	3	男							6
598	2019-02-26	2	男	68	12:00:00					6
599	2019-02-28	2	男	23	11:00:00					2
600	2019-02-28	2	男		10:00:00					5
601	2019-03-01	3	女	14	10:00:00					5
602	2019-03-01	3	女	67						5，8
603	2019-03-01	3	男	54	15:52:00					6
604	2019-03-02	3	女	47	13:40:00					7
605	2019-03-02	3	女	25	14:30:00					2
606	2019-03-02	3	女	50	09:44:00					8
607	2019-03-02	3	男	29	15:00:00					2
608	2019-03-02	3	男	44	12:30:00					2
609	2019-03-02	3	男	42	16:00:00					4
610	2019-03-02	3	男	20	12:00:00					2
611	2019-03-02	3	男	37	13:45:00					7
612	2019-03-02	3	女	31	13:45:00
613	2019-03-02	3	男	15	10:50:00					5
614	2019-03-02	3	女	36	14:35:00					9
615	2019-03-02	3	男	37	14:35:00
616	2019-03-02	3	男	30	11:30:00					4
617	2019-03-02	3	男	30
618	2019-03-03	3	男	44	15:20:00					3
619	2019-03-03	3	男	30	13:00:00					8
620	2019-03-03	3	女	36	11:50:00					7
621	2019-03-03	3	男	38	13:13:00					4
622	2019-03-03	3	男	28	12:42:00					6
623	2019-03-03	3	女	21	10:40:00					4
624	2019-03-03	3	女	47	13:50:00					5
625	2019-03-04	3	男	29	14:25:00					6
626	2019-03-04	3	男	38	14:25:00
627	2019-03-06	3	男	20						5
628	2019-03-06	3	男	49	11:35:00					8
129	2018-12-02	12	男	10	09:00:00					10
630	2019-03-07	3	男	29	13:46:00					7
631	2019-03-07	3	男	38	15:30:00					6
632	2019-03-07	3	男	53	12:00:00					5
633	2019-03-07	3	男	42	10:30:00					7
634	2019-03-08	3	男	46	14:30:00					6
635	2019-03-09	3	男	40	11:30:00					2
636	2019-03-09	3	男	66	14:25:00					4
637	2019-03-09	3	女	37	16:50:00					1
638	2019-03-09	3	男	31	11:40:00					5
639	2019-03-09	3	女	32	10:00:00					8
640	2019-03-09	3	女	53	10:10:00					10
641	2019-03-09	3	男	31	13:25:00					3
642	2019-03-09	3	女	50	14:25:00
643	2019-03-10	3	男	36	12:00:00					4
644	2019-03-10	3	男	27	12:40:00					7
645	2019-03-10	3	女	27	11:19:00					4
646	2019-03-10	3	男	40	11:30:00
647	2019-03-10	3	女	34	09:30:00					5，7
648	2019-03-10	3	男	43	12:30:00					2
649	2019-03-10	3	男	64	08:28:00					5
650	2019-03-10	3	男	34	08:28:00					6
651	2019-03-10	3	女	49	12:30:00					10
652	2019-03-12	3	女	32	09:30:00					6
653	2019-03-12	3	女	33	14:30:00					4
654	2019-03-12	3	女	30	09:40:00					7
655	2019-03-12	3	女	36	14:30:00					8
656	2019-03-13	3	女	26	14:01:00					5
657	2019-03-13	3	男	33	14:01:00
658	2019-03-13	3	男	39	09:10:00					2
659	2019-03-13	3	男	57	11:00:00					2
660	2019-03-13	3	女		09:10:00					2
661	2019-03-14	3	女	33	11:28:00					5
662	2019-03-14	3	女	49	09:30:00					2
663	2019-03-15	3	女	28	15:30:00					10
664	2019-03-15	3	男	41	09:00:00					6
665	2019-03-16	3	男	45	09:35:00					8
666	2019-03-16	3	男	27	10:30:00					4
357	2019-01-19	1	女	10	15:00:00					10
668	2019-03-16	3	男	48						6
669	2019-03-16	3	男	50	11:00:00					3
670	2019-03-16	3	女	16	14:00:00					1
671	2019-03-16	3	男	38	15:45:00					1
672	2019-03-17	3	女	25	11:00:00					8
673	2019-03-17	3	女	25	13:24:00					7
674	2019-03-17	3	女	24	14:50:00					1
675	2019-03-17	3	女	26	13:00:00					1
676	2019-03-17	3	女	43	12:00:00					8
677	2019-03-17	3	男	27	11:00:00					10
678	2019-03-17	3	男	41	13:00:00
679	2019-03-17	3	男	14	11:00:00					2
680	2019-03-17	3	男	51	10:00:00					8
681	2019-03-17	3	男	42	10:00:00
682	2019-03-17	3	男	48	09:30:00
683	2019-03-17	3	女	43	10:00:00					2
684	2019-03-17	3	男	47	10:00:00
427	2019-01-29	1	男	10	11:34:00					10
686	2019-03-18	3	女	39	10:16:00					10
687	2019-03-18	3	男	41	14:15:00					6
688	2019-03-18	3	男	34	10:16:00					4，8
689	2019-03-18	3	男	32	11:06:00
690	2019-03-18	3	女	45	11:06:00					1
691	2019-03-19	3	男	24	11:20:00					4
692	2019-03-19	3	男	48	15:30:00					2
693	2019-03-19	3	男	22	11:20:00
694	2019-03-21	3	女	24	12:00:00					10
695	2019-03-22	3	女	21	16:00:00					10
696	2019-03-22	3	女	50	16:05:00					7
697	2019-03-22	3	女	25	09:30:00					5
698	2019-03-22	3	男	28	09:00:00					5
699	2019-03-23	3	女	27	09:52:00					2
700	2019-03-23	3	男	29	08:00:00					4
701	2019-03-23	3	男	48	13:30:00					7
702	2019-03-23	3	男	29	09:52:00					8
703	2019-03-23	3	男	42	10:30:00					7
704	2019-03-23	3	女	32	10:30:00					1，3
705	2019-03-24	3	女	27	14:30:00					3
706	2019-03-24	3	男	48	10:00:00					2
707	2019-03-24	3	女		11:00:00					7
708	2019-03-25	3	女	56	10:40:00					4
709	2019-03-25	3	女	28	15:10:00					7
710	2019-03-25	3	男	60	11:20:00					5
711	2019-03-28	3	女	40	13:20:00					5
712	2019-03-29	3	男	29	10:25:00					4
713	2019-03-29	3	男	20	14:30:00					8
714	2019-03-29	3	男	28	10:25:00
715	2019-03-30	3	女	22	09:30:00					8
716	2019-03-30	3	女	27	15:00:00					10
717	2019-03-31	3	男	29	09:00:00					8
718	2019-03-31	3	女	27	13:00:00					3
719	2019-03-31	3	男	23	12:00:00
720	2019-03-31	3	男	51	15:00:00					5
721	2019-03-31	3	男	46	10:30:00					10
722	2019-03-31	3	女	23	12:00:00					7
723	2019-03-31	3	女	33	11:00:00					5
724	2019-04-01	4	男	53	08:30:00					2
725	2019-04-02	4	女	32	15:50:00					6
726	2019-04-02	4	男	42	15:50:00					7
727	2019-04-02	4	男	38	13:00:00					4
728	2019-04-04	4	男	44	09:50:00					2
729	2019-04-05	4	女	40	12:00:00					7
730	2019-04-05	4	男	36	14:45:00					2
731	2019-04-05	4	男	25	11:00:00					3
732	2019-04-05	4	女	52	11:30:00					4
733	2019-04-05	4	女	44	10:09:00					6
734	2019-04-05	4	男	30	10:09:00
735	2019-04-06	4	男	29	16:15:00					6
736	2019-04-06	4	男	23	11:20:00					10
155	2018-12-09	12	男	11	12:00:00					2，8
738	2019-04-06	4	女	31	10:40:00					1，5
739	2019-04-06	4	男	29	11:00:00					6
740	2019-04-06	4	男	24	11:00:00					10
741	2019-04-06	4	男	26	11:40:00					2
742	2019-04-06	4	男	56	16:00:00					2
743	2019-04-06	4	男	57	08:46:00					4
434	2019-01-30	1	男	11	10:00:00					3，9
745	2019-04-06	4	女	56	08:46:00					1.1
746	2019-04-07	4	女	42	09:00:00					5
747	2019-04-08	4	男	25						6
748	2019-04-09	4	女	30	12:18:00					2
749	2019-04-09	4	女	26	09:40:00					6
750	2019-04-09	4	女	36	09:40:00					10
751	2019-04-09	4	男	47	11:20:00					5
752	2019-04-10	4	女	51	08:30:00					6
753	2019-04-10	4	男	41	08:30:00
754	2019-04-11	4	男	48						8
755	2019-04-12	4	女	63	12:00:00					5
